# Supplementary material for: Next Generation DNA-Seq and Differential RNA-Seq Allow Re-annotation of the Pyrococcus furiosus DSM 3638 Genome and Provide Insights Into Archaeal Antisense Transcription
Source: Front Microbiol. 2019 Jul 12;10:1603. doi: 10.3389/fmicb.2019.01603 (PMC6640164; doi:10.3389/fmicb.2019.01603)
Supplement: Supplementary file 2 [file Table_2.XLSX]

## Sheet: Tabelle1
Supplementary Table 2: List of locus tags including annotations for the the new P. furiosus genome assembly (CP023154) in comparison with the “new” and “old” locus tags of the 2002 reference assembly (NC_003413). Pseudogenes are highlighted in red. In addition, the positions of the inverted region and the deleted region are marked on the right.
Locus_tag (CP023154)	Genomic position (CP023154)		Locus_tag (NC_003413)	Genomic position (NC_003413)		Old locus_tag (NC_003413)	Gene (CP023154)	Annotation product (CP023154)
PFDSM3638_00005	1	1263	PF_RS00090	16236	17498	PF0017	PFDSM3638_00005	cell division control protein Cdc6
PFDSM3638_00010	1263	3104	PF_RS00095	17498	19339	PF0018	PFDSM3638_00010	DNA polymerase II
PFDSM3638_00015	3104	6895	PF_RS00100	19339	23130	PF0019	PFDSM3638_00015	DNA polymerase II large subunit
PFDSM3638_00020	6947	7579	PF_RS00105	23182	23814	PF0020	PFDSM3638_00020	hypothetical protein
PFDSM3638_00025	7590	8267	PF_RS00110	23795	24502	PF0021	PFDSM3638_00025	DNA repair and recombination protein RadB
PFDSM3638_00030	8264	9673	PF_RS00115	24499	25908	PF0022	PFDSM3638_00030	RNA-binding protein
PFDSM3638_00035	9627	10334	PF_RS00120	25862	26569	PF0023	PFDSM3638_00035	hypothetical protein
PFDSM3638_00040	14577	15917	PF_RS00125	30812	32152	PF0024	PFDSM3638_00040	glycerate kinase
PFDSM3638_00045	15972	16763	PF_RS00130	32207	32998	PF0025	PFDSM3638_00045	class II glutamine amidotransferase
PFDSM3638_00050	16744	18105	PF_RS00135	32979	34340	PF0026	PFDSM3638_00050	CCA tRNA nucleotidyltransferase
PFDSM3638_00055	18310	18864	PF_RS00140	34545	35099	PF0027	PFDSM3638_00055	RNA 2',3'-cyclic phosphodiesterase
PFDSM3638_00060	19151	19603	PF_RS00145	35386	35838	PF0028	PFDSM3638_00060	N-acetyltransferase
PFDSM3638_00065	19584	21017	PF_RS00150	35819	37252	PF0029	PFDSM3638_00065	hypothetical protein
PFDSM3638_00070	20998	22095	PF_RS00155	37233	38330	PF0030	PFDSM3638_00070	DUF1611 domain-containing protein
PFDSM3638_00075	22098	23000	PF_RS00160	38333	39235	PF0031	PFDSM3638_00075	PLP-dependent lyase/thiolase
PFDSM3638_00080	23319	23447	-	-	-	-	PFDSM3638_00080	peptidase
PFDSM3638_00085	23500	23784	PF_RS10510	39735	40019	PF0032	PFDSM3638_00085	permease
PFDSM3638_00090	23760	24035	PF_RS10470	39995	40270	-	PFDSM3638_00090	hypothetical protein
PFDSM3638_00095	24170	24748	PF_RS00170	40405	40983	PF0034	PFDSM3638_00095	hypothetical protein
PFDSM3638_00100	24874	25842	PF_RS00175	41109	42077	PF0035	PFDSM3638_00100	ABC transporter ATP-binding protein
PFDSM3638_00105	25829	26620	PF_RS00180	42064	42855	PF0036	PFDSM3638_00105	daunorubicin resistance protein
PFDSM3638_00110	26993	28687	PF_RS00185	43228	44922	PF0037	PFDSM3638_00110	hypothetical protein
PFDSM3638_00115	28684	29274	PF_RS00190	44919	45509	PF0038	PFDSM3638_00115	MBL fold metallo-hydrolase
PFDSM3638_00120	29317	29778	PF_RS00195	45552	46013	PF0039	PFDSM3638_00120	phosphoribosyltransferase
PFDSM3638_00125	29803	30378	PF_RS00200	46038	46613	PF0040	PFDSM3638_00125	phosphatase PAP2 family protein
PFDSM3638_00130	30401	32143	PF_RS00205	46636	48378	PF0041	PFDSM3638_00130	radical SAM protein
PFDSM3638_00135	32140	32883	PF_RS00210	48375	49118	PF0042	PFDSM3638_00135	metal-dependent hydrolase
PFDSM3638_00140	32948	35401	PF_RS00215	49183	51636	PF0043	PFDSM3638_00140	phosphoenolpyruvate synthase
PFDSM3638_00145	35525	36910	PF_RS00220	51760	53145	PF0044	PFDSM3638_00145	glycosyltransferase
PFDSM3638_00150	36900	37934	PF_RS00225	53135	54169	PF0045	PFDSM3638_00150	hypothetical protein
PFDSM3638_00155	37921	38889	PF_RS00230	54156	55124	PF0046	PFDSM3638_00155	hypothetical protein
PFDSM3638_00160	38889	39557	PF_RS00235	55124	55792	PF0047	PFDSM3638_00160	hypothetical protein
PFDSM3638_00165	39613	40335	PF_RS00240	55848	56570	PF0048	queC	7-cyano-7-deazaguanine synthase
PFDSM3638_00170	40319	41224	PF_RS00245	56554	57459	PF0049	PFDSM3638_00170	DNA cytosine methyltransferase
PFDSM3638_00175	41225	41512	PF_RS00250	57460	57747	PF0050	PFDSM3638_00175	DNA-directed RNA polymerase subunit L
PFDSM3638_00180	41472	42131	PF_RS00255	57707	58366	PF0051	PFDSM3638_00180	DUF2067 domain-containing protein
PFDSM3638_00185	42128	42721	PF_RS00260	58363	58956	PF0052	PFDSM3638_00185	RNA-binding protein
PFDSM3638_00190	42718	45228	PF_RS00265	58953	61463	PF0053	PFDSM3638_00190	RNA helicase
PFDSM3638_00195	45237	45704	PF_RS00270	61472	61939	PF0054	PFDSM3638_00195	transcriptional regulator
PFDSM3638_00200	45713	46048	PF_RS00275	61948	62283	PF0055	PFDSM3638_00200	transcriptional regulator
PFDSM3638_00205	46111	46479	PF_RS00280	62346	62714	PF0056	PFDSM3638_00205	cupin domain-containing protein
PFDSM3638_00210	46551	48203	PF_RS00285	62786	64441	PF0057	PFDSM3638_00210	DUF4910 domain-containing protein
PFDSM3638_00215	48196	49254	PF_RS00290	64434	65492	PF0058	PFDSM3638_00215	dolichol monophosphate mannose synthase
PFDSM3638_00220	49289	49972	PF_RS00295	65527	66210	PF0059	PFDSM3638_00220	fibrillin
PFDSM3638_00225	49978	51186	PF_RS00300	66216	67424	PF0060	PFDSM3638_00225	C/D box methylation guide ribonucleoprotein complex aNOP56 subunit
PFDSM3638_00230	51252	51803	PF_RS00305	67490	68041	PF0061	PFDSM3638_00230	riboflavin synthase
PFDSM3638_00235	51796	52860	PF_RS00310	68034	69098	PF0062	ribD	riboflavin biosynthesis protein RibD
PFDSM3638_00240	52850	53323	PF_RS00315	69088	69561	PF0063	PFDSM3638_00240	6,7-dimethyl-8-ribityllumazine synthase
PFDSM3638_00245	53320	54483	PF_RS00320	69558	70721	PF0064	PFDSM3638_00245	bifunctional 3,4-dihydroxy-2-butanone-4-phosphate synthase/GTP cyclohydrolase II
PFDSM3638_00250	54600	55232	PF_RS00325	70838	71470	PF0065	PFDSM3638_00250	hypothetical protein
PFDSM3638_00255	55186	55917	PF_RS00330	71424	72156	PF0067	PFDSM3638_00255	energy-coupling factor transporter transmembrane protein EcfT
PFDSM3638_00260	55914	56696	PF_RS00335	72153	72935	PF0068	PFDSM3638_00260	ABC transporter ATP-binding protein
PFDSM3638_00265	56754	57455	PF_RS00340	72993	73694	PF0069	PFDSM3638_00265	IS6 family transposase ISPfu2
PFDSM3638_00270	57633	58535	PF_RS00345	73872	74774	PF0070	PFDSM3638_00270	phosphoserine phosphatase
PFDSM3638_00275	58541	60253	PF_RS00350	74780	76492	PF0071	PFDSM3638_00275	RNA-binding protein
PFDSM3638_00280	60250	61392	PF_RS00355	76489	77631	PF0072	PFDSM3638_00280	hypothetical protein
PFDSM3638_00295	61780	63198	PF_RS00370	78019	79437	PF0073	PFDSM3638_00295	glycoside hydrolase family 1 protein
PFDSM3638_00300	63374	64078	PF_RS00375	79613	80317	PF0074	PFDSM3638_00300	NAD(P)-dependent oxidoreductase
PFDSM3638_00305	64089	65261	PF_RS00380	80328	81500	PF0075	PFDSM3638_00305	alcohol dehydrogenase
PFDSM3638_00310	65274	66167	PF_RS00385	81513	82406	PF0076	PFDSM3638_00310	hydrolase
PFDSM3638_00315	66209	66916	PF_RS00390	82448	83155	PF0077	PFDSM3638_00315	biotin--[acetyl-CoA-carboxylase] ligase
PFDSM3638_00320	66899	67807	PF_RS00395	83138	84046	PF0078	PFDSM3638_00320	2-phosphoglycerate kinase
PFDSM3638_00325	67791	69083	PF_RS00400	84030	85325	PF0079	PFDSM3638_00325	2,3-diphosphoglycerate synthetase
PFDSM3638_00330	69225	70244	PF_RS00405	85467	86486	PF0080	PFDSM3638_00330	tungstate ABC transporter substrate-binding protein WtpA
PFDSM3638_00335	70317	71066	PF_RS00410	86559	87308	PF0081	PFDSM3638_00335	molybdenum ABC transporter permease
PFDSM3638_00340	71059	72093	PF_RS00415	87301	88335	PF0082	PFDSM3638_00340	molybdenum ABC transporter ATP-binding protein
PFDSM3638_00345	72090	72641	PF_RS00420	88332	88883	PF0083	PFDSM3638_00345	RNA 2'-phosphotransferase
PFDSM3638_00350	72625	76683	PF_RS00425	88867	92926	PF0085	PFDSM3638_00350	DNA helicase
PFDSM3638_00355	76697	77341	PF_RS00430	92940	93584	PF0086	PFDSM3638_00355	alanyl-tRNA editing protein AlaX
PFDSM3638_00360	77397	77807	PF_RS00435	93640	94050	PF0087	PFDSM3638_00360	inosine-5-monophosphate dehydrogenase
PFDSM3638_00365	77814	79319	PF_RS00440	94057	95562	PF0088	PFDSM3638_00365	phosphohydrolase
PFDSM3638_00370	79324	80325	PF_RS00445	95567	96568	PF0089	PFDSM3638_00370	class I SAM-dependent methyltransferase family protein
PFDSM3638_00375	80384	81307	PF_RS00450	96627	97550	PF0090	PFDSM3638_00375	GTP 3',8-cyclase MoaA
PFDSM3638_00380	81355	82176	PF_RS00455	97598	98419	PF0091	PFDSM3638_00380	DUF835 domain-containing protein
PFDSM3638_00385	82177	83616	PF_RS00460	98420	99859	PF0092	PFDSM3638_00385	replication protein C
PFDSM3638_00390	83623	86181	PF_RS00465	99866	102424	PF0093	PFDSM3638_00390	replication factor C small subunit
PFDSM3638_00395	86276	86956	PF_RS00470	102519	103199	PF0094	PFDSM3638_00395	glutaredoxin
PFDSM3638_00400	87089	87787	PF_RS00475	103332	104030	PF0095	PFDSM3638_00400	transcriptional regulator
PFDSM3638_00405	87774	87965	PF_RS00480	104017	104208	PF0096	PFDSM3638_00405	ferredoxin
PFDSM3638_00410	87962	89143	PF_RS00485	104205	105386	PF0097	PFDSM3638_00410	digeranylgeranylglycerophospholipid reductase
PFDSM3638_00415	89127	89900	PF_RS00490	105370	106143	PF0098	PFDSM3638_00415	NAD(+) synthetase
PFDSM3638_00420	89897	90847	PF_RS00495	106140	107090	PF0099	PFDSM3638_00420	hypothetical protein
PFDSM3638_00425	90902	91339	PF_RS00500	107145	107582	PF0100	PFDSM3638_00425	molybdenum cofactor biosynthesis protein MoaE
PFDSM3638_00430	91433	92347	PF_RS00505	107676	108590	PF0101	PFDSM3638_00430	SPASM domain-containing protein
PFDSM3638_00435	92479	93225	PF_RS00510	108722	109468	PF0102	PFDSM3638_00435	ATPase
PFDSM3638_00440	93235	94000	PF_RS00515	109478	110243	-	PFDSM3638_00440	recombinase RecA
PFDSM3638_00445	94040	95194	PF_RS00520	110283	111437	PF0105	PFDSM3638_00445	DNA-binding protein
PFDSM3638_00450	95173	96294	PF_RS00525	111416	112537	PF0106	PFDSM3638_00450	hypothetical protein
PFDSM3638_00455	96327	96914	PF_RS00530	112570	113157	PF0107	PFDSM3638_00455	hypothetical protein
PFDSM3638_00460	96901	97470	PF_RS00535	113144	113713	PF0108	PFDSM3638_00460	fuculose phosphate aldolase
PFDSM3638_00470	97800	98645	PF_RS00540	114043	114888	PF0109	PFDSM3638_00470	EamA family transporter
PFDSM3638_00475	98638	99681	PF_RS00545	114881	115924	PF0110	PFDSM3638_00475	DNA primase catalytic subunit PriS
PFDSM3638_00480	99632	100822	PF_RS00550	115875	117065	PF0111	PFDSM3638_00480	DNA primase
PFDSM3638_00485	100872	101936	PF_RS00555	117115	118179	PF0112	PFDSM3638_00485	polyhydroxyalkanoate depolymerase
PFDSM3638_00490	101999	102466	PF_RS00560	118242	118709	PF0113	PFDSM3638_00490	Lrp/AsnC family transcriptional regulator
PFDSM3638_00495	102438	103010	PF_RS00565	118681	119253	PF0114	PFDSM3638_00495	GTP-binding protein
PFDSM3638_00500	103073	104263	PF_RS00570	119316	120506	PF0115	PFDSM3638_00500	proteasome-activating nucleotidase
PFDSM3638_00505	104347	105441	PF_RS00575	120590	121684	PF0116	PFDSM3638_00505	ABC transporter ATP-binding protein
PFDSM3638_00510	105453	106322	PF_RS00580	121696	122565	PF0117	PFDSM3638_00510	carbohydrate ABC transporter permease
PFDSM3638_00515	106319	107266	PF_RS00585	122562	123509	PF0118	PFDSM3638_00515	sugar ABC transporter permease
PFDSM3638_00520	107267	108892	PF_RS00590	123510	125135	PF0119	PFDSM3638_00520	ABC transporter substrate-binding protein
PFDSM3638_00525	109388	110422	PF_RS00595	125631	126665	PF0120	PFDSM3638_00525	transposase
PFDSM3638_00530	110433	111674	PF_RS00600	126676	127917	PF0121	PFDSM3638_00530	PLP-dependent aminotransferase family protein
PFDSM3638_00535	111985	112950	PF_RS00605	128228	129193	PF0122	PFDSM3638_00535	ribose 1,5-bisphosphate isomerase
PFDSM3638_00540	112947	113345	PF_RS00610	129190	129588	PF0123	PFDSM3638_00540	hypothetical protein
PFDSM3638_00545	113463	114488	PF_RS00615	129706	130731	PF0124	PFDSM3638_00545	transcriptional regulator
PFDSM3638_00550	114472	114705	PF_RS00620	130715	130948	PF0125	PFDSM3638_00550	hypothetical protein
PFDSM3638_00555	114817	116151	PF_RS00625	131060	132394	PF0126	PFDSM3638_00555	ATP-dependent helicase
PFDSM3638_00560	116139	116984	PF_RS00630	132382	133227	PF0127	PFDSM3638_00560	spermidine synthase
PFDSM3638_00565	117071	118270	PF_RS00635	133314	134513	PF0128	PFDSM3638_00565	ATPase
PFDSM3638_00570	118267	118779	PF_RS00640	134510	135022	PF0129	PFDSM3638_00570	metal-dependent hydrolase
PFDSM3638_00575	118766	119374	PF_RS00645	135009	135617	PF0130	PFDSM3638_00575	MarC family protein
PFDSM3638_00580	119394	120338	PF_RS00650	135637	136581	PF0131	PFDSM3638_00580	hypothetical protein
PFDSM3638_00600	125606	127072	PF_RS00675	141849	143318	PF0132	PFDSM3638_00600	DUF2139 domain-containing protein
PFDSM3638_00605	127078	127644	PF_RS00680	143324	143890	PF0133	PFDSM3638_00605	DUF366 domain-containing protein
PFDSM3638_00610	127638	128246	PF_RS00685	143884	144492	PF0134	PFDSM3638_00610	hypothetical protein
PFDSM3638_00615	128361	129932	PF_RS00690	144607	146178	PF0135	PFDSM3638_00615	lysine--tRNA ligase
PFDSM3638_00620	129938	130840	PF_RS00695	146184	147086	PF0136	PFDSM3638_00620	hypothetical protein
PFDSM3638_00625	130811	131497	PF_RS00700	147057	147743	PF0137	PFDSM3638_00625	class I SAM-dependent methyltransferase
PFDSM3638_00630	131564	132535	PF_RS00705	147810	148781	PF0138	PFDSM3638_00630	rubrerythrin
PFDSM3638_00635	132606	133205	PF_RS00710	148852	149451	PF0139	PFDSM3638_00635	indolepyruvate oxidoreductase subunit B
PFDSM3638_00640	133180	134343	PF_RS00715	149426	150589	PF0140	PFDSM3638_00640	MFS transporter
PFDSM3638_00645	134432	135349	PF_RS00720	150678	151595	PF0141	PFDSM3638_00645	transcriptional regulator
PFDSM3638_00650	135402	136322	PF_RS00725	151648	152568	PF0142	PFDSM3638_00650	asparaginase
PFDSM3638_00655	136322	137485	PF_RS00730	152568	153731	PF0143	PFDSM3638_00655	MFS transporter
PFDSM3638_00660	137475	138404	PF_RS00735	153721	154650	PF0144	PFDSM3638_00660	radical SAM protein
PFDSM3638_00665	138406	139020	PF_RS00740	154652	155266	PF0145	tsaA	tRNA (N6-threonylcarbamoyladenosine(37)-N6)-methyltransferase TrmO
PFDSM3638_00670	139017	139607	PF_RS00745	155263	155853	PF0146	PFDSM3638_00670	potassium channel protein
PFDSM3638_00675	139594	140211	PF_RS00750	155840	156457	PF0147	PFDSM3638_00675	potassium channel protein
PFDSM3638_00680	140403	140975	PF_RS00755	156649	157221	PF0148	PFDSM3638_00680	DUF998 domain-containing protein
PFDSM3638_00685	140990	141781	PF_RS00760	157236	158027	PF0149	PFDSM3638_00685	short-chain dehydrogenase
PFDSM3638_00690	141846	142460	PF_RS00765	158092	158706	PF0150	PFDSM3638_00690	hypothetical protein
PFDSM3638_00695	142457	143248	PF_RS00770	158703	159494	PF0151	PFDSM3638_00695	hypothetical protein
PFDSM3638_00700	143245	143904	PF_RS00775	159491	160150	PF0152	PFDSM3638_00700	TIGR00266 family protein
PFDSM3638_00705	143940	144644	PF_RS00780	160186	160890	PF0153	PFDSM3638_00705	phosphoribosylaminoimidazolesuccinocarboxamide synthase
PFDSM3638_00710	144736	146064	PF_RS00785	160982	162310	PF0154	PFDSM3638_00710	amidophosphoribosyltransferase
PFDSM3638_00715	146234	147538	PF_RS00790	162480	163784	PF0155	PFDSM3638_00715	asparagine--tRNA ligase
PFDSM3638_00725	147872	150748	PF_RS00795	164118	166994	PF0156	PFDSM3638_00725	peptide transporter
PFDSM3638_00730	150764	152560	PF_RS00800	167010	168806	PF0157	glmS	glutamine--fructose-6-phosphate aminotransferase
PFDSM3638_00735	152638	153687	PF_RS00805	168884	169933	PF0158	PFDSM3638_00735	hypothetical protein
PFDSM3638_00740	153684	154274	PF_RS00810	169930	170520	PF0159	psmB	proteasome endopeptidase complex, archaeal, beta subunit
PFDSM3638_00745	154349	155722	PF_RS00815	170595	171968	PF0160	PFDSM3638_00745	TLDD - like protein
PFDSM3638_00750	155719	156981	PF_RS00820	171965	173227	PF0161	PFDSM3638_00750	pmba protein (tlde protein)
PFDSM3638_00755	157032	157598	PF_RS00825	173278	173844	PF0162	PFDSM3638_00755	hypothetical protein
PFDSM3638_00760	157601	158311	PF_RS00830	173847	174557	PF0163	PFDSM3638_00760	ECF transporter S component
PFDSM3638_00765	158310	159515	PF_RS00835	174556	175761	PF0164	PFDSM3638_00765	cysteine desulfurase
PFDSM3638_00770	159499	160191	PF_RS00840	175745	176437	PF0165	PFDSM3638_00770	HAD family hydrolase
PFDSM3638_00775	160188	160703	PF_RS00845	176434	176949	PF0166	PFDSM3638_00775	TIGR00725 family protein
PFDSM3638_00780	160703	161812	PF_RS00850	176949	178058	PF0167	PFDSM3638_00780	metalloprotease
PFDSM3638_00785	161904	162407	PF_RS00855	178150	178653	PF0168	PFDSM3638_00785	DUF3201 domain-containing protein
PFDSM3638_00790	162404	163564	PF_RS00860	178650	179810	PF0169	PFDSM3638_00790	Sun/NOL1/NOP nucleolar protein
PFDSM3638_00795	163561	164559	PF_RS00865	179807	180805	PF0170	PFDSM3638_00795	lysylphosphatidylglycerol synthetase family protein
PFDSM3638_00800	164556	165071	PF_RS00870	180802	181317	PF0171	PFDSM3638_00800	DUF835 domain-containing protein
PFDSM3638_00805	165279	166253	PF_RS00875	181525	182499	PF0172	PFDSM3638_00805	UGMP family protein
PFDSM3638_00810	166353	167243	PF_RS00880	182599	183489	PF0173	PFDSM3638_00810	preprotein translocase subunit SecF
PFDSM3638_00815	167240	168757	PF_RS00885	183486	185003	PF0174	PFDSM3638_00815	preprotein translocase subunit SecD
PFDSM3638_00820	168763	169455	PF_RS00890	185009	185701	PF0175	PFDSM3638_00820	TrkA family potassium uptake protein
PFDSM3638_00825	169548	169859	PF_RS00895	185794	186105	PF0176	ahaH	ATP synthase archaeal subunit H
PFDSM3638_00830	169861	171852	PF_RS00900	186107	188098	PF0177	PFDSM3638_00830	V-type ATP synthase subunit I
PFDSM3638_00835	171854	172333	PF_RS00905	188100	188579	PF0178	PFDSM3638_00835	V-type ATP synthase subunit K
PFDSM3638_00840	172368	172964	PF_RS00910	188614	189210	PF0179	PFDSM3638_00840	V-type ATP synthase subunit E
PFDSM3638_00845	172971	174083	PF_RS00915	189217	190329	PF0180	PFDSM3638_00845	V-type ATP synthase subunit C
PFDSM3638_00850	174080	174391	PF_RS00920	190326	190637	PF0181	PFDSM3638_00850	V-type ATP synthase subunit F
PFDSM3638_00855	174398	177439	PF_RS00925	190644	193685	PF0182	PFDSM3638_00855	V-type ATP synthase subunit A
PFDSM3638_00860	177445	178833	PF_RS00930	193691	195079	PF0183	PFDSM3638_00860	ATP synthase subunit B
PFDSM3638_00865	178864	179508	PF_RS00935	195110	195754	PF0184	PFDSM3638_00865	V-type ATP synthase subunit D
PFDSM3638_00870	179540	180754	PF_RS00940	195786	197000	PF0185	PFDSM3638_00870	alanyl-tRNA editing protein AlaX
PFDSM3638_00875	180729	181556	PF_RS00945	196975	197802	PF0186	PFDSM3638_00875	hypothetical protein
PFDSM3638_00880	181622	182530	PF_RS00950	197868	198776	PF0187	PFDSM3638_00880	radical SAM protein
PFDSM3638_00885	182541	183284	PF_RS00955	198787	199530	PF0188	PFDSM3638_00885	dihydroorotate dehydrogenase electron transfer subunit
PFDSM3638_00890	183232	184476	PF_RS00960	199478	200722	PF0189	PFDSM3638_00890	dihydroorotase
PFDSM3638_00895	184789	187278	PF_RS00965	201035	203524	PF0190	PFDSM3638_00895	peptide ABC transporter substrate-binding protein
PFDSM3638_00900	187466	188515	PF_RS00970	203712	204761	PF0191	PFDSM3638_00900	ABC transporter permease
PFDSM3638_00905	188526	189950	PF_RS00975	204772	206196	PF0192	PFDSM3638_00905	ABC transporter permease
PFDSM3638_00910	189961	190920	PF_RS00980	206207	207166	PF0193	PFDSM3638_00910	ABC transporter ATP-binding protein
PFDSM3638_00915	190931	191938	PF_RS00985	207177	208184	PF0194	PFDSM3638_00915	ABC transporter ATP-binding protein
PFDSM3638_00920	191950	192456	PF_RS00990	208196	208702	PF0195	PFDSM3638_00920	hypothetical protein
PFDSM3638_00925	192449	193018	PF_RS00995	208695	209264	PF0196	PFDSM3638_00925	glucose-6-phosphate isomerase
PFDSM3638_00930	193086	193325	PF_RS01000	209332	209571	PF0197	PFDSM3638_00930	phosphoribosylformylglycinamidine synthase subunit PurS
PFDSM3638_00935	193331	194002	PF_RS01005	209577	210248	PF0198	purQ	phosphoribosylformylglycinamidine synthase I
PFDSM3638_00940	194111	196225	PF_RS01010	210357	212471	PF0199	PFDSM3638_00940	phosphoribosylformylglycinamidine synthase
PFDSM3638_00945	196389	197831	PF_RS01020	212635	214077	PF0200	PFDSM3638_00945	bifunctional ADP-dependent NAD(P)H-hydrate dehydratase/NAD(P)H-hydrate epimerase
PFDSM3638_00950	197874	200369	PF_RS01025	214120	216615	PF0201	acnA	aconitate hydratase AcnA
PFDSM3638_00955	200374	201576	PF_RS01030	216620	217822	PF0202	PFDSM3638_00955	isocitrate dehydrogenase (NADP(+))
PFDSM3638_00960	201582	202715	PF_RS01035	217828	218961	PF0203	PFDSM3638_00960	citrate synthase
PFDSM3638_00965	203072	204181	PF_RS01040	219318	220427	PF0204	PFDSM3638_00965	hypothetical protein
PFDSM3638_00970	204178	205686	PF_RS01045	220424	221932	PF0205	PFDSM3638_00970	FMN-binding glutamate synthase family protein
PFDSM3638_00975	205683	206510	PF_RS01050	221929	222756	PF0206	PFDSM3638_00975	hypothetical protein
PFDSM3638_00980	206599	207831	PF_RS01055	222845	224077	PF0207	PFDSM3638_00980	argininosuccinate synthase
PFDSM3638_00985	207845	209224	PF_RS01060	224091	225470	PF0208	argH	argininosuccinate lyase
PFDSM3638_00990	209193	210014	PF_RS01065	225439	226260	PF0209	lysX	lysine biosynthesis protein LysX
PFDSM3638_00995	210011	211615	PF_RS01070	226257	227861	PF0210	PFDSM3638_00995	radical SAM protein
PFDSM3638_01000	211759	212373	PF_RS01075	228005	228619	PF0211	PFDSM3638_01000	DNA methylase
PFDSM3638_01005	212360	214687	PF_RS01080	228606	230933	PF0212	PFDSM3638_01005	DNA polymerase
PFDSM3638_01010	214788	215600	PF_RS01085	231034	231846	PF0213	PFDSM3638_01010	MBL fold metallo-hydrolase
PFDSM3638_01015	215597	216337	PF_RS01090	231843	232583	PF0214	PFDSM3638_01015	ATPase
PFDSM3638_01020	216375	217667	PF_RS01095	232621	233913	PF0215	eno	enolase
PFDSM3638_01025	217702	218274	PF_RS01100	233948	234520	PF0216	maf	septum formation protein Maf
PFDSM3638_01030	218400	218684	PF_RS01105	234645	234929	PF0217	PFDSM3638_01030	50S ribosomal protein L44e
PFDSM3638_01035	218689	218880	PF_RS01110	234934	235125	PF0218	PFDSM3638_01035	30S ribosomal protein S27e
PFDSM3638_01040	218855	219310	PF_RS01115	235100	235555	PF0219	PFDSM3638_01040	6-carboxytetrahydropterin synthase
PFDSM3638_01045	219388	220608	PF_RS01120	235633	236852	PF0220	PFDSM3638_01045	Fe-S cluster assembly protein HesB
PFDSM3638_01050	220699	221388	PF_RS01125	236943	237632	PF0221	PFDSM3638_01050	hypothetical protein
PFDSM3638_01055	221382	222041	PF_RS01130	237626	238285	PF0222	PFDSM3638_01055	TIGR02253 family HAD-type hydrolase
PFDSM3638_01060	222025	222207	PF_RS01135	238269	238451	PF0222.1n	PFDSM3638_01060	hypothetical protein
PFDSM3638_01065	222204	222992	PF_RS01140	238448	239236	PF0223	PFDSM3638_01065	DUF4392 domain-containing protein
PFDSM3638_01070	222985	223599	PF_RS01145	239229	239843	PF0224	PFDSM3638_01070	HD domain-containing protein
PFDSM3638_01075	223649	224131	PF_RS01150	239893	240377	-	PFDSM3638_01075	GNAT family N-acetyltransferase
PFDSM3638_01085	224691	226310	PF_RS01160	240936	242555	PF0229	PFDSM3638_01085	transporter
PFDSM3638_01090	226401	226979	PF_RS01165	242646	243224	PF0230	PFDSM3638_01090	transcriptional regulator
PFDSM3638_01095	226988	227293	PF_RS01170	243233	243538	PF0231	PFDSM3638_01095	hypothetical protein
PFDSM3638_01100	227293	227856	PF_RS01175	243538	244101	PF0232	PFDSM3638_01100	transcriptional regulator
PFDSM3638_01105	227916	229313	PF_RS01180	244161	245558	PF0233	PFDSM3638_01105	CoA-binding protein
PFDSM3638_01110	229299	230372	PF_RS01185	245544	246617	PF0234	PFDSM3638_01110	DUF835 domain-containing protein
PFDSM3638_01115	230369	231631	PF_RS01190	246614	247876	PF0235	PFDSM3638_01115	glucose-1-phosphate thymidylyltransferase
PFDSM3638_01120	231684	232523	PF_RS01195	247929	248768	PF0236	PFDSM3638_01120	ribose-phosphate diphosphokinase
PFDSM3638_01125	232536	233231	PF_RS01200	248781	249476	PF0237	PFDSM3638_01125	DUF1614 domain-containing protein
PFDSM3638_01130	233228	233581	PF_RS01205	249473	249826	PF0238	PFDSM3638_01130	ASCH domain-containing protein
PFDSM3638_01135	233633	233893	PF_RS01210	249878	250138	PF0239	PFDSM3638_01135	hypothetical protein
PFDSM3638_01140	234632	235474	PF_RS01215	250877	251719	PF0240	PFDSM3638_01140	hypothetical protein
PFDSM3638_01145	235543	236700	PF_RS01220	251788	252945	PF0241	PFDSM3638_01145	tryptophan--tRNA ligase
PFDSM3638_01150	236831	237410	PF_RS10520	253076	253655	-	PFDSM3638_01150	IS6 family transposase
PFDSM3638_01155	237474	238667	PF_RS01230	253719	254912	PF0243	PFDSM3638_01155	AAA family ATPase
PFDSM3638_01160	238901	239107	PF_RS01235	254985	255350	-	PFDSM3638_01160	hypothetical protein
PFDSM3638_01165	239516	239827	PF_RS01240	255759	256070	PF0246	PFDSM3638_01165	hypothetical protein
PFDSM3638_01170	239820	240749	PF_RS01245	256063	256992	PF0247	PFDSM3638_01170	Lrp/AsnC family transcriptional regulator
PFDSM3638_01175	240903	241391	PF_RS01250	257146	257634	PF0248	PFDSM3638_01175	adenosine monophosphate-protein transferase
PFDSM3638_01180	241403	241960	PF_RS01255	257646	258203	PF0249	rdgB	non-canonical purine NTP pyrophosphatase
PFDSM3638_01185	241992	242444	PF_RS01260	258235	258687	PF0250	PFDSM3638_01185	transcriptional regulator
PFDSM3638_01190	242800	243996	PF_RS01265	259043	260239	PF0251	PFDSM3638_01190	class I SAM-dependent rRNA methyltransferase
PFDSM3638_01195	246153	246305	PF_RS01275	262329	262481	PF0252	PFDSM3638_01195	30S ribosomal protein S27ae
PFDSM3638_01200	246308	246607	PF_RS01280	262484	262783	PF0253	PFDSM3638_01200	30S ribosomal protein S24e
PFDSM3638_01205	246597	247130	PF_RS01285	262773	263306	PF0254	PFDSM3638_01205	hypothetical protein
PFDSM3638_01210	247130	247315	PF_RS01290	263306	263491	PF0255	PFDSM3638_01210	transcription elongation factor Spt4
PFDSM3638_01215	247312	247881	PF_RS01295	263488	264057	PF0256	PFDSM3638_01215	DNA-directed RNA polymerase
PFDSM3638_01220	247920	248456	PF_RS01300	264096	264632	PF0257	PFDSM3638_01220	inorganic pyrophosphatase
PFDSM3638_01225	248526	249371	PF_RS01305	264702	265547	PF0258	PFDSM3638_01225	hypothetical protein
PFDSM3638_01230	249443	249745	PF_RS01310	265619	265921	PF0259	PFDSM3638_01230	thiamine-binding protein
PFDSM3638_01235	249742	250872	PF_RS01315	265918	267048	PF0260	PFDSM3638_01235	DUF373 domain-containing protein
PFDSM3638_01240	250864	253635	PF_RS01320	267040	269811	PF0261	PFDSM3638_01240	hypothetical protein
PFDSM3638_01245	253622	255868	PF_RS01325	269798	272044	PF0262	PFDSM3638_01245	MFS transporter
PFDSM3638_01250	255942	256460	PF_RS01330	272118	272636	PF0263	PFDSM3638_01250	MarR family transcriptional regulator
PFDSM3638_01255	256530	257828	PF_RS01335	272706	274004	PF0264	PFDSM3638_01255	histidine--tRNA ligase
PFDSM3638_01260	257932	259119	PF_RS01340	274108	275295	PF0265	PFDSM3638_01260	8-amino-7-oxononanoate synthase
PFDSM3638_01265	259834	260346	PF_RS01345	276009	276521	PF0266	endA	tRNA-intron lyase
PFDSM3638_01270	260343	260855	PF_RS01350	276518	277030	PF0267	rimI	ribosomal-protein-alanine N-acetyltransferase
PFDSM3638_01275	260948	262075	PF_RS01355	277123	278250	PF0268	PFDSM3638_01275	cation:proton antiporter
PFDSM3638_01280	262169	262435	PF_RS01360	278344	278610	PF0269	PFDSM3638_01280	hypothetical protein
PFDSM3638_01285	262481	265225	PF_RS01365	278656	281400	PF0270	alaS	alanine--tRNA ligase
PFDSM3638_01290	265230	265691	PF_RS01370	281405	281866	PF0271	PFDSM3638_01290	hypothetical protein
PFDSM3638_01295	265804	267753	PF_RS01375	281979	283928	PF0272	PFDSM3638_01295	4-alpha-glucanotransferase
PFDSM3638_01300	267804	268655	PF_RS01380	283979	284830	PF0273	PFDSM3638_01300	alpha hydrolase
PFDSM3638_01305	268818	269957	PF_RS01390	285783	286922	PF0275	PFDSM3638_01305	cation:proton antiporter
PFDSM3638_01310	269958	271409	PF_RS01395	286923	288374	PF0276	PFDSM3638_01310	FAD-dependent oxidoreductase
PFDSM3638_01315	271455	273611	PF_RS01400	288420	290576	PF0277	PFDSM3638_01315	hypothetical protein
PFDSM3638_01320	273615	274403	PF_RS01405	290580	291368	PF0278	PFDSM3638_01320	ABC transporter permease
PFDSM3638_01325	274396	275334	PF_RS01410	291361	292299	PF0279	PFDSM3638_01325	ABC transporter ATP-binding protein
PFDSM3638_01330	275372	275686	PF_RS01415	292337	292651	PF0280	PFDSM3638_01330	hypothetical protein
PFDSM3638_01335	275728	276114	PF_RS01420	292693	293079	PF0281	PFDSM3638_01335	hypothetical protein
PFDSM3638_01340	276209	276850	PF_RS01425	293174	293815	PF0282	PFDSM3638_01340	YfcE family phosphodiesterase
PFDSM3638_01345	276885	277160	PF_RS01430	293850	294125	PF0283	PFDSM3638_01345	acylphosphatase
PFDSM3638_01350	277150	277731	PF_RS01435	294115	294696	PF0284	PFDSM3638_01350	regulator of amino acid metabolism, contains ACT domain protein
PFDSM3638_01355	277841	279298	PF_RS01440	294806	296263	PF0285	PFDSM3638_01355	IMP dehydrogenase
PFDSM3638_01360	279451	280269	PF_RS01445	296416	297234	PF0286	PFDSM3638_01360	DNA endonuclease
PFDSM3638_01370	280593	284789	PF_RS01455	297558	301754	PF0287	PFDSM3638_01370	pyrolysin
PFDSM3638_01375	284815	285336	PF_RS01460	301780	302301	PF0288	PFDSM3638_01375	DUF59 domain-containing protein
PFDSM3638_01380	285471	287345	PF_RS01465	302436	304310	PF0289	PFDSM3638_01380	phosphoenolpyruvate carboxykinase
PFDSM3638_01385	287350	290025	PF_RS01470	304315	306990	PF0290	PFDSM3638_01385	valine--tRNA ligase
PFDSM3638_01390	290184	290984	PF_RS01475	307149	307949	PF0291	PFDSM3638_01390	prephenate dehydratase
PFDSM3638_01395	291024	292034	PF_RS01480	307989	308999	PF0292	PFDSM3638_01395	deoxyhypusine synthase
PFDSM3638_01400	292050	293006	PF_RS01485	309015	309971	PF0293	PFDSM3638_01400	aminotransferase
PFDSM3638_01405	293003	293428	PF_RS01490	309968	310393	PF0294	cobZ	alpha-ribazole phosphatase CobZ
PFDSM3638_01410	293376	294071	PF_RS01495	310341	311036	PF0295	PFDSM3638_01410	ATP pyrophosphatase
PFDSM3638_01415	294075	294932	PF_RS01500	311040	311897	PF0296	PFDSM3638_01415	cobalamin biosynthesis protein
PFDSM3638_01420	297297	297719	PF_RS01505	314195	314617	PF0297	PFDSM3638_01420	ArsR family transcriptional regulator
PFDSM3638_01425	297776	298246	PF_RS01510	314674	315144	PF0298	PFDSM3638_01425	hypothetical protein
PFDSM3638_01430	298243	298503	PF_RS01515	315141	315401	PF0298.1n	PFDSM3638_01430	hypothetical protein
PFDSM3638_01435	298463	299149	PF_RS01520	315361	316047	PF0299	PFDSM3638_01435	adenosylcobinamide-GDP ribazoletransferase
PFDSM3638_01440	299146	299697	PF_RS01525	316044	316595	PF0300	PFDSM3638_01440	GTP--adenosylcobinamide-phosphate guanylyltransferase
PFDSM3638_01445	299675	301126	PF_RS01530	316573	318024	PF0301	PFDSM3638_01445	cobyric acid synthase CobQ
PFDSM3638_01450	301130	301984	PF_RS01535	318028	318882	PF0302	PFDSM3638_01450	radical SAM protein
PFDSM3638_01455	301896	302891	PF_RS01540	318794	319789	PF0303	PFDSM3638_01455	TIGR00303 family protein
PFDSM3638_01460	302925	304253	PF_RS01545	319823	321151	PF0304	PFDSM3638_01460	ATP-binding protein
PFDSM3638_01465	304425	305006	PF_RS01550	321323	321904	PF0305	PFDSM3638_01465	adenosylcobinamide amidohydrolase
PFDSM3638_01470	305008	306033	PF_RS01555	321906	322931	PF0306	PFDSM3638_01470	threonylcarbamoyl-AMP synthase
PFDSM3638_01475	306030	307040	PF_RS01560	322928	323938	PF0307	PFDSM3638_01475	glycosyltransferase family 4 protein
PFDSM3638_01480	307167	308186	PF_RS01565	324065	325084	PF0308	PFDSM3638_01480	adenylosuccinate synthetase
PFDSM3638_01490	308376	309653	PF_RS01575	325274	326551	PF0309	PFDSM3638_01490	ABC transporter permease
PFDSM3638_01495	309646	310383	PF_RS01580	326544	327281	PF0310	PFDSM3638_01495	ABC transporter ATP-binding protein
PFDSM3638_01500	310380	310730	PF_RS01585	327278	327628	PF0311	PFDSM3638_01500	hypothetical protein
PFDSM3638_01505	310797	312164	PF_RS01590	327695	329062	PF0312	PFDSM3638_01505	ADP-dependent glucokinase
PFDSM3638_01510	312265	312729	PF_RS01595	329163	329627	-	PFDSM3638_01510	signal peptidase I
PFDSM3638_01515	312714	313292	PF_RS01600	329612	330190	PF0315	PFDSM3638_01515	DUF531 domain-containing protein
PFDSM3638_01520	313327	314379	PF_RS01605	330225	331277	PF0316	PFDSM3638_01520	hypothetical protein
PFDSM3638_01525	314376	315218	PF_RS01610	331274	332116	PF0317	PFDSM3638_01525	EamA/RhaT family transporter
PFDSM3638_01530	315252	317114	PF_RS01615	332150	334012	PF0318	PFDSM3638_01530	S9 family peptidase
PFDSM3638_01540	317162	318172	PF_RS01620	334060	335070	PF0319	PFDSM3638_01540	D-glycerate dehydrogenase
PFDSM3638_01545	318220	319197	PF_RS01625	335118	336095	PF0320	PFDSM3638_01545	hypothetical protein
PFDSM3638_01550	319169	320347	PF_RS01630	336067	337245	PF0321	PFDSM3638_01550	inosine-5-monophosphate dehydrogenase
PFDSM3638_01555	320448	320864	PF_RS01635	337346	337762	PF0322	PFDSM3638_01555	nickel-responsive transcriptional regulator NikR
PFDSM3638_01570	321340	321780	PF_RS01650	338238	338678	PF0323	PFDSM3638_01570	hypothetical protein
PFDSM3638_01575	321875	322480	PF_RS01655	338773	339378	PF0324	PFDSM3638_01575	DUF1102 domain-containing protein
PFDSM3638_01580	322497	323030	PF_RS01660	339395	339928	PF0325	PFDSM3638_01580	DUF1102 domain-containing protein
PFDSM3638_01585	323047	324042	PF_RS01665	339945	340940	PF0326	PFDSM3638_01585	signal peptidase I
PFDSM3638_01590	324039	324422	PF_RS01670	340937	341320	PF0327	PFDSM3638_01590	hypothetical protein
PFDSM3638_01595	324409	325332	PF_RS01675	341307	342230	PF0328	PFDSM3638_01595	hypothetical protein
PFDSM3638_01600	325280	327244	PF_RS01680	342178	344142	PF0329	PFDSM3638_01600	hypothetical protein
PFDSM3638_01605	327250	328956	PF_RS01685	344148	345854	PF0330	PFDSM3638_01605	flagellar assembly protein FlaJ
PFDSM3638_01610	328968	330581	PF_RS01690	345866	347479	PF0331	PFDSM3638_01610	hypothetical protein
PFDSM3638_01615	330602	331300	PF_RS01695	347500	348198	PF0332	PFDSM3638_01615	flagellar accessory protein FlaH
PFDSM3638_01620	331327	331809	PF_RS01700	348225	348707	PF0333	PFDSM3638_01620	flagellar protein G
PFDSM3638_01625	331809	332327	PF_RS01705	348707	349227	PF0334	PFDSM3638_01625	flagella
PFDSM3638_01630	332345	333553	PF_RS01710	349245	350453	PF0335	PFDSM3638_01630	flagellar protein D
PFDSM3638_01635	333557	334033	PF_RS01715	350457	350933	PF0336	PFDSM3638_01635	flagellar protein FlaC
PFDSM3638_01640	334044	334838	PF_RS01720	350944	351738	PF0337	PFDSM3638_01640	flagellin
PFDSM3638_01645	334848	335492	PF_RS01725	351748	352377	PF0338	PFDSM3638_01645	flagellin
PFDSM3638_01650	335554	336192	-	-	-	-	PFDSM3638_01650	flagellin
PFDSM3638_01655	336341	337291	PF_RS01730	352470	353420	PF0339	PFDSM3638_01655	methyltransferase
PFDSM3638_01660	337304	337630	PF_RS01735	353433	353759	PF0340	PFDSM3638_01660	transcriptional regulator
PFDSM3638_01665	337825	338793	PF_RS01740	353954	354922	PF0341	PFDSM3638_01665	hypothetical protein
PFDSM3638_01670	338765	339514	PF_RS01745	354894	355643	PF0342	PFDSM3638_01670	hypothetical protein
PFDSM3638_01675	339552	340817	PF_RS01750	355681	356946	PF0343	PFDSM3638_01675	adenosylhomocysteinase
PFDSM3638_01680	340858	341991	PF_RS01755	356987	358120	PF0344	PFDSM3638_01680	tungsten cofactor oxidoreductase radical SAM maturase
PFDSM3638_01685	341993	342241	PF_RS01760	358122	358370	PF0345	PFDSM3638_01685	MoaD/ThiS family protein
PFDSM3638_01690	342290	344107	PF_RS01765	358419	360236	PF0346	PFDSM3638_01690	aldehyde ferredoxin oxidoreductase
PFDSM3638_01695	344302	345096	-	-	-	-	PFDSM3638_01695	hypothetical protein
PFDSM3638_01710	345400	346101	PF_RS01785	361528	362229	PF0348	PFDSM3638_01710	IS6 family transposase ISPfu2
PFDSM3638_01715	346248	347156	PF_RS01990	396645	397553	PF0388	PFDSM3638_01715	hypothetical protein	Region inverted
PFDSM3638_01720	347153	347491	PF_RS01985	396310	396648	PF0387	PFDSM3638_01720	cupin domain-containing protein
PFDSM3638_01725	347495	348220	PF_RS01980	395581	396306	PF0386	PFDSM3638_01725	tRNA-binding protein
PFDSM3638_01730	348226	348552	PF_RS01975	395249	395575	PF0385	PFDSM3638_01730	hypothetical protein
PFDSM3638_01735	348557	349549	PF_RS01970	394252	395244	PF0384	PFDSM3638_01735	bifunctional oligoribonuclease/PAP phosphatase NrnA
PFDSM3638_01740	349506	349841	PF_RS01965	393960	394295	PF0383	PFDSM3638_01740	hypothetical protein
PFDSM3638_01745	349878	350231	PF_RS01960	393570	393923	PF0382	PFDSM3638_01745	prefoldin subunit beta
PFDSM3638_01750	350266	351186	PF_RS01955	392615	393535	PF0381	PFDSM3638_01750	hypothetical protein
PFDSM3638_01755	351235	351963	PF_RS01950	391838	392566	PF0380	PFDSM3638_01755	chromosome partitioning protein ParB
PFDSM3638_01760	352090	352245	PF_RS01945	391556	391711	PF0379	PFDSM3638_01760	50S ribosomal protein L39e
PFDSM3638_01765	352256	352543	PF_RS01940	391258	391545	PF0378	PFDSM3638_01765	50S ribosomal protein L31e
PFDSM3638_01770	352570	353253	PF_RS01935	390548	391231	PF0377	PFDSM3638_01770	translation initiation factor IF-6
PFDSM3638_01775	353267	353500	PF_RS01930	390301	390534	PF0376	PFDSM3638_01775	50S ribosomal protein L18a
PFDSM3638_01780	353525	353965	PF_RS01925	389836	390276	PF0375	PFDSM3638_01780	prefoldin subunit alpha
PFDSM3638_01785	353979	355172	PF_RS01920	388629	389822	PF0374	ychF	redox-regulated ATPase YchF
PFDSM3638_01790	355221	356198	PF_RS01915	387603	388580	PF0373	PFDSM3638_01790	ABC transporter substrate-binding protein
PFDSM3638_01795	356247	356756	PF_RS01910	387045	387554	PF0372	PFDSM3638_01795	molybdenum cofactor biosynthesis protein
PFDSM3638_01800	356907	358190	PF_RS01905	385611	386894	PF0371	PFDSM3638_01800	sodium-dependent transporter
PFDSM3638_01805	358390	359391	PF_RS01900	384410	385411	PF0370	PFDSM3638_01805	hydroxyacid dehydrogenase
PFDSM3638_01810	359405	360403	PF_RS01895	383398	384396	PF0369	PFDSM3638_01810	endoglucanase
PFDSM3638_01815	360415	361170	PF_RS01890	382631	383386	PF0368	PFDSM3638_01815	sulfite exporter TauE/SafE family protein
PFDSM3638_01820	361180	361980	PF_RS01885	381821	382621	PF0367	PFDSM3638_01820	hypothetical protein
PFDSM3638_01825	361977	362549	PF_RS01880	381252	381824	PF0366	PFDSM3638_01825	hypothetical protein
PFDSM3638_01830	362535	363449	PF_RS01875	380352	381266	PF0365	PFDSM3638_01830	DUF835 domain-containing protein
PFDSM3638_01835	363652	364587	PF_RS01870	379215	380150	PF0364	PFDSM3638_01835	tyrosine protein kinase
PFDSM3638_01840	364584	366917	PF_RS01865	376900	379218	PF0363	PFDSM3638_01840	beta-galactosidase
PFDSM3638_01845	366920	367897	PF_RS01860	375904	376881	PF0362	PFDSM3638_01845	SIS domain-containing protein
PFDSM3638_01850	367894	368859	PF_RS01855	374942	375907	PF0361	PFDSM3638_01850	ABC transporter ATP-binding protein
PFDSM3638_01855	368852	369826	PF_RS01850	373975	374949	PF0360	PFDSM3638_01855	ABC transporter ATP-binding protein
PFDSM3638_01860	369823	370737	PF_RS01845	373064	373978	PF0359	PFDSM3638_01860	ABC transporter permease
PFDSM3638_01865	370741	371733	PF_RS01840	372068	373060	PF0358	PFDSM3638_01865	ABC transporter permease
PFDSM3638_01870	371772	373664	PF_RS01835	370134	372029	PF0357	PFDSM3638_01870	CGP-CTERM sorting domain-containing protein
PFDSM3638_01875	373841	375292	PF_RS01830	368506	369957	PF0356	PFDSM3638_01875	beta-galactosidase
PFDSM3638_01880	375289	375498	PF_RS01825	368300	368509	PF0355.1n	PFDSM3638_01880	hypothetical protein
PFDSM3638_01885	375501	375950	PF_RS01820	367848	368297	PF0355	PFDSM3638_01885	VapC toxin family PIN domain ribonuclease
PFDSM3638_01890	375943	376746	PF_RS01815	367052	367855	PF0354	PFDSM3638_01890	PIG-L family deacetylase
PFDSM3638_01895	376872	378011	PF_RS01810	365787	366926	PF0353	PFDSM3638_01895	RNA ligase
PFDSM3638_01900	378191	379525	PF_RS01805	365038	365607	PF0352	cmr1	type III-B CRISPR module RAMP protein Cmr1
PFDSM3638_01900	378191	379525	PF_RS01800	364274	364954	PF0351	cmr1	type III-B CRISPR module RAMP protein Cmr1
PFDSM3638_01905	379766	380710	PF_RS01795	363090	364033	PF0350	PFDSM3638_01905	cation transporter
PFDSM3638_01910	380714	381400	PF_RS01790	362400	363074	PF0349	PFDSM3638_01910	hypothetical protein
PFDSM3638_01920	381677	382834	PF_RS02005	398596	399753	PF0390	PFDSM3638_01920	DUF521 domain-containing protein
PFDSM3638_01925	382834	383238	PF_RS02010	399753	400157	PF0391	PFDSM3638_01925	hypothetical protein
PFDSM3638_01930	383192	384445	PF_RS02015	400111	401364	PF0392	PFDSM3638_01930	site-2 protease family protein
PFDSM3638_01935	384516	385241	PF_RS02020	401435	402160	PF0393	cas6	CRISPR-associated endoribonuclease Cas6
PFDSM3638_01940	385225	386121	PF_RS02025	402144	403040	PF0394	PFDSM3638_01940	UDP-N-acetylglucosamine--dolichyl-phosphate N-acetylglucosaminephosphotransferase
PFDSM3638_01945	386111	386641	PF_RS02030	403030	403560	PF0395	PFDSM3638_01945	HD family hydrolase
PFDSM3638_01950	386652	386963	PF_RS02035	403571	403882	-	PFDSM3638_01950	GTP-binding protein
PFDSM3638_01955	387022	387582	PF_RS02040	403941	404501	PF0397	PFDSM3638_01955	GTP-binding protein
PFDSM3638_01960	387583	388086	PF_RS02045	404502	405005	PF0398	PFDSM3638_01960	hypothetical protein
PFDSM3638_01965	388088	390310	PF_RS02050	405007	407229	PF0399	PFDSM3638_01965	multidrug transporter
PFDSM3638_01970	390323	391312	PF_RS02055	407242	408231	PF0400	PFDSM3638_01970	TIGR01177 family methyltransferase
PFDSM3638_01975	391348	391926	PF_RS02060	408267	408845	PF0401	PFDSM3638_01975	methyltransferase
PFDSM3638_01980	392047	392997	PF_RS02065	408966	409916	PF0402	PFDSM3638_01980	UDP-glucose 4-epimerase
PFDSM3638_01985	393003	393518	PF_RS02070	409922	410437	PF0403	PFDSM3638_01985	hypothetical protein
PFDSM3638_01990	393515	394771	PF_RS02075	410434	411690	PF0404	PFDSM3638_01990	DUF58 domain-containing protein
PFDSM3638_01995	394768	395700	PF_RS02080	411687	412619	PF0405	PFDSM3638_01995	MoxR family ATPase
PFDSM3638_02000	395651	396715	PF_RS02085	412570	413634	PF0406	PFDSM3638_02000	DUF4350 domain-containing protein
PFDSM3638_02005	396712	398475	PF_RS02090	413631	415454	PF0407	PFDSM3638_02005	hypothetical protein
PFDSM3638_02005	396712	398475	PF_RS02095	415421	416122	PF0408	PFDSM3638_02005	hypothetical protein
PFDSM3638_02010	398536	399306	PF_RS02100	416244	417014	PF0409	PFDSM3638_02010	hypothetical protein
PFDSM3638_02015	399317	399559	PF_RS02105	417025	417267	PF0410	PFDSM3638_02015	hypothetical protein
PFDSM3638_02020	399556	401787	PF_RS02110	417264	419495	PF0411	PFDSM3638_02020	oligosaccharyl transferase, STT3 subunit
PFDSM3638_02025	401784	402788	PF_RS02115	419492	420496	PF0412	PFDSM3638_02025	mechanosensitive ion channel family protein
PFDSM3638_02030	402792	403415	PF_RS02120	420500	421123	PF0413	PFDSM3638_02030	DUF432 domain-containing protein
PFDSM3638_02035	403469	403954	PF_RS02125	421177	421662	PF0414	PFDSM3638_02035	hypothetical protein
PFDSM3638_02040	403913	405100	PF_RS02130	421621	422808	PF0415	PFDSM3638_02040	dehydrogenase
PFDSM3638_02045	405103	405918	PF_RS02135	422811	423626	PF0416	PFDSM3638_02045	hypothetical protein
PFDSM3638_02050	405915	407114	PF_RS02140	423623	424822	PF0417	PFDSM3638_02050	DUF58 domain-containing protein
PFDSM3638_02055	407124	408077	PF_RS02145	424832	425785	PF0418	PFDSM3638_02055	MoxR family ATPase
PFDSM3638_02060	408067	409053	PF_RS02150	425775	426761	PF0419	PFDSM3638_02060	hypothetical protein
PFDSM3638_02065	409035	411893	PF_RS02155	426743	429601	PF0420	PFDSM3638_02065	hypothetical protein
PFDSM3638_02070	411949	413091	PF_RS02160	429657	430799	PF0421	PFDSM3638_02070	5-formaminoimidazole-4-carboxamide-1-(beta)-D- ribofuranosyl 5'-monophosphate synthetase
PFDSM3638_02075	413103	414419	PF_RS02165	430811	432127	PF0422	purD	phosphoribosylamine--glycine ligase
PFDSM3638_02080	414598	415247	PF_RS02170	432443	432961	PF0424	PFDSM3638_02080	hypothetical protein
PFDSM3638_02085	415250	416014	PF_RS02175	432964	433728	PF0425	PFDSM3638_02085	hypothetical protein
PFDSM3638_02090	416076	417194	PF_RS02180	433790	434908	PF0426	PFDSM3638_02090	5-(carboxyamino)imidazole ribonucleotide synthase
PFDSM3638_02095	417187	417699	PF_RS02185	434901	435413	PF0427	purE	5-(carboxyamino)imidazole ribonucleotide mutase
PFDSM3638_02100	417784	418233	PF_RS02190	435498	435947	PF0428	PFDSM3638_02100	alanyl-tRNA editing protein AlaX
PFDSM3638_02105	418255	419736	PF_RS02195	435969	437450	PF0429	PFDSM3638_02105	sodium/proline symporter
PFDSM3638_02110	419963	420599	PF_RS10530	437677	438313	-	PFDSM3638_02110	IS6 family transposase
PFDSM3638_02115	420699	421988	PF_RS02200	438413	439702	PF0430	PFDSM3638_02115	phosphoribosylglycinamide formyltransferase 2
PFDSM3638_02120	422124	423128	PF_RS02205	439838	440842	PF0431	PFDSM3638_02120	phosphoribosylformylglycinamidine cyclo-ligase
PFDSM3638_02125	423152	423973	PF_RS02210	440866	441687	PF0432	PFDSM3638_02125	HAD family hydrolase
PFDSM3638_02130	424320	424475	PF_RS02215	442034	442189	PF0433	PFDSM3638_02130	chemotaxis protein
PFDSM3638_02135	424491	424808	PF_RS02220	442205	442522	-	PFDSM3638_02135	hypothetical protein
PFDSM3638_02140	425207	425554	PF_RS02225	442921	443268	PF0432.3n	PFDSM3638_02140	hypothetical protein
PFDSM3638_02145	425555	426922	PF_RS02230	443269	444636	PF0435	PFDSM3638_02145	ATP-binding protein
PFDSM3638_02150	427396	427660	PF_RS10535	445110	445374	-	PFDSM3638_02150	hypothetical protein
PFDSM3638_02155	427705	428679	PF_RS02235	445419	446393	PF0436	PFDSM3638_02155	galactose oxidase
PFDSM3638_02160	428681	429979	PF_RS02240	446395	447693	PF0437	PFDSM3638_02160	hypothetical protein
PFDSM3638_02165	430022	430273	PF_RS02245	447736	447987	PF0437.1n	PFDSM3638_02165	hypothetical protein
PFDSM3638_02170	430605	430931	PF_RS02250	448319	448645	PF0438	PFDSM3638_02170	hypothetical protein
PFDSM3638_02175	431433	432569	PF_RS02255	449147	450282	PF0439	PFDSM3638_02175	hypothetical protein
PFDSM3638_02180	433586	433813	PF_RS02260	451299	451526	PF0439.3n	PFDSM3638_02180	hypothetical protein
PFDSM3638_02185	434046	439268	PF_RS02265	451759	456981	PF0440	PFDSM3638_02185	intein-containing adenosylcobalamin-dependent ribonucleoside-diphosphate reductase
PFDSM3638_02190	439475	440458	PF_RS02270	457188	458171	PF0441	galT	galactose-1-phosphate uridylyltransferase
PFDSM3638_02195	440515	441780	PF_RS02275	458228	459493	PF0442	PFDSM3638_02195	glycoside hydrolase family 1 protein
PFDSM3638_02200	441769	443100	PF_RS02280	459482	460813	PF0443	PFDSM3638_02200	MFS transporter
PFDSM3638_02205	443087	444181	PF_RS02285	460800	461894	PF0444	PFDSM3638_02205	hydrolase
PFDSM3638_02210	444178	445236	PF_RS02290	461891	462949	PF0445	PFDSM3638_02210	galactokinase
PFDSM3638_02215	445278	445844	PF_RS02295	462991	463557	PF0446	PFDSM3638_02215	glucose-1-phosphate thymidylyltransferase
PFDSM3638_02220	445849	446550	PF_RS02300	463562	464263	PF0447	PFDSM3638_02220	IS6 family transposase ISPfu2
PFDSM3638_02225	446608	447069	PF_RS02305	464321	464782	PF0448	PFDSM3638_02225	hypothetical protein
PFDSM3638_02230	447131	448009	PF_RS02310	464844	465722	PF0449	PFDSM3638_02230	transporter
PFDSM3638_02235	448006	449325	PF_RS02315	465719	467038	PF0450	glnA	glutamine synthetase
PFDSM3638_02240	449484	449762	PF_RS02320	467197	467475	PF0451	PFDSM3638_02240	hypothetical protein
PFDSM3638_02245	449765	450175	PF_RS02325	467478	467888	PF0452	PFDSM3638_02245	hypothetical protein
PFDSM3638_02250	450185	451768	PF_RS02330	467898	469481	PF0453	PFDSM3638_02250	hypothetical protein
PFDSM3638_02255	451874	452986	PF_RS02335	469587	470699	PF0454	PFDSM3638_02255	NAD(P)/FAD-dependent oxidoreductase
PFDSM3638_02260	452997	453329	PF_RS02340	470710	471042	PF0455	PFDSM3638_02260	ASCH domain-containing protein
PFDSM3638_02265	453326	454825	PF_RS02345	471039	472538	PF0456	PFDSM3638_02265	carboxypeptidase M32
PFDSM3638_02270	454930	455496	PF_RS02350	472643	473209	PF0457	PFDSM3638_02270	metalloprotease
PFDSM3638_02275	455507	456073	PF_RS02355	473220	473786	PF0458	PFDSM3638_02275	nicotinamide-nucleotide adenylyltransferase
PFDSM3638_02280	456079	456852	PF_RS02360	473792	474565	PF0459	PFDSM3638_02280	hydroxide adenosyltransferase
PFDSM3638_02285	456925	458529	PF_RS02365	474638	476242	PF0460	PFDSM3638_02285	hypothetical protein
PFDSM3638_02290	458545	459126	PF_RS02370	476258	476839	PF0461	PFDSM3638_02290	tRNA (cytidine(56)-2'-O)-methyltransferase
PFDSM3638_02295	459074	459637	PF_RS02375	476787	477350	PF0462	PFDSM3638_02295	hypothetical protein
PFDSM3638_02305	459684	460388	PF_RS02380	477397	478101	PF0463	PFDSM3638_02305	TIGR02253 family HAD-type hydrolase
PFDSM3638_02310	460429	462390	PF_RS02385	478142	480103	PF0464	PFDSM3638_02310	glyceraldehyde-3-phosphate:ferredoxin oxidoreductase
PFDSM3638_02315	462440	463492	PF_RS02390	480153	481205	PF0465	PFDSM3638_02315	glycosyl transferase
PFDSM3638_02320	463482	463772	PF_RS02395	481195	481485	PF0466	PFDSM3638_02320	hypothetical protein
PFDSM3638_02325	463759	466845	PF_RS02400	481472	484558	PF0467	PFDSM3638_02325	ATP-dependent protease LonB
PFDSM3638_02330	466901	467269	PF_RS02405	484614	484982	PF0468	PFDSM3638_02330	metalloprotease
PFDSM3638_02335	467266	467838	PF_RS02410	484979	485551	PF0469	PFDSM3638_02335	ASCH domain-containing protein
PFDSM3638_02340	467835	468176	PF_RS02415	485548	485889	PF0470	PFDSM3638_02340	ASCH domain-containing protein
PFDSM3638_02345	468250	469443	PF_RS02420	485963	487156	PF0471	PFDSM3638_02345	transposase
PFDSM3638_02350	469457	469621	PF_RS10545	487170	487333	PF0472	PFDSM3638_02350	class III signal peptide-containing protein
PFDSM3638_02355	469693	470355	PF_RS02425	487405	488067	PF0473	PFDSM3638_02355	Kae1-associated kinase Bud32
PFDSM3638_02360	470345	472033	PF_RS02430	488057	489745	PF0474	PFDSM3638_02360	DNA mismatch repair protein
PFDSM3638_02365	472030	472860	PF_RS02435	489742	490572	PF0475	PFDSM3638_02365	translation initiation factor IF-2B subunit alpha
PFDSM3638_02370	472860	473618	PF_RS02440	490572	491330	PF0476	PFDSM3638_02370	damage-inducible protein CinA
PFDSM3638_02375	473769	475151	PF_RS02445	491481	492863	PF0477	PFDSM3638_02375	alpha-amylase
PFDSM3638_02380	475077	477245	PF_RS02450	492789	494861	PF0478	PFDSM3638_02380	alpha-amylase
PFDSM3638_02385	477319	478716	PF_RS02455	495032	496429	PF0479	PFDSM3638_02385	hypothetical protein
PFDSM3638_02390	478876	479649	PF_RS02460	496589	497362	PF0480	PFDSM3638_02390	alpha/beta hydrolase
PFDSM3638_02395	479800	480222	PF_RS02465	497513	497935	PF0481	PFDSM3638_02395	translation initiation factor IF-2 subunit beta
PFDSM3638_02400	480265	483414	PF_RS02470	497978	501127	PF0482	PFDSM3638_02400	cell division protein
PFDSM3638_02405	483416	483904	PF_RS02475	501129	501617	PF0483	PFDSM3638_02405	hypothetical protein
PFDSM3638_02410	483957	484703	PF_RS02480	501670	502416	PF0484	PFDSM3638_02410	GTPase
PFDSM3638_02415	484751	485488	PF_RS02485	502464	503201	PF0485	PFDSM3638_02415	septum site-determining protein MinD
PFDSM3638_02420	485602	486456	PF_RS02490	503315	504169	PF0486	PFDSM3638_02420	EamA family transporter
PFDSM3638_02425	486443	487444	PF_RS02495	504156	505157	PF0487	PFDSM3638_02425	hypothetical protein
PFDSM3638_02430	487634	488011	PF_RS02500	505347	505724	PF0488	PFDSM3638_02430	30S ribosomal protein S6e
PFDSM3638_02435	488108	488905	PF_RS02505	505821	506618	PF0489	PFDSM3638_02435	hypothetical protein
PFDSM3638_02440	488902	489633	PF_RS02510	506615	507346	PF0490	PFDSM3638_02440	DUF2110 domain-containing protein
PFDSM3638_02445	489651	490238	PF_RS02515	507364	507951	PF0491	tfe	transcription factor E
PFDSM3638_02450	490355	490636	PF_RS02520	508068	508349	PF0492	PFDSM3638_02450	hypothetical protein
PFDSM3638_02460	490877	492856	PF_RS02530	508590	510569	PF0493	PFDSM3638_02460	DUF460 domain-containing protein
PFDSM3638_02465	492853	496035	PF_RS02535	510566	513748	PF0494	PFDSM3638_02465	intein-containing DNA topoisomerase I
PFDSM3638_02470	496119	499763	PF_RS02540	513832	517476	PF0495	PFDSM3638_02470	reverse gyrase
PFDSM3638_02475	499976	500770	PF_RS02545	517689	518483	PF0496	PFDSM3638_02475	transcriptional regulator
PFDSM3638_02480	500875	501087	PF_RS02550	518588	518800	PF0497	PFDSM3638_02480	ArsR family transcriptional regulator
PFDSM3638_02485	501084	501401	PF_RS02555	518797	519114	PF0498	PFDSM3638_02485	hypothetical protein
PFDSM3638_02490	501398	502111	PF_RS02560	519111	519824	PF0499	PFDSM3638_02490	arginase
PFDSM3638_02495	502116	502952	PF_RS02565	519829	520665	PF0500	PFDSM3638_02495	class I SAM-dependent methyltransferase family protein
PFDSM3638_02500	502921	503475	PF_RS02570	520634	521188	PF0501	PFDSM3638_02500	NTPase
PFDSM3638_02505	503506	504222	PF_RS02575	521219	521935	PF0502	PFDSM3638_02505	ABC transporter ATP-binding protein
PFDSM3638_02510	504215	505210	PF_RS02580	521928	522923	PF0503	PFDSM3638_02510	iron ABC transporter permease
PFDSM3638_02515	505240	507690	PF_RS02585	522953	525403	PF0504	PFDSM3638_02515	tRNA(Met) cytidine acetyltransferase
PFDSM3638_02520	507730	508278	PF_RS02590	525443	525991	PF0505	PFDSM3638_02520	helix-turn-helix domain-containing protein
PFDSM3638_02525	508388	508570	PF_RS02595	526101	526284	-	PFDSM3638_02525	class III signal peptide-containing protein
PFDSM3638_02530	508657	508851	PF_RS02600	526371	526565	PF0507	PFDSM3638_02530	hypothetical protein
PFDSM3638_02535	508841	510868	PF_RS02605	526555	528582	PF0508	PFDSM3638_02535	integral membrane glycosyltransferase
PFDSM3638_02540	510874	512976	PF_RS02610	528588	530690	PF0509	PFDSM3638_02540	integral membrane glycosyltransferase
PFDSM3638_02545	512973	513263	PF_RS02615	530687	530977	PF0510	PFDSM3638_02545	nucleotide pyrophosphohydrolase
PFDSM3638_02550	513260	514078	PF_RS02620	530974	531792	PF0511	PFDSM3638_02550	DNA-3-methyladenine glycosylase 2 family protein
PFDSM3638_02555	514204	514728	PF_RS02625	531918	532442	PF0512	PFDSM3638_02555	transcriptional regulator
PFDSM3638_02560	514729	516108	PF_RS02630	532443	533822	PF0513	PFDSM3638_02560	aspartate aminotransferase family protein
PFDSM3638_02565	516167	517720	PF_RS02635	533881	535434	PF0514	PFDSM3638_02565	sodium:alanine symporter family protein
PFDSM3638_02570	517857	518660	PF_RS02640	535571	536374	PF0515	PFDSM3638_02570	DUF4129 domain-containing protein
PFDSM3638_02575	518650	519069	PF_RS02645	536364	536783	PF0516	PFDSM3638_02575	hypothetical protein
PFDSM3638_02580	519056	520000	PF_RS02650	536770	537714	PF0517	PFDSM3638_02580	MoxR family ATPase
PFDSM3638_02585	520011	521234	PF_RS02655	537725	538948	PF0518	PFDSM3638_02585	DUF58 domain-containing protein
PFDSM3638_02590	521228	521641	PF_RS02660	538942	539355	PF0519	PFDSM3638_02590	hypothetical protein
PFDSM3638_02595	521634	522824	PF_RS02665	539348	540538	PF0520	PFDSM3638_02595	MFS transporter
PFDSM3638_02600	522835	523095	PF_RS02670	540549	540809	PF0521	PFDSM3638_02600	hypothetical protein
PFDSM3638_02605	523106	524278	PF_RS02675	540820	541992	PF0522	PFDSM3638_02605	aromatic amino acid aminotransferase
PFDSM3638_02610	524440	524868	PF_RS02680	542154	542582	PF0523	PFDSM3638_02610	hypothetical protein
PFDSM3638_02615	525072	525260	PF_RS02685	542786	542974	PF0524	PFDSM3638_02615	ribbon-helix-helix protein, CopG family
PFDSM3638_02620	525279	526505	PF_RS02690	542993	544219	PF0525	ftsZ	cell division protein FtsZ
PFDSM3638_02625	526552	527328	PF_RS02695	544265	545041	PF0526	PFDSM3638_02625	ParA family protein
PFDSM3638_02630	527309	527650	PF_RS02700	545022	545363	PF0527	PFDSM3638_02630	CopG family transcriptional regulator
PFDSM3638_02635	527630	528439	PF_RS02705	545343	546152	PF0528	PFDSM3638_02635	cobalt ABC transporter ATP-binding protein
PFDSM3638_02640	528436	529089	PF_RS02710	546149	546802	PF0529	PFDSM3638_02640	cobalt ABC transporter permease
PFDSM3638_02645	529092	529343	PF_RS02715	546805	547056	PF0530	PFDSM3638_02645	cobalt transporter
PFDSM3638_02650	529340	529954	PF_RS02720	547053	547667	PF0531	PFDSM3638_02650	cobalamin biosynthesis protein
PFDSM3638_02655	530130	531503	PF_RS02725	547843	549216	PF0532	PFDSM3638_02655	acetyl-CoA synthetase
PFDSM3638_02660	531496	533436	PF_RS02730	549209	551149	PF0533	iorA	indolepyruvate ferredoxin oxidoreductase subunit alpha
PFDSM3638_02665	533439	534047	PF_RS02735	551152	551790	PF0534	iorB	indolepyruvate ferredoxin oxidoreductase subunit beta
PFDSM3638_02670	534137	534565	PF_RS02740	551853	552281	PF0535	PFDSM3638_02670	transcriptional regulator
PFDSM3638_02680	534837	535538	PF_RS02745	552553	553254	PF0536	PFDSM3638_02680	IS6 family transposase ISPfu5
PFDSM3638_02685	535964	538276	PF_RS02750	553680	555992	PF0537	PFDSM3638_02685	hypothetical protein
PFDSM3638_02695	539156	540592	PF_RS02760	556872	558308	PF0538	PFDSM3638_02695	hypothetical protein
PFDSM3638_02700	540699	541570	PF_RS10555	558415	559286	PF0539	PFDSM3638_02700	IS982 family transposase ISPfu3
PFDSM3638_02705	541715	542449	PF_RS02775	559431	560165	PF0540	PFDSM3638_02705	thymidylate synthase (FAD)
PFDSM3638_02710	542650	543537	PF_RS02780	560366	561253	PF0541	PFDSM3638_02710	type II methionyl aminopeptidase
PFDSM3638_02720	543694	544899	PF_RS02790	561410	562615	PF0542	PFDSM3638_02720	molybdopterin molybdenumtransferase MoeA
PFDSM3638_02725	544911	545183	PF_RS02795	562627	562899	PF0543	moaD	molybdopterin converting factor subunit 1
PFDSM3638_02730	545180	545581	PF_RS02800	562896	563297	PF0544	PFDSM3638_02730	hypothetical protein
PFDSM3638_02735	545574	545867	PF_RS02805	563290	563583	PF0545	PFDSM3638_02735	hypothetical protein
PFDSM3638_02740	545827	547119	PF_RS02810	563543	564835	PF0546	PFDSM3638_02740	hypothetical protein
PFDSM3638_02745	547339	548685	PF_RS02815	565055	566401	PF0547	PFDSM3638_02745	GTPase
PFDSM3638_02750	548926	549153	PF_RS02820	566642	566869	PF0548	hypC	HypC/HybG/HupF family hydrogenase formation chaperone
PFDSM3638_02755	549154	550257	PF_RS02825	566870	567973	PF0549	PFDSM3638_02755	hydrogenase formation protein HypD
PFDSM3638_02760	550306	551004	PF_RS02830	568021	568720	-	PFDSM3638_02760	nitroreductase
PFDSM3638_02765	551008	551187	PF_RS10560	568724	568903	PF0551	PFDSM3638_02765	hypothetical protein
PFDSM3638_02770	551189	552292	PF_RS02835	568931	570007	PF0552	arsB	arsenical-resistance protein
PFDSM3638_02775	552433	552882	PF_RS02840	570148	570597	PF0553	PFDSM3638_02775	arsenate reductase ArsC
PFDSM3638_02780	553169	554158	PF_RS02845	570884	571873	PF0554	PFDSM3638_02780	gfo/Idh/MocA family oxidoreductase
PFDSM3638_02785	554217	555167	PF_RS02850	571932	572882	PF0555	PFDSM3638_02785	hypothetical protein
PFDSM3638_02790	555186	555755	PF_RS02855	572901	573470	PF0556	PFDSM3638_02790	hypothetical protein
PFDSM3638_02795	555949	556731	PF_RS02860	573664	574446	PF0557	PFDSM3638_02795	3-oxoacyl-ACP reductase
PFDSM3638_02800	556918	557805	PF_RS02865	574633	575520	PF0558	PFDSM3638_02800	cation transporter
PFDSM3638_02805	557896	560217	PF_RS02870	575611	577932	PF0559	hypF	carbamoyltransferase HypF
PFDSM3638_02810	560248	561150	PF_RS02875	577963	578865	PF0560	PFDSM3638_02810	hypothetical protein
PFDSM3638_02815	561253	561756	PF_RS02880	578968	579471	PF0561	PFDSM3638_02815	hypothetical protein
PFDSM3638_02820	561813	562514	PF_RS02885	579528	580229	PF0562	PFDSM3638_02820	IS6 family transposase
PFDSM3638_02825	562522	563487	PF_RS02890	580237	581202	PF0563	PFDSM3638_02825	hypothetical protein
PFDSM3638_02835	563546	566368	PF_RS02895	581261	584083	PF0564	PFDSM3638_02835	ATP-dependent helicase
PFDSM3638_02840	566365	566793	PF_RS02900	584080	584508	PF0565	PFDSM3638_02840	hypothetical protein
PFDSM3638_02845	566793	570110	PF_RS02905	584508	587825	PF0566	PFDSM3638_02845	DUF499 domain-containing protein
PFDSM3638_02850	570107	573098	PF_RS02910	587822	590813	PF0567	PFDSM3638_02850	hypothetical protein
PFDSM3638_02855	573158	573583	PF_RS02915	590873	591298	PF0569	PFDSM3638_02855	DUF365 domain-containing protein
PFDSM3638_02860	573564	574681	PF_RS02920	591279	592396	-	PFDSM3638_02860	hypothetical protein
PFDSM3638_02865	574837	576804	PF_RS02925	592552	594519	PF0572	PFDSM3638_02865	IGHMBP2 family helicase
PFDSM3638_02870	576881	577108	PF_RS02930	594596	594823	PF0573	PFDSM3638_02870	AbrB family transcriptional regulator
PFDSM3638_02875	577096	577497	PF_RS02935	594811	595212	PF0574	PFDSM3638_02875	PIN domain-containing protein
PFDSM3638_02880	577600	577842	PF_RS10570	595359	595502	-	PFDSM3638_02880	hypothetical protein
PFDSM3638_02885	577956	578294	PF_RS02940	595671	596009	PF0575	PFDSM3638_02885	PIN domain-containing protein
PFDSM3638_02890	578281	578473	PF_RS02945	595996	596188	PF0576	PFDSM3638_02890	antitoxin
PFDSM3638_02895	578584	579435	PF_RS02950	596299	597150	PF0577	PFDSM3638_02895	ABC transporter ATP-binding protein
PFDSM3638_02900	579432	580133	PF_RS02955	597147	597848	PF0578	PFDSM3638_02900	hypothetical protein
PFDSM3638_02905	580130	580822	PF_RS02960	597845	598537	PF0579	PFDSM3638_02905	permease
PFDSM3638_02910	581083	582084	PF_RS02965	598798	599799	PF0580	PFDSM3638_02910	hypothetical protein
PFDSM3638_02915	582317	583639	PF_RS02970	600032	601354	PF0581	PFDSM3638_02915	hypothetical protein
PFDSM3638_02920	583747	584511	PF_RS02975	601462	602226	PF0582	PFDSM3638_02920	ABC transporter
PFDSM3638_02925	584508	585473	PF_RS02980	602223	603188	PF0583	PFDSM3638_02925	DrrA-related ABC transporter ATP-binding protein
PFDSM3638_02930	585442	585927	PF_RS02985	603157	603642	PF0584	PFDSM3638_02930	PadR family transcriptional regulator
PFDSM3638_02935	585992	587299	PF_RS02990	603707	605014	PF0585	PFDSM3638_02935	ATPase
PFDSM3638_02940	587703	588302	PF_RS02995	605418	606017	PF0586	PFDSM3638_02940	hypothetical protein
PFDSM3638_02945	588295	588909	PF_RS03000	606010	606624	PF0587	PFDSM3638_02945	hypothetical protein
PFDSM3638_02950	589090	590457	PF_RS03005	606805	608172	PF0588	glmM	phosphoglucosamine mutase
PFDSM3638_02955	590498	591883	PF_RS03010	608213	609598	PF0589	PFDSM3638_02955	mannose-1-phosphate guanylyltransferase/mannose-6-phosphate isomerase
PFDSM3638_02960	591897	592625	PF_RS03015	609612	610340	PF0590	PFDSM3638_02960	mannosyl-3-phosphoglycerate phosphatase
PFDSM3638_02965	592622	593806	PF_RS03020	610337	611521	PF0591	PFDSM3638_02965	mannosyl-3-phosphoglycerate synthase
PFDSM3638_02970	593848	596451	PF_RS03025	611563	614166	PF0592	PFDSM3638_02970	hypothetical protein
PFDSM3638_02975	596448	597380	PF_RS03030	614163	615095	PF0593	PFDSM3638_02975	hypothetical protein
PFDSM3638_02980	597439	598386	PF_RS03035	615154	616101	PF0594	argF	ornithine carbamoyltransferase
PFDSM3638_02985	598487	599296	PF_RS03040	616202	617011	PF0595	PFDSM3638_02985	diphthine synthase
PFDSM3638_02990	599296	600123	PF_RS03045	617011	617838	PF0596	PFDSM3638_02990	mRNA 3'-end processing factor
PFDSM3638_02995	600172	601320	PF_RS03050	617887	619035	PF0597	PFDSM3638_02995	amidohydrolase
PFDSM3638_03000	601310	601768	PF_RS03055	619025	619483	PF0598	PFDSM3638_03000	aspartate carbamoyltransferase regulatory subunit
PFDSM3638_03005	601769	602695	PF_RS03060	619484	620410	PF0599	PFDSM3638_03005	aspartate carbamoyltransferase
PFDSM3638_03010	602787	603845	PF_RS03065	620502	621560	PF0600	PFDSM3638_03010	hypothetical protein
PFDSM3638_03015	603842	604729	PF_RS03070	621557	622444	PF0601	PFDSM3638_03015	phosphomethylpyrimidine kinase
PFDSM3638_03020	604765	605283	PF_RS03075	622480	622998	PF0602	PFDSM3638_03020	flavin reductase family protein
PFDSM3638_03025	607978	608445	PF_RS03080	625693	626160	PF0603	PFDSM3638_03025	hypothetical protein
PFDSM3638_03030	608432	609442	PF_RS03085	626147	627157	PF0604	hypE	hydrogenase expression/formation protein HypE
PFDSM3638_03035	609517	610388	PF_RS10575	627232	628103	PF0605	PFDSM3638_03035	IS982 family transposase
PFDSM3638_03040	610433	611635	PF_RS03100	628148	629350	PF0606	PFDSM3638_03040	MFS transporter
PFDSM3638_03045	611661	612326	PF_RS03105	629376	630041	PF0607	PFDSM3638_03045	TBP-interacting protein
PFDSM3638_03050	612336	613463	PF_RS03110	630051	631178	PF0608	PFDSM3638_03050	NAD-dependent alcohol dehydrogenase
PFDSM3638_03055	613453	613830	PF_RS03115	631168	631545	PF0609	PFDSM3638_03055	hypothetical protein
PFDSM3638_03060	613811	614104	PF_RS03120	631526	631819	PF0610	PFDSM3638_03060	transcriptional regulator
PFDSM3638_03065	614157	615302	PF_RS03125	631872	633017	PF0611	PFDSM3638_03065	DUF763 domain-containing protein
PFDSM3638_03070	615292	616083	PF_RS03130	633007	633798	PF0612	PFDSM3638_03070	extradiol dioxygenase
PFDSM3638_03075	616327	617454	PF_RS03135	634042	635169	PF0613	PFDSM3638_03075	fructose 1,6-bisphosphatase
PFDSM3638_03080	617509	617907	PF_RS03140	635224	635622	PF0614	PFDSM3638_03080	inosine-5-monophosphate dehydrogenase
PFDSM3638_03085	617958	618377	PF_RS03145	635673	636092	PF0615	hypA	hydrogenase nickel insertion protein HypA
PFDSM3638_03090	618374	619099	PF_RS03150	636089	636814	PF0616	PFDSM3638_03090	ATP-binding protein
PFDSM3638_03095	619112	619588	PF_RS03155	636827	637303	PF0617	hycI	hydrogenase maturation peptidase HycI
PFDSM3638_03100	619553	620143	PF_RS03160	637268	637858	PF0618	PFDSM3638_03100	molybdenum cofactor guanylyltransferase
PFDSM3638_03105	620137	620541	PF_RS03165	637852	638256	PF0619	PFDSM3638_03105	DUF296 domain-containing protein
PFDSM3638_03110	620598	620924	PF_RS03170	638313	638639	PF0620	PFDSM3638_03110	hypothetical protein
PFDSM3638_03115	620921	621772	PF_RS03175	638636	639486	PF0621	PFDSM3638_03115	transcriptional regulator
PFDSM3638_03120	621773	622273	PF_RS03180	639487	639987	PF0623	PFDSM3638_03120	hypothetical protein
PFDSM3638_03125	622672	623133	PF_RS03185	640386	640847	PF0624	PFDSM3638_03125	DUF1931 domain-containing protein
PFDSM3638_03130	623351	624710	PF_RS03190	641065	642424	-	PFDSM3638_03130	circadian clock KaiC-like protein
PFDSM3638_03135	624703	624999	PF_RS03195	642417	642713	PF0628	PFDSM3638_03135	DUF3227 domain-containing protein
PFDSM3638_03140	625005	625673	PF_RS03200	642719	643387	PF0629	PFDSM3638_03140	hypothetical protein
PFDSM3638_03145	625670	625849	PF_RS03205	643384	643563	PF0630	PFDSM3638_03145	hypothetical protein
PFDSM3638_03150	625883	626896	PF_RS03210	643597	644610	PF0631	PFDSM3638_03150	radical SAM protein
PFDSM3638_03155	626940	627701	PF_RS03215	644654	645415	PF0632	PFDSM3638_03155	hypothetical protein
PFDSM3638_03160	627725	628180	PF_RS03220	645439	645894	PF0633	PFDSM3638_03160	flavodoxin
PFDSM3638_03165	628173	629549	PF_RS03225	645887	647263	PF0634	PFDSM3638_03165	ATP-binding protein
PFDSM3638_03170	629609	630958	PF_RS03230	647323	648672	PF0635	PFDSM3638_03170	ATP-binding protein
PFDSM3638_03175	631051	632421	PF_RS03235	648765	650135	PF0636	PFDSM3638_03175	ATP-binding protein
PFDSM3638_03180	632486	633532	PF_RS03240	650200	651246	PF0637	cas8a2	type I-A CRISPR-associated protein Cas8a2/Csa4
PFDSM3638_03185	633529	634677	PF_RS03245	651243	652391	PF0638	cas8a2	type I-A CRISPR-associated protein Cas8a2/Csa4
PFDSM3638_03190	634690	635403	PF_RS03250	652404	653117	PF0639	PFDSM3638_03190	CRISPR-associated endonuclease Cas3''
PFDSM3638_03195	635400	637376	PF_RS03255	653114	655090	PF0640	cas3	CRISPR-associated helicase Cas3'
PFDSM3638_03200	637346	638137	PF_RS03260	655060	655851	PF0641	cas5a	type I-A CRISPR-associated protein Cas5
PFDSM3638_03205	638138	639163	PF_RS03265	655852	656877	PF0642	cas7a	type I-A CRISPR-associated protein Cas7/Csa2
PFDSM3638_03210	639160	639522	PF_RS03270	656874	657236	PF0643	PFDSM3638_03210	hypothetical protein
PFDSM3638_03215	639650	640312	PF_RS03275	657364	658026	PF0644	PFDSM3638_03215	CRISPR locus-related DNA-binding protein
PFDSM3638_03220	640434	640733	PF_RS03280	658148	658447	PF0645	PFDSM3638_03220	hypothetical protein
PFDSM3638_03225	641066	641416	PF_RS03285	658780	659130	PF0646	PFDSM3638_03225	gamma-glutamylcyclotransferase
PFDSM3638_03230	642082	643728	PF_RS03290	659796	661442	PF0647	PFDSM3638_03230	radical SAM/SPASM domain-containing protein
PFDSM3638_03235	643867	644217	PF_RS03295	661581	661931	PF0648	PFDSM3638_03235	hypothetical protein
PFDSM3638_03240	644252	644719	PF_RS03300	661966	662433	PF0649	PFDSM3638_03240	transcriptional regulator
PFDSM3638_03245	644825	645811	PF_RS03305	662539	663525	PF0650	PFDSM3638_03245	hypothetical protein
PFDSM3638_03250	645796	646563	PF_RS03310	663510	664277	PF0651	PFDSM3638_03250	hypothetical protein
PFDSM3638_03255	646971	648158	PF_RS03315	664685	665872	PF0652	PFDSM3638_03255	AAA family ATPase
PFDSM3638_03260	648311	648835	PF_RS03320	666025	666549	PF0653	PFDSM3638_03260	hypothetical protein
PFDSM3638_03265	649037	649414	PF_RS03325	666751	667128	PF0654	PFDSM3638_03265	hypothetical protein
PFDSM3638_03270	649648	650798	PF_RS03330	667119	668231	PF0655	PFDSM3638_03270	serine/threonine protein kinase
PFDSM3638_03270	649648	650798	PF_RS03335	668273	668512	PF0655.1n	PFDSM3638_03270	serine/threonine protein kinase
PFDSM3638_03275	650845	651243	PF_RS03340	668559	668957	PF0656	PFDSM3638_03275	hypothetical protein
PFDSM3638_03280	651283	652179	PF_RS03345	668997	669893	PF0657	PFDSM3638_03280	dihydrodipicolinate synthase family protein
PFDSM3638_03285	652192	652509	PF_RS10580	669906	670223	-	PFDSM3638_03285	DUF835 domain-containing protein
PFDSM3638_03290	652746	652970	PF_RS03350	670460	670684	-	PFDSM3638_03290	hypothetical protein
PFDSM3638_03295	652969	653163	PF_RS03355	670683	670877	-	PFDSM3638_03295	hypothetical protein
PFDSM3638_03300	653309	654265	PF_RS03360	671023	671979	PF0660	PFDSM3638_03300	[Fe-S]-binding protein
PFDSM3638_03305	654348	655130	PF_RS03365	672062	672844	PF0661	PFDSM3638_03305	TrmB family transcriptional regulator
PFDSM3638_03310	655223	655414	PF_RS03370	672937	673128	PF0662	PFDSM3638_03310	hypothetical protein
PFDSM3638_03315	655479	656441	PF_RS03375	673193	674155	PF0663	PFDSM3638_03315	hypothetical protein
PFDSM3638_03320	656472	656780	PF_RS03380	674186	674494	PF0664	PFDSM3638_03320	antibiotic biosynthesis monooxygenase
PFDSM3638_03325	656800	657150	PF_RS03385	674514	674864	PF0665	PFDSM3638_03325	hypothetical protein
PFDSM3638_03330	657265	658623	PF_RS03390	674979	676337	PF0666	PFDSM3638_03330	Fmu (Sun) domain-containing protein
PFDSM3638_03335	658870	660222	PF_RS03395	676584	677936	PF0667	PFDSM3638_03335	adenylosuccinate lyase
PFDSM3638_03340	660390	660770	PF_RS03400	678104	678484	PF0668	PFDSM3638_03340	deaminase
PFDSM3638_03345	660861	661793	PF_RS03405	678575	679507	PF0669	PFDSM3638_03345	GNAT family N-acetyltransferase
PFDSM3638_03350	662002	663774	PF_RS03410	679716	681488	PF0670	PFDSM3638_03350	ribosome biogenesis/translation initiation ATPase RLI
PFDSM3638_03355	663846	664049	PF_RS03415	681560	681763	PF0670.1n	PFDSM3638_03355	hypothetical protein
PFDSM3638_03360	664107	665675	PF_RS03420	681821	683389	PF0671	PFDSM3638_03360	methylmalonyl-CoA decarboxylase subunit alpha
PFDSM3638_03365	665686	666042	PF_RS03425	683400	683756	PF0672	PFDSM3638_03365	methylmalonyl-CoA epimerase
PFDSM3638_03370	666045	666479	PF_RS03430	683759	684193	PF0673	PFDSM3638_03370	acetyl-CoA carboxylase biotin carboxyl carrier protein subunit
PFDSM3638_03375	666486	667688	PF_RS03435	684200	685402	PF0674	PFDSM3638_03375	sodium ion-translocating decarboxylase subunit beta
PFDSM3638_03380	667745	667996	PF_RS03440	685459	685710	PF0675	PFDSM3638_03380	hypothetical protein
PFDSM3638_03385	667993	668937	PF_RS03445	685707	686651	PF0676	arcC	carbamate kinase
PFDSM3638_03390	669069	671231	PF_RS03450	686783	688945	PF0677	PFDSM3638_03390	ATP-dependent DNA helicase
PFDSM3638_03395	671241	672389	PF_RS03455	688955	690103	PF0678	PFDSM3638_03395	tRNA (guanine-N2)-dimethyltransferase
PFDSM3638_03400	672404	673075	PF_RS03460	690118	690789	PF0679	PFDSM3638_03400	M48 family peptidase
PFDSM3638_03405	673050	673463	PF_RS03465	690764	691177	PF0680	PFDSM3638_03405	hypothetical protein
PFDSM3638_03410	673670	674347	PF_RS03470	691384	692061	PF0681	PFDSM3638_03410	hypothetical protein
PFDSM3638_03415	674569	674985	PF_RS03475	692283	692699	PF0684	PFDSM3638_03415	hypothetical protein
PFDSM3638_03420	675403	676323	PF_RS03480	693117	694037	PF0685	PFDSM3638_03420	hypothetical protein
PFDSM3638_03425	676335	676754	PF_RS03485	694049	694468	PF0686	PFDSM3638_03425	hypothetical protein
PFDSM3638_03430	676761	677612	PF_RS03490	694475	695326	PF0687	PFDSM3638_03430	transcription initiation factor IIB
PFDSM3638_03435	681365	681865	PF_RS10585	699079	699579	PF0688	PFDSM3638_03435	serine protease
PFDSM3638_03440	681936	682307	PF_RS03500	699650	700021	PF0689	PFDSM3638_03440	hypothetical protein
PFDSM3638_03445	682437	682823	PF_RS03505	700151	700537	PF0691	PFDSM3638_03445	transcriptional regulator
PFDSM3638_03450	682997	684367	PF_RS03510	700711	702081	PF0692	hcp	hydroxylamine reductase
PFDSM3638_03455	684392	684868	PF_RS03515	702106	702582	PF0693	PFDSM3638_03455	hypothetical protein
PFDSM3638_03460	684979	686154	PF_RS03520	702693	703868	PF0694	PFDSM3638_03460	MBL fold hydrolase
PFDSM3638_03465	686156	687496	PF_RS03525	703870	705210	PF0695	PFDSM3638_03465	DUF438 domain-containing protein
PFDSM3638_03470	687498	687809	PF_RS03530	705212	705523	PF0696	PFDSM3638_03470	cupin domain-containing protein
PFDSM3638_03475	687888	688208	PF_RS03535	705602	705922	PF0697	PFDSM3638_03475	MFS transporter
PFDSM3638_03480	688223	688819	PF_RS03540	705937	706533	PF0698	PFDSM3638_03480	MFS transporter
PFDSM3638_03485	689505	690026	PF_RS03545	707219	707740	PF0702	PFDSM3638_03485	aminopeptidase P family protein
PFDSM3638_03490	690041	690856	PF_RS03550	707755	708570	PF0703	PFDSM3638_03490	hypothetical protein
PFDSM3638_03495	690928	691281	PF_RS03555	708642	708995	PF0704	PFDSM3638_03495	DUF302 domain-containing protein
PFDSM3638_03500	691295	692596	PF_RS03560	709009	710310	PF0705	PFDSM3638_03500	cytochrome C biogenesis protein
PFDSM3638_03505	692658	692987	PF_RS03565	710372	710701	PF0706	PFDSM3638_03505	hypothetical protein
PFDSM3638_03510	692990	693196	PF_RS03570	710704	710910	PF0706.1n	PFDSM3638_03510	hypothetical protein
PFDSM3638_03515	693360	693545	PF_RS10590	711074	711259	-	PFDSM3638_03515	4-oxalocrotonate tautomerase
PFDSM3638_03520	693561	694946	PF_RS03575	711275	712660	PF0708	PFDSM3638_03520	MATE family efflux transporter
PFDSM3638_03525	694986	695303	PF_RS10595	712700	713019	-	PFDSM3638_03525	transcriptional regulator
PFDSM3638_03530	695521	696525	PF_RS03590	713237	714241	-	PFDSM3638_03530	anion transporter
PFDSM3638_03535	696577	697101	PF_RS03595	714350	714814	PF0714	PFDSM3638_03535	flavodoxin
PFDSM3638_03540	697364	697900	PF_RS03600	715081	715617	PF0715	PFDSM3638_03540	NAD(P)H nitroreductase
PFDSM3638_03545	697962	698798	PF_RS03605	715679	716515	PF0716	PFDSM3638_03545	NAD(P)-dependent oxidoreductase
PFDSM3638_03550	699186	699710	PF_RS03610	716903	717427	PF0717	PFDSM3638_03550	class I SAM-dependent methyltransferase
PFDSM3638_03555	700083	700230	PF_RS10600	717656	717947	-	PFDSM3638_03555	oxidoreductase
PFDSM3638_03560	700286	701029	PF_RS03615	718003	718746	PF0718	PFDSM3638_03560	hypothetical protein
PFDSM3638_03565	701065	701289	PF_RS03620	718782	719006	PF0719	PFDSM3638_03565	nuclear transport factor 2 family protein
PFDSM3638_03570	701286	701729	PF_RS10605	719003	719446	PF0720	PFDSM3638_03570	hypothetical protein
PFDSM3638_03575	701803	701969	-	-	-	-	PFDSM3638_03575	hypothetical protein
PFDSM3638_03580	701991	702557	PF_RS03630	719708	720274	PF0721	PFDSM3638_03580	NADPH-dependent oxidoreductase
PFDSM3638_03585	702699	703268	PF_RS03635	720416	720985	PF0722	PFDSM3638_03585	peroxiredoxin
PFDSM3638_03590	703603	704439	PF_RS03640	721320	722156	PF0723	PFDSM3638_03590	ferrous iron transporter
PFDSM3638_03595	704538	705122	PF_RS03645	722255	722839	PF0724	PFDSM3638_03595	thioredoxin
PFDSM3638_03600	705158	705550	PF_RS03650	722875	723267	PF0725	PFDSM3638_03600	CoA-binding protein
PFDSM3638_03605	705554	705928	PF_RS03655	723271	723645	PF0726	PFDSM3638_03605	DUF302 domain-containing protein
PFDSM3638_03610	706022	706240	PF_RS03660	723739	723957	PF0727	PFDSM3638_03610	copper chaperone
PFDSM3638_03615	706357	706998	PF_RS03665	724074	724715	PF0728	PFDSM3638_03615	class I SAM-dependent methyltransferase
PFDSM3638_03620	707002	708168	PF_RS03670	724719	725885	PF0729	PFDSM3638_03620	copper oxidase
PFDSM3638_03625	708226	709140	PF_RS03675	725943	726857	PF0730	PFDSM3638_03625	hypothetical protein
PFDSM3638_03630	709208	709405	PF_RS03680	726919	727122	PF0731	PFDSM3638_03630	heavy metal translocating P-type ATPase
PFDSM3638_03635	709490	710239	PF_RS03685	727207	727956	PF0732	PFDSM3638_03635	ABC transporter ATP-binding protein
PFDSM3638_03640	710265	710837	PF_RS03690	728151	728354	-	PFDSM3638_03640	hypothetical protein
PFDSM3638_03645	710978	711886	PF_RS03695	728694	729602	PF0733	PFDSM3638_03645	ABC transporter ATP-binding protein
PFDSM3638_03650	711883	712998	PF_RS03700	729599	730714	PF0734	PFDSM3638_03650	hypothetical protein
PFDSM3638_03655	713002	713718	PF_RS03705	730718	731434	PF0735	PFDSM3638_03655	hypothetical protein
PFDSM3638_03660	714090	714650	PF_RS03710	731806	732366	PF0736	PFDSM3638_03660	hypothetical protein
PFDSM3638_03665	714661	714846	PF_RS03715	732377	732562	-	PFDSM3638_03665	hypothetical protein
PFDSM3638_03670	715493	715627	PF_RS10610	733209	733343	PF0737	PFDSM3638_03670	hypothetical protein
PFDSM3638_03675	715646	716251	PF_RS03720	733362	733967	PF0738	PFDSM3638_03675	methyltransferase type 11
PFDSM3638_03680	716407	716766	PF_RS03725	734123	734482	PF0738.1n	PFDSM3638_03680	hypothetical protein
PFDSM3638_03685	716882	717623	PF_RS10615	734598	735339	-	PFDSM3638_03685	cytochrome C biogenesis protein
PFDSM3638_03690	717564	718184	PF_RS03735	735280	735900	PF0739	PFDSM3638_03690	AsnC family transcriptional regulator
PFDSM3638_03695	718309	720708	PF_RS03740	736025	738424	PF0740	PFDSM3638_03695	copper-translocating P-type ATPase
PFDSM3638_03700	720724	721026	PF_RS03745	738440	738742	PF0741	PFDSM3638_03700	thioredoxin
PFDSM3638_03705	721127	721651	PF_RS03750	738843	739367	PF0742	PFDSM3638_03705	ferritin
PFDSM3638_03710	721928	722170	PF_RS03755	739644	739886	PF0743	PFDSM3638_03710	hypothetical protein
PFDSM3638_03715	722400	723989	PF_RS03760	740116	741705	PF0744	PFDSM3638_03715	ABC transporter ATP-binding protein
PFDSM3638_03720	724677	725312	PF_RS03765	742393	743028	PF0745	PFDSM3638_03720	hypothetical protein
PFDSM3638_03725	725375	726184	PF_RS03770	743091	743900	PF0746	PFDSM3638_03725	ZIP family metal transporter
PFDSM3638_03730	726176	727252	PF_RS03775	743892	744968	PF0747	PFDSM3638_03730	aminopeptidase P family protein
PFDSM3638_03735	728023	728610	PF_RS03785	745739	746326	PF0750	PFDSM3638_03735	nitroreductase
PFDSM3638_03740	728580	729824	PF_RS03790	746296	747540	PF0751	PFDSM3638_03740	FprA family A-type flavoprotein
PFDSM3638_03745	729873	730322	PF_RS03795	747589	748038	PF0752	PFDSM3638_03745	peroxiredoxin
PFDSM3638_03750	730327	731193	PF_RS03800	748043	748909	PF0753	PFDSM3638_03750	2-oxoacid ferredoxin oxidoreductase
PFDSM3638_03755	731190	732902	PF_RS03805	748906	750618	PF0754	PFDSM3638_03755	2-oxoacid:acceptor oxidoreductase subunit alpha
PFDSM3638_03760	732953	734473	PF_RS03810	750669	752189	PF0755	PFDSM3638_03760	NADP-dependent glyceraldehyde-3-phosphate dehydrogenase
PFDSM3638_03765	734627	735328	PF_RS03815	752343	753044	PF0756	PFDSM3638_03765	IS6 family transposase ISPfu2
PFDSM3638_03770	735301	735674	PF_RS03820	753017	753390	PF0758	PFDSM3638_03770	DNA-binding protein
PFDSM3638_03775	735917	736234	PF_RS03825	753633	753950	PF0759	PFDSM3638_03775	hypothetical protein
PFDSM3638_03780	736195	737217	PF_RS03830	753911	754933	PF0760	PFDSM3638_03780	transposase
PFDSM3638_03785	737254	737406	-	-	-	-	PFDSM3638_03785	AAA family ATPase
PFDSM3638_03790	737344	738107	PF_RS10620	755060	755823	-	PFDSM3638_03790	hypothetical protein
PFDSM3638_03795	738317	739611	PF_RS03840	756033	757328	PF0764	PFDSM3638_03795	ATPase
PFDSM3638_03800	739671	741017	PF_RS03845	757388	758734	PF0765	PFDSM3638_03800	nucleotide sugar dehydrogenase
PFDSM3638_03805	741018	741968	PF_RS03850	758735	759685	PF0766	PFDSM3638_03805	gfo/Idh/MocA family oxidoreductase
PFDSM3638_03810	741974	743068	PF_RS03855	759691	760785	PF0767	PFDSM3638_03810	DegT/DnrJ/EryC1/StrS family aminotransferase
PFDSM3638_03815	743078	743694	PF_RS03860	760795	761409	PF0768	PFDSM3638_03815	N-acetyltransferase
PFDSM3638_03820	743764	744660	PF_RS03865	761479	762375	PF0769	PFDSM3638_03820	glycosyl transferase
PFDSM3638_03825	744653	745531	PF_RS03870	762368	763246	PF0770	galU	UTP--glucose-1-phosphate uridylyltransferase
PFDSM3638_03830	745528	746799	PF_RS03875	763243	764514	PF0771	PFDSM3638_03830	UDP-glucose/GDP-mannose dehydrogenase family protein
PFDSM3638_03835	746823	747221	PF_RS03880	764538	764936	PF0772	PFDSM3638_03835	nucleotidyltransferase domain-containing protein
PFDSM3638_03840	747474	747710	PF_RS03885	765189	765425	PF0774	PFDSM3638_03840	antitoxin
PFDSM3638_03845	747915	748145	PF_RS03890	765630	765860	-	PFDSM3638_03845	hypothetical protein
PFDSM3638_03850	748218	748544	PF_RS03895	765933	766259	PF0776	PFDSM3638_03850	PIN domain-containing protein
PFDSM3638_03855	748570	749288	PF_RS10625	766285	766518	-	PFDSM3638_03855	hypothetical protein
PFDSM3638_03860	749241	749459	PF_RS03900	766956	767174	PF0776.1n	PFDSM3638_03860	hypothetical protein
PFDSM3638_03865	749466	749645	PF_RS03905	767181	767360	PF0778	PFDSM3638_03865	hypothetical protein
PFDSM3638_03870	749642	749776	PF_RS10630	767357	767491	PF0779	PFDSM3638_03870	DUF104 domain-containing protein
PFDSM3638_03875	749853	750554	PF_RS03910	767568	768269	PF0780	PFDSM3638_03875	IS6 family transposase ISPfu2
PFDSM3638_03880	750564	750734	-	-	-	-	PFDSM3638_03880	AbrB family transcriptional regulator
PFDSM3638_03885	750731	751147	PF_RS03915	768446	768862	PF0781	PFDSM3638_03885	PIN domain-containing protein
PFDSM3638_03890	751480	751809	PF_RS03920	769195	769524	PF0782	PFDSM3638_03890	hypothetical protein
PFDSM3638_03895	751836	753053	PF_RS03925	769551	770768	PF0783	PFDSM3638_03895	hypothetical protein
PFDSM3638_03900	753021	753611	PF_RS03930	770736	771326	PF0784	PFDSM3638_03900	hypothetical protein
PFDSM3638_03905	753677	754378	PF_RS03935	771392	772093	PF0785	PFDSM3638_03905	IS6 family transposase ISPfu5
PFDSM3638_03910	754370	754948	PF_RS03940	772203	772664	PF0785.2n	PFDSM3638_03910	hypothetical protein
PFDSM3638_03915	755073	755944	PF_RS10635	772789	773660	PF0786	PFDSM3638_03915	IS982 family transposase
PFDSM3638_03920	755925	756314	PF_RS03955	773641	774030	PF0787	PFDSM3638_03920	hypothetical protein
PFDSM3638_03925	756311	756970	PF_RS03960	774027	774686	PF0788	PFDSM3638_03925	glycosyltransferase family 1 protein
PFDSM3638_03930	756975	757445	PF_RS03965	774691	775161	PF0789	PFDSM3638_03930	hypothetical protein
PFDSM3638_03935	757458	759218	PF_RS03970	775174	776934	PF0790	PFDSM3638_03935	hypothetical protein
PFDSM3638_03940	759164	760333	PF_RS03975	776880	778049	PF0791	PFDSM3638_03940	glycosyltransferase family 4 protein
PFDSM3638_03945	760334	761944	PF_RS03980	778050	779660	PF0792	PFDSM3638_03945	asparagine synthase
PFDSM3638_03950	761946	762209	PF_RS03985	779679	779996	PF0793	PFDSM3638_03950	hypothetical protein
PFDSM3638_03955	762271	763347	PF_RS03990	779986	781062	PF0794	PFDSM3638_03955	UDP-N-acetylglucosamine 2-epimerase (non-hydrolyzing)
PFDSM3638_03960	763344	764546	PF_RS03995	781059	782261	PF0795	PFDSM3638_03960	capsular biosynthesis protein
PFDSM3638_03965	764559	765059	PF_RS04000	782274	782774	PF0796	PFDSM3638_03965	galactoside O-acetyltransferase
PFDSM3638_03970	765068	766111	PF_RS04005	782783	783826	PF0797	PFDSM3638_03970	GNAT family N-acetyltransferase
PFDSM3638_03975	766124	767032	PF_RS04010	783839	784747	PF0798	PFDSM3638_03975	glycosyltransferase family 2 protein
PFDSM3638_03980	767044	767244	PF_RS04015	784759	784959	PF0799	PFDSM3638_03980	hypothetical protein
PFDSM3638_03985	767425	768291	PF_RS10640	785140	786006	PF0800	PFDSM3638_03985	IS982 family transposase
PFDSM3638_03990	768312	768716	PF_RS04030	786027	786431	PF0802	PFDSM3638_03990	hypothetical protein
PFDSM3638_03995	768713	769957	PF_RS04035	786428	787672	PF0803	PFDSM3638_03995	DUF58 domain-containing protein
PFDSM3638_04000	769954	770883	PF_RS04040	787669	788598	PF0804	PFDSM3638_04000	MoxR family ATPase
PFDSM3638_04005	770885	771870	PF_RS04045	788600	789585	PF0806	PFDSM3638_04005	hypothetical protein
PFDSM3638_04010	771867	773555	PF_RS04050	789582	791270	PF0807	PFDSM3638_04010	hypothetical protein
PFDSM3638_04015	773611	774369	PF_RS04055	791326	792084	PF0808	PFDSM3638_04015	hypothetical protein
PFDSM3638_04020	774360	774602	PF_RS04060	792075	792317	PF0809	PFDSM3638_04020	hypothetical protein
PFDSM3638_04025	774720	775709	PF_RS04065	792435	793424	PF0810	PFDSM3638_04025	DUF1616 domain-containing protein
PFDSM3638_04030	775765	776205	PF_RS04070	793480	793920	PF0811	PFDSM3638_04030	hypothetical protein
PFDSM3638_04035	776391	776807	PF_RS04075	794106	794522	PF0812	PFDSM3638_04035	PIN domain-containing protein
PFDSM3638_04040	776804	777034	PF_RS04080	794519	794749	PF0813	PFDSM3638_04040	AbrB family transcriptional regulator
PFDSM3638_04045	777259	777747	PF_RS04085	794974	795462	PF0814	PFDSM3638_04045	hypothetical protein
PFDSM3638_04050	777701	778092	PF_RS10645	795416	795649	-	PFDSM3638_04050	hypothetical protein
PFDSM3638_04055	778491	779303	PF_RS04090	796206	797018	PF0816	PFDSM3638_04055	mechanosensitive ion channel family protein
PFDSM3638_04060	779422	780123	PF_RS04095	797137	797838	PF0817	PFDSM3638_04060	IS6 family transposase ISPfu2
PFDSM3638_04075	780426	781433	PF_RS04110	798141	799148	PF0818	PFDSM3638_04075	histone deacetylase family protein
PFDSM3638_04080	781486	781737	PF_RS04115	799201	799452	PF0819	PFDSM3638_04080	50S ribosomal protein L14e
PFDSM3638_04085	781738	782316	PF_RS04120	799453	800031	PF0820	PFDSM3638_04085	cytidylate kinase
PFDSM3638_04090	782328	782597	PF_RS04125	800043	800312	PF0821	PFDSM3638_04090	50S ribosomal protein L34e
PFDSM3638_04095	782676	782921	PF_RS04130	800391	800636	PF0822	PFDSM3638_04095	hypothetical protein
PFDSM3638_04100	782979	784394	PF_RS04135	800694	802109	PF0823	PFDSM3638_04100	MATE family efflux transporter
PFDSM3638_04105	784405	785844	PF_RS04140	802120	803559	PF0824	PFDSM3638_04105	MATE family efflux transporter
PFDSM3638_04110	785828	787678	PF_RS04145	803543	805393	PF0825	PFDSM3638_04110	S9 family peptidase
PFDSM3638_04115	787711	788817	PF_RS04150	805426	806532	PF0826	PFDSM3638_04115	MFS transporter
PFDSM3638_04120	788841	790070	PF_RS04155	806556	807785	PF0827	PFDSM3638_04120	23S rRNA (uracil(1939)-C(5))-methyltransferase RlmD
PFDSM3638_04125	790067	790756	PF_RS04160	807782	808471	PF0828	PFDSM3638_04125	TIGR00289 family protein
PFDSM3638_04130	790805	790999	PF_RS04165	808520	808714	PF0829	PFDSM3638_04130	hypothetical protein
PFDSM3638_04135	791035	791421	PF_RS04170	808750	809136	PF0830	PFDSM3638_04135	hypothetical protein
PFDSM3638_04140	791418	792194	PF_RS04175	809133	809909	PF0831	PFDSM3638_04140	DUF1624 domain-containing protein
PFDSM3638_04145	792653	792910	PF_RS04180	810368	810625	PF0833	PFDSM3638_04145	hypothetical protein
PFDSM3638_04150	792969	793667	PF_RS04185	810684	811382	PF0834	PFDSM3638_04150	multidrug transporter
PFDSM3638_04155	793664	794545	PF_RS04190	811379	812260	PF0835	PFDSM3638_04155	ABC transporter ATP-binding protein
PFDSM3638_04160	794890	795586	PF_RS04195	812605	813301	PF0836	PFDSM3638_04160	adenosylcobinamide-GDP ribazoletransferase
PFDSM3638_04165	795640	795834	PF_RS04200	813355	813549	PF0838	PFDSM3638_04165	DUF2281 domain-containing protein
PFDSM3638_04170	795834	796214	PF_RS04205	813549	813929	PF0839	PFDSM3638_04170	PIN domain-containing protein
PFDSM3638_04175	796316	796549	PF_RS04210	814031	814264	PF0840	PFDSM3638_04175	nucleotidyltransferase
PFDSM3638_04180	796555	796782	PF_RS04215	814270	814497	PF0841	PFDSM3638_04180	hypothetical protein
PFDSM3638_04185	796839	797105	PF_RS10485	814554	814820	-	PFDSM3638_04185	hypothetical protein
PFDSM3638_04190	797105	797434	PF_RS10490	814820	815149	PF0842	PFDSM3638_04190	hypothetical protein
PFDSM3638_04195	797476	797790	PF_RS04225	815191	815505	PF0842.1n	PFDSM3638_04195	DUF4268 domain-containing protein
PFDSM3638_04200	798006	798803	PF_RS04230	815721	816518	PF0843	PFDSM3638_04200	radical SAM protein
PFDSM3638_04205	798804	799607	PF_RS04235	816519	817322	PF0844	PFDSM3638_04205	hypothetical protein
PFDSM3638_04210	799585	801423	PF_RS04240	817300	819183	PF0845	iorA	indolepyruvate ferredoxin oxidoreductase subunit alpha
PFDSM3638_04215	801392	802903	PF_RS04245	819107	820618	PF0846	PFDSM3638_04215	amidohydrolase
PFDSM3638_04220	802874	803620	PF_RS04250	820589	821335	PF0847	PFDSM3638_04220	SAM-dependent methyltransferase
PFDSM3638_04225	803671	804441	PF_RS04255	821386	822156	PF0848	PFDSM3638_04225	hypothetical protein
PFDSM3638_04230	804712	805788	PF_RS04260	822427	823503	PF0849	PFDSM3638_04230	DUF512 domain-containing protein
PFDSM3638_04235	805844	806926	PF_RS04265	823559	824641	PF0850	PFDSM3638_04235	radical SAM protein
PFDSM3638_04240	806969	807406	PF_RS04270	824684	825121	PF0851	PFDSM3638_04240	metal-dependent transcriptional regulator
PFDSM3638_04245	807388	808716	PF_RS04275	825103	826431	PF0852	PFDSM3638_04245	NCS2 family permease
PFDSM3638_04250	808862	809659	PF_RS04280	826577	827374	PF0853	mtnP	S-methyl-5'-thioadenosine phosphorylase
PFDSM3638_04260	809946	810905	PF_RS04290	827661	828620	PF0854	PFDSM3638_04260	1,4-beta-glucanase
PFDSM3638_04265	810902	811792	PF_RS04295	828617	829507	PF0855	PFDSM3638_04265	hypothetical protein
PFDSM3638_04275	812643	813767	PF_RS04305	830358	831542	PF0856	fni	type 2 isopentenyl-diphosphate Delta-isomerase
PFDSM3638_04280	813757	813996	PF_RS04310	831471	831710	PF0855.1n	PFDSM3638_04280	DNA-binding protein
PFDSM3638_04285	813989	815980	PF_RS04315	831703	833694	PF0857	feoB	ferrous iron transport protein B
PFDSM3638_04290	815983	816192	PF_RS04320	833697	833906	PF0858	PFDSM3638_04290	ferrous iron transport protein A
PFDSM3638_04295	816316	817074	PF_RS04325	834030	834788	PF0859	PFDSM3638_04295	deoxyribonuclease
PFDSM3638_04300	817129	817917	PF_RS04330	834843	835631	PF0860	PFDSM3638_04300	hypothetical protein
PFDSM3638_04305	817920	819278	PF_RS04335	835634	836992	PF0861	PFDSM3638_04305	phosphoglucosamine mutase
PFDSM3638_04310	819298	819495	PF_RS04340	837012	837209	PF0861.1n	PFDSM3638_04310	hypothetical protein
PFDSM3638_04315	819527	819835	PF_RS04345	837241	837549	-	PFDSM3638_04315	hypothetical protein
PFDSM3638_04320	819896	821023	PF_RS04350	837611	838738	PF0862	PFDSM3638_04320	tyrosine--tRNA ligase
PFDSM3638_04325	820995	821510	PF_RS04355	838710	839225	PF0863	PFDSM3638_04325	CYTH domain-containing protein
PFDSM3638_04330	821517	822005	PF_RS04360	839232	839720	PF0864	PFDSM3638_04330	transcriptional regulator
PFDSM3638_04335	822009	822542	PF_RS04365	839724	840257	PF0865	PFDSM3638_04335	aromatic acid decarboxylase
PFDSM3638_04340	822652	823461	PF_RS04370	840367	841176	PF0866	PFDSM3638_04340	hypothetical protein
PFDSM3638_04345	823458	823769	PF_RS04375	841173	841484	PF0867	PFDSM3638_04345	hypothetical protein
PFDSM3638_04350	823905	825146	PF_RS04380	841620	842861	PF0868	PFDSM3638_04350	NDP-sugar synthase
PFDSM3638_04355	825207	826523	PF_RS04385	842922	844238	PF0869	PFDSM3638_04355	aspartate--tRNA(Asn) ligase
PFDSM3638_04360	826524	828317	PF_RS04390	844239	846032	PF0870	PFDSM3638_04360	glycoside hydrolase
PFDSM3638_04365	828317	828724	PF_RS04395	846032	846439	PF0871	PFDSM3638_04365	hypothetical protein
PFDSM3638_04370	828726	829436	PF_RS04400	846441	847151	-	PFDSM3638_04370	recombinase
PFDSM3638_04375	829504	830442	PF_RS04405	847219	848157	PF0874	PFDSM3638_04375	membrane dipeptidase
PFDSM3638_04380	830439	831302	PF_RS04410	848154	849017	PF0875	PFDSM3638_04380	SAM-dependent methyltransferase
PFDSM3638_04385	831280	831864	PF_RS04415	848995	849579	PF0876	PFDSM3638_04385	50S ribosomal protein L15e
PFDSM3638_04390	832018	832691	PF_RS10650	849745	850453	-	PFDSM3638_04390	hypothetical protein
PFDSM3638_04395	832862	834265	PF_RS04425	850576	851979	PF0880	PFDSM3638_04395	ATP-binding protein
PFDSM3638_04400	834459	835166	PF_RS04430	852173	852880	PF0881	PFDSM3638_04400	ABC transporter ATP-binding protein
PFDSM3638_04405	835153	835617	PF_RS04435	852867	853331	PF0882	PFDSM3638_04405	hypothetical protein
PFDSM3638_04410	835614	836369	PF_RS04440	853328	854083	PF0883	PFDSM3638_04410	ABC transporter permease
PFDSM3638_04415	836366	837409	PF_RS04445	854080	855123	PF0884	PFDSM3638_04415	hypothetical protein
PFDSM3638_04420	837503	837850	PF_RS04450	855217	855564	-	PFDSM3638_04420	hypothetical protein
PFDSM3638_04425	838126	838670	PF_RS10655	855834	856378	-	PFDSM3638_04425	X-Pro aminopeptidase
PFDSM3638_04430	838882	839787	PF_RS04460	856590	857495	PF0886	PFDSM3638_04430	DUF4855 domain-containing protein
PFDSM3638_04435	839772	840695	PF_RS04465	857480	858403	PF0887	PFDSM3638_04435	hypothetical protein
PFDSM3638_04440	840821	841684	PF_RS04470	858529	859392	PF0888	PFDSM3638_04440	hypothetical protein
PFDSM3638_04445	841698	842675	PF_RS04475	859406	860383	PF0889	PFDSM3638_04445	hypothetical protein
PFDSM3638_04450	842911	845814	PF_RS04480	860619	863522	PF0890	leuS	leucine--tRNA ligase
PFDSM3638_04455	846046	847149	PF_RS04485	863754	864857	PF0891	PFDSM3638_04455	hydrogenase
PFDSM3638_04460	847146	848024	PF_RS04490	864854	865732	PF0892	PFDSM3638_04460	cytochrome-c3 hydrogenase subunit gamma
PFDSM3638_04465	848035	848820	PF_RS04495	865743	866528	PF0893	PFDSM3638_04465	sulfhydrogenase 1 subunit delta
PFDSM3638_04470	848817	850103	PF_RS04500	866525	867811	PF0894	PFDSM3638_04470	sulfhydrogenase 1 subunit alpha
PFDSM3638_04475	850100	850720	PF_RS04505	867808	868428	PF0895	PFDSM3638_04475	ABC transporter ATP-binding protein
PFDSM3638_04480	850717	851145	PF_RS04510	868425	868853	PF0896	PFDSM3638_04480	hypothetical protein
PFDSM3638_04485	851138	852280	PF_RS04515	868846	869988	PF0897	PFDSM3638_04485	hypothetical protein
PFDSM3638_04490	852286	852549	PF_RS04520	869994	870257	PF0897.1n	PFDSM3638_04490	hypothetical protein
PFDSM3638_04495	852939	853640	PF_RS04525	870647	871348	PF0898	PFDSM3638_04495	IS6 family transposase ISPfu5
PFDSM3638_04500	853760	854047	PF_RS04530	871468	871755	PF0899	PFDSM3638_04500	DUF1884 domain-containing protein
PFDSM3638_04505	854402	855382	PF_RS04535	872110	873090	PF0900	PFDSM3638_04505	HNH endonuclease
PFDSM3638_04510	855819	856259	PF_RS04540	873517	873930	PF0901	PFDSM3638_04510	hypothetical protein
PFDSM3638_04515	856486	857481	PF_RS04545	874193	875188	PF0902	PFDSM3638_04515	hypothetical protein
PFDSM3638_04525	857846	858814	PF_RS04555	875553	876521	PF0903	PFDSM3638_04525	GHMP kinase
PFDSM3638_04530	858824	859552	PF_RS04560	876531	877259	PF0904	PFDSM3638_04530	N-glycosylase
PFDSM3638_04535	859811	860572	PF_RS04565	877518	878279	PF0905	PFDSM3638_04535	ABC transporter ATP-binding protein
PFDSM3638_04540	860572	862035	PF_RS04570	878279	879742	PF0906	PFDSM3638_04540	hypothetical protein
PFDSM3638_04545	862047	862373	PF_RS04575	879754	880080	PF0907	PFDSM3638_04545	translation factor
PFDSM3638_04550	862383	863222	PF_RS04580	880090	880929	PF0908	PFDSM3638_04550	metal-dependent hydrolase
PFDSM3638_04555	863219	863965	PF_RS04585	880926	881672	PF0909	PFDSM3638_04555	ABC transporter ATP-binding protein
PFDSM3638_04560	863962	864993	PF_RS04590	881669	882700	PF0910	PFDSM3638_04560	iron ABC transporter permease
PFDSM3638_04565	865025	866110	PF_RS04595	882732	883817	PF0911	PFDSM3638_04565	iron ABC transporter substrate-binding protein
PFDSM3638_04570	866107	866794	PF_RS10660	883814	884501	-	PFDSM3638_04570	formylmethanofuran dehydrogenase
PFDSM3638_04575	866916	867629	PF_RS04605	884623	885336	PF0915	PFDSM3638_04575	cytochrome c biogenesis protein CcdA
PFDSM3638_04580	867687	868076	PF_RS04610	885394	885783	PF0916	PFDSM3638_04580	hypothetical protein
PFDSM3638_04585	868086	868589	PF_RS04615	885793	886296	PF0917	PFDSM3638_04585	hypothetical protein
PFDSM3638_04590	868638	869438	PF_RS04620	886345	887145	PF0918	PFDSM3638_04590	tRNA pseudouridine(38-40) synthase TruA
PFDSM3638_04595	869469	869675	PF_RS10665	887176	887382	PF0919	PFDSM3638_04595	hypothetical protein
PFDSM3638_04600	869684	870266	PF_RS04625	887391	887973	PF0920	PFDSM3638_04600	nucleotidyltransferase
PFDSM3638_04605	870301	871218	PF_RS04630	888008	888924	PF0921	PFDSM3638_04605	ABC transporter ATP-binding protein
PFDSM3638_04610	871230	872036	PF_RS04635	888936	889742	PF0922	PFDSM3638_04610	hypothetical protein
PFDSM3638_04615	872023	872505	PF_RS04640	889729	890211	PF0923	PFDSM3638_04615	hypothetical protein
PFDSM3638_04620	872502	872930	PF_RS04645	890208	890636	PF0924	PFDSM3638_04620	hypothetical protein
PFDSM3638_04625	872927	873778	PF_RS04650	890633	891484	PF0925	PFDSM3638_04625	radical SAM protein
PFDSM3638_04630	873705	874085	PF_RS10670	891411	891617	-	PFDSM3638_04630	hypothetical protein
PFDSM3638_04635	874091	874318	PF_RS04655	891798	892025	PF0926	PFDSM3638_04635	hypothetical protein
PFDSM3638_04640	874725	875147	PF_RS04660	892432	892854	PF0927	PFDSM3638_04640	nucleotide-binding protein
PFDSM3638_04645	875238	875416	PF_RS10675	892897	893096	-	PFDSM3638_04645	IS607 family transposase
PFDSM3638_04650	875471	875629	PF_RS10680	893178	893336	PF0928	PFDSM3638_04650	hypothetical protein
PFDSM3638_04655	875683	876153	PF_RS04665	893390	893860	PF0929	PFDSM3638_04655	hypothetical protein
PFDSM3638_04660	876253	876948	PF_RS04670	893960	894655	PF0930	PFDSM3638_04660	6-hydroxymethyl-7,8-dihydropterin pyrophosphokinase
PFDSM3638_04665	876938	877423	PF_RS04675	894645	895130	PF0931	PFDSM3638_04665	nucleoside-diphosphate kinase
PFDSM3638_04670	877410	877664	PF_RS04680	895117	895371	PF0932	PFDSM3638_04670	hypothetical protein
PFDSM3638_04675	877639	879582	PF_RS04685	895346	897290	PF0933	PFDSM3638_04675	DNA repair helicase
PFDSM3638_04680	879922	880308	PF_RS04690	897630	898016	PF0934	PFDSM3638_04680	hypothetical protein
PFDSM3638_04685	880617	882311	PF_RS04695	898325	900019	PF0935	ilvB	acetolactate synthase, large subunit, biosynthetic type
PFDSM3638_04690	882322	883311	PF_RS04700	900030	901019	PF0936	PFDSM3638_04690	ketol-acid reductoisomerase
PFDSM3638_04695	883346	884845	PF_RS04705	901054	902553	PF0937	PFDSM3638_04695	2-isopropylmalate synthase
PFDSM3638_04700	884850	886124	PF_RS04710	902558	903832	PF0938	leuC	3-isopropylmalate dehydratase large subunit
PFDSM3638_04705	886121	886615	PF_RS04715	903829	904323	PF0939	leuD	3-isopropylmalate dehydratase small subunit
PFDSM3638_04710	886612	887679	PF_RS04720	904320	905387	PF0940	PFDSM3638_04710	3-isopropylmalate dehydrogenase
PFDSM3638_04715	887660	889237	PF_RS04725	905368	906945	PF0941	PFDSM3638_04715	citramalate synthase
PFDSM3638_04720	889234	890889	PF_RS04730	906942	908597	PF0942	ilvD	dihydroxy-acid dehydratase
PFDSM3638_04725	891051	891386	PF_RS04735	908759	909094	PF0943	PFDSM3638_04725	HEPN domain-containing protein
PFDSM3638_04730	891349	891717	PF_RS04740	909057	909425	PF0944	PFDSM3638_04730	nucleotidyltransferase
PFDSM3638_04735	891718	892107	PF_RS04745	909426	909815	PF0945	PFDSM3638_04735	hypothetical protein
PFDSM3638_04740	892230	892931	PF_RS04750	909938	910639	PF0946	PFDSM3638_04740	IS6 family transposase ISPfu1
PFDSM3638_04745	892891	893664	PF_RS04755	910599	911372	PF0947	PFDSM3638_04745	MFS transporter
PFDSM3638_04750	894319	895050	PF_RS04760	912027	912758	PF0948	PFDSM3638_04750	hypothetical protein
PFDSM3638_04755	895063	895419	PF_RS04765	912771	913127	PF0949	PFDSM3638_04755	hypothetical protein
PFDSM3638_04760	895828	896157	PF_RS04770	913536	913865	PF0951	PFDSM3638_04760	hypothetical protein
PFDSM3638_04765	896228	897295	PF_RS04775	913936	915003	PF0952	PFDSM3638_04765	CGP-CTERM sorting domain-containing protein
PFDSM3638_04770	897251	898120	PF_RS04780	914959	915828	PF0953	PFDSM3638_04770	N-acetyltransferase
PFDSM3638_04775	898225	898674	PF_RS04785	915933	916382	PF0954	PFDSM3638_04775	hypothetical protein
PFDSM3638_04780	898690	899628	PF_RS04790	916398	917336	PF0955	PFDSM3638_04780	hypothetical protein
PFDSM3638_04785	899832	900695	PF_RS04795	917540	918403	PF0956	PFDSM3638_04785	hypothetical protein
PFDSM3638_04790	900845	901030	PF_RS10685	918553	918738	PF0957	PFDSM3638_04790	hypothetical protein
PFDSM3638_04795	901195	901569	PF_RS04800	918903	919277	PF0958	PFDSM3638_04795	DUF4143 domain-containing protein
PFDSM3638_04800	902028	902255	PF_RS04805	919736	919963	PF0958.3n	PFDSM3638_04800	hypothetical protein
PFDSM3638_04805	902294	902476	-	-	-	-	PFDSM3638_04805	hypothetical protein
PFDSM3638_04810	902473	902658	PF_RS04810	920180	920365	PF0959	PFDSM3638_04810	hypothetical protein
PFDSM3638_04815	902694	903059	PF_RS04815	920401	920739	PF0960	PFDSM3638_04815	hypothetical protein
PFDSM3638_04830	903354	903572	PF_RS04830	921062	921280	PF0961	PFDSM3638_04830	hypothetical protein
PFDSM3638_04835	903734	904252	PF_RS04835	921442	921960	PF0962	PFDSM3638_04835	hypothetical protein
PFDSM3638_04840	904328	906841	PF_RS04840	922036	924549	PF0963	PFDSM3638_04840	AAA family ATPase
PFDSM3638_04845	906846	907601	PF_RS04845	924554	925309	PF0964	PFDSM3638_04845	hypothetical protein
PFDSM3638_04850	907666	908661	PF_RS04850	925374	926369	PF0965	PFDSM3638_04850	pyruvate ferredoxin oxidoreductase
PFDSM3638_04855	908672	909862	PF_RS04855	926380	927570	PF0966	porA	pyruvate ferredoxin oxidoreductase
PFDSM3638_04860	909873	910190	PF_RS04860	927581	927898	PF0967	porD	pyruvate ferredoxin oxidoreductase
PFDSM3638_04865	910239	911174	PF_RS04865	927947	928882	PF0968	PFDSM3638_04865	2-ketoisovalerate ferredoxin oxidoreductase
PFDSM3638_04870	911180	912364	PF_RS04870	928888	930072	PF0969	porA	pyruvate ferredoxin oxidoreductase
PFDSM3638_04875	912377	912694	PF_RS04875	930085	930402	PF0970	vorD	2-ketoisovalerate ferredoxin oxidoreductase
PFDSM3638_04880	912731	913288	PF_RS04880	930439	930996	PF0971	PFDSM3638_04880	pyruvate ferredoxin oxidoreductase
PFDSM3638_04885	913527	914579	PF_RS04885	931235	932287	PF0972	PFDSM3638_04885	hydroxymethylglutaryl-CoA synthase
PFDSM3638_04890	914593	915759	PF_RS04890	932301	933467	PF0973	PFDSM3638_04890	acetyl-CoA acetyltransferase
PFDSM3638_04895	915761	916171	PF_RS04895	933469	933879	PF0974	PFDSM3638_04895	transcriptional regulator
PFDSM3638_04900	916203	916655	PF_RS04900	933911	934363	PF0975	PFDSM3638_04900	protein frxA
PFDSM3638_04905	916657	916905	PF_RS04905	934365	934613	PF0976	PFDSM3638_04905	hypothetical protein
PFDSM3638_04910	916902	917495	PF_RS04910	934610	935203	PF0977	PFDSM3638_04910	DUF340 domain-containing protein
PFDSM3638_04915	917497	918484	PF_RS04915	935205	936191	PF0978	PFDSM3638_04915	hypothetical protein
PFDSM3638_04920	918456	918974	PF_RS04920	936163	936680	PF0979	PFDSM3638_04920	ATP:cob(I)alamin adenosyltransferase
PFDSM3638_04925	918971	919657	PF_RS04925	936677	937363	PF0980	PFDSM3638_04925	aspartate racemase
PFDSM3638_04935	919905	921158	PF_RS04935	937611	938864	PF0981	PFDSM3638_04935	MFS transporter
PFDSM3638_04940	921115	921675	PF_RS04940	938821	939381	PF0982	PFDSM3638_04940	hypothetical protein
PFDSM3638_04945	921712	922461	PF_RS04945	939418	940167	PF0983	PFDSM3638_04945	DNA polymerase III sliding clamp
PFDSM3638_04950	922451	922630	PF_RS04950	940157	940336	PF0984	PFDSM3638_04950	hypothetical protein
PFDSM3638_04955	922612	922944	PF_RS04955	940318	940650	PF0986	PFDSM3638_04955	transcription factor S
PFDSM3638_04960	923032	923655	PF_RS04960	940738	941361	-	PFDSM3638_04960	haloacid dehalogenase
PFDSM3638_04965	923642	924217	PF_RS04965	941348	941923	PF0987	PFDSM3638_04965	endonuclease V
PFDSM3638_04970	924204	924842	PF_RS04970	941910	942548	PF0988	PFDSM3638_04970	riboflavin kinase
PFDSM3638_04975	925061	926560	PF_RS04975	942767	944266	PF0989	PFDSM3638_04975	phenylalanine--tRNA ligase subunit alpha
PFDSM3638_04980	926571	928241	PF_RS04980	944277	945947	PF0990	PFDSM3638_04980	phenylalanine--tRNA ligase subunit beta
PFDSM3638_04985	928411	929457	PF_RS04985	946117	947163	PF0991	tdh	L-threonine 3-dehydrogenase
PFDSM3638_04990	929537	930466	PF_RS04990	947243	948172	PF0992	PFDSM3638_04990	type II secretion protein F
PFDSM3638_04995	930477	931544	PF_RS04995	948183	949250	PF0993	PFDSM3638_04995	type II secretion protein F
PFDSM3638_05000	931557	934982	PF_RS05000	949263	952688	PF0994	PFDSM3638_05000	secretion system protein
PFDSM3638_05005	934991	935920	PF_RS05005	952697	953626	PF0995	PFDSM3638_05005	hypothetical protein
PFDSM3638_05010	935925	937334	PF_RS05010	953631	955040	PF0996	PFDSM3638_05010	DUF515 domain-containing protein
PFDSM3638_05015	937460	937795	PF_RS05015	955166	955501	PF0997	PFDSM3638_05015	TIGR04076 family protein
PFDSM3638_05020	937749	938816	PF_RS05020	955455	956522	PF0998	PFDSM3638_05020	GTP-binding protein
PFDSM3638_05025	938929	940062	PF_RS05025	956635	957768	PF1000	PFDSM3638_05025	ABC transporter permease
PFDSM3638_05030	940064	941095	PF_RS05030	957770	958801	PF1001	PFDSM3638_05030	ABC transporter permease
PFDSM3638_05035	941225	942322	PF_RS05035	958931	960028	PF1002	PFDSM3638_05035	class I SAM-dependent RNA methyltransferase
PFDSM3638_05040	942417	943544	PF_RS05040	960123	961250	PF1003	pstS	phosphate ABC transporter substrate-binding protein PstS
PFDSM3638_05045	943558	945042	PF_RS05045	961264	962748	PF1004	PFDSM3638_05045	alkaline phosphatase
PFDSM3638_05050	945076	945918	PF_RS05050	962782	963624	PF1005	PFDSM3638_05050	sugar phosphate isomerase/epimerase
PFDSM3638_05055	945915	946835	PF_RS05055	963621	964541	PF1006	pstC	phosphate ABC transporter permease subunit PstC
PFDSM3638_05060	946783	947652	PF_RS05060	964489	965358	PF1007	pstA	phosphate ABC transporter, permease protein PstA
PFDSM3638_05065	947649	948410	PF_RS05065	965355	966116	PF1008	PFDSM3638_05065	phosphate ABC transporter ATP-binding protein
PFDSM3638_05070	948407	949000	PF_RS05070	966113	966706	PF1009	PFDSM3638_05070	phosphate transporter PhoU
PFDSM3638_05075	949063	949602	PF_RS05075	966769	967308	PF1010	PFDSM3638_05075	PhoU family transcriptional regulator
PFDSM3638_05080	949706	950590	PF_RS05080	967412	968296	PF1011	PFDSM3638_05080	ABC transporter ATP-binding protein
PFDSM3638_05085	950587	951768	PF_RS05085	968293	969474	PF1012	PFDSM3638_05085	ABC transporter permease
PFDSM3638_05090	952059	952448	PF_RS05090	969765	970154	PF1013	PFDSM3638_05090	hypothetical protein
PFDSM3638_05095	952453	953013	PF_RS05095	970159	970719	PF1014	PFDSM3638_05095	hypothetical protein
PFDSM3638_05100	953010	953324	PF_RS05100	970716	971030	-	PFDSM3638_05100	hypothetical protein
PFDSM3638_05105	953339	954553	PF_RS05105	971045	972259	PF1015	PFDSM3638_05105	transposase
PFDSM3638_05110	955132	955815	PF_RS05110	972838	973521	PF1016	PFDSM3638_05110	FAA hydrolase family protein
PFDSM3638_05115	955821	956609	PF_RS05115	973527	974315	PF1017	PFDSM3638_05115	acyltransferase
PFDSM3638_05120	957019	957672	PF_RS05125	974725	975378	PF1019	PFDSM3638_05120	exonuclease SbcD
PFDSM3638_05125	957744	958982	PF_RS05130	975450	976688	PF1020	PFDSM3638_05125	phosphate permease
PFDSM3638_05130	958987	959655	PF_RS05135	976693	977361	PF1021	PFDSM3638_05130	TIGR00153 family protein
PFDSM3638_05135	959662	959889	PF_RS05140	977368	977595	PF1022	PFDSM3638_05135	AsnC family transcriptional regulator
PFDSM3638_05140	959956	960657	PF_RS05145	977662	978363	PF1023	PFDSM3638_05140	IS6 family transposase ISPfu5
PFDSM3638_05145	960790	962223	PF_RS05150	978496	979929	PF1024	PFDSM3638_05145	cysteine--tRNA ligase
PFDSM3638_05150	962220	963278	PF_RS05155	979926	980984	PF1025	PFDSM3638_05150	hypothetical protein
PFDSM3638_05155	963366	964673	PF_RS05160	981072	982379	PF1026	PFDSM3638_05155	NAD-dependent malic enzyme
PFDSM3638_05160	964720	965841	PF_RS05165	982426	983547	PF1027	PFDSM3638_05160	site-specific DNA-methyltransferase
PFDSM3638_05165	965945	966907	PF_RS05170	983651	984613	PF1028	PFDSM3638_05165	hypothetical protein
PFDSM3638_05170	966912	967760	PF_RS05175	984618	985466	PF1029	PFDSM3638_05170	transcriptional regulator
PFDSM3638_05175	967836	970010	PF_RS05180	985542	987716	PF1030	PFDSM3638_05175	methionine--tRNA ligase
PFDSM3638_05180	970003	970314	PF_RS05185	987709	988020	PF1031	PFDSM3638_05180	divalent-cation tolerance protein CutA
PFDSM3638_05185	970320	971483	PF_RS05190	988026	989189	PF1032	PFDSM3638_05185	Nonsense-mediated mRNA decay NMD3 like protein
PFDSM3638_05190	971552	972202	PF_RS05195	989258	989908	PF1033	PFDSM3638_05190	peroxiredoxin
PFDSM3638_05195	972337	972885	PF_RS05200	990043	990591	PF1034	PFDSM3638_05195	orotate phosphoribosyltransferase
PFDSM3638_05200	973084	973377	PF_RS05205	990790	991083	PF1035	PFDSM3638_05200	50S ribosomal protein L21e
PFDSM3638_05205	973384	973746	PF_RS05210	991090	991452	PF1036	PFDSM3638_05205	DNA-directed RNA polymerase subunit F
PFDSM3638_05210	973844	974062	PF_RS05215	991550	991768	PF1037	PFDSM3638_05210	hypothetical protein
PFDSM3638_05215	974051	974668	PF_RS05220	991757	992374	PF1038	PFDSM3638_05215	hypothetical protein
PFDSM3638_05220	974739	975494	PF_RS05225	992445	993200	PF1039	PFDSM3638_05220	geranylgeranylglyceryl/heptaprenylglyceryl phosphate synthase
PFDSM3638_05225	975491	975919	PF_RS05230	993197	993625	PF1040	PFDSM3638_05225	DUF123 domain-containing protein
PFDSM3638_05230	975873	977681	PF_RS05235	993579	995387	PF1041	PFDSM3638_05230	ATPase
PFDSM3638_05235	977780	978382	PF_RS05240	995486	996088	PF1042	PFDSM3638_05235	rubrerythrin family protein
PFDSM3638_05240	978468	979688	PF_RS05245	996174	997394	PF1043	PFDSM3638_05240	hypothetical protein
PFDSM3638_05245	979691	980137	PF_RS05250	997397	997843	PF1044	PFDSM3638_05245	DUF2258 domain-containing protein
PFDSM3638_05250	980197	980859	PF_RS05255	997903	998565	PF1045	PFDSM3638_05250	adenylate kinase
PFDSM3638_05255	980897	982654	PF_RS05260	998603	1000360	PF1046	PFDSM3638_05255	tRNA-guanine(15) transglycosylase
PFDSM3638_05260	982692	982991	PF_RS05265	1000398	1000697	PF1047	PFDSM3638_05260	hypothetical protein
PFDSM3638_05265	982971	984095	PF_RS05270	1000677	1001801	PF1048	PFDSM3638_05265	alkaline phosphatase family protein
PFDSM3638_05270	984197	985210	PF_RS05275	1001903	1002916	PF1049	PFDSM3638_05270	radical SAM protein
PFDSM3638_05275	985216	985566	PF_RS05280	1002922	1003272	PF1050	PFDSM3638_05275	hypothetical protein
PFDSM3638_05280	985594	988194	PF_RS05285	1003300	1005900	PF1051	PFDSM3638_05280	helicase
PFDSM3638_05285	988334	989455	PF_RS05290	1006040	1007161	PF1052	PFDSM3638_05285	aspartate kinase
PFDSM3638_05290	989466	990545	PF_RS05295	1007172	1008251	PF1053	PFDSM3638_05290	aspartate kinase
PFDSM3638_05295	990496	991374	PF_RS05300	1008202	1009080	PF1054	PFDSM3638_05295	homoserine kinase
PFDSM3638_05300	991365	992549	PF_RS05305	1009071	1010255	PF1055	PFDSM3638_05300	threonine synthase
PFDSM3638_05305	992546	993550	PF_RS05310	1010252	1011256	PF1056	asd	aspartate-semialdehyde dehydrogenase
PFDSM3638_05310	993757	994989	PF_RS05315	1011463	1012695	PF1057	pgk	phosphoglycerate kinase
PFDSM3638_05315	995045	996313	PF_RS05320	1012751	1014019	PF1058	PFDSM3638_05315	CDP-alcohol phosphatidyltransferase
PFDSM3638_05320	996306	997481	PF_RS05325	1014012	1015187	PF1059	PFDSM3638_05320	methyltransferase
PFDSM3638_05325	997450	998073	PF_RS05330	1015156	1015779	PF1060	PFDSM3638_05325	hypothetical protein
PFDSM3638_05330	998145	998348	PF_RS05335	1015851	1016054	PF1061	PFDSM3638_05330	thiamine biosynthesis protein ThiS
PFDSM3638_05335	998440	998712	PF_RS05340	1016146	1016418	PF1062	PFDSM3638_05335	hypothetical protein
PFDSM3638_05340	998744	999778	PF_RS05345	1016450	1017484	PF1063	dph2	diphthamide biosynthesis enzyme Dph2
PFDSM3638_05345	999741	1000142	PF_RS05350	1017447	1017848	PF1064	PFDSM3638_05345	hypothetical protein
PFDSM3638_05350	1000137	1000895	PF_RS05355	1017843	1018601	PF1065	PFDSM3638_05350	Nif3-like dinuclear metal center hexameric protein
PFDSM3638_05355	1000952	1002112	PF_RS05360	1018658	1019818	PF1066	PFDSM3638_05355	aminotransferase class V-fold PLP-dependent enzyme
PFDSM3638_05360	1002763	1003146	PF_RS05365	1020469	1020852	PF1069	PFDSM3638_05360	30S ribosomal protein S8e
PFDSM3638_05365	1003124	1003546	PF_RS05370	1020830	1021252	PF1070	PFDSM3638_05365	metalloprotease
PFDSM3638_05370	1003632	1005047	PF_RS05375	1021338	1022753	PF1071	PFDSM3638_05370	asparagine synthase
PFDSM3638_05375	1005174	1005587	PF_RS05380	1022880	1023293	PF1072	PFDSM3638_05375	ArsR family transcriptional regulator
PFDSM3638_05380	1005580	1006872	PF_RS05385	1023286	1024578	PF1073	PFDSM3638_05380	hypothetical protein
PFDSM3638_05385	1006874	1007518	PF_RS05390	1024580	1025224	PF1074	PFDSM3638_05385	hypothetical protein
PFDSM3638_05390	1007554	1008276	PF_RS05395	1025260	1025983	PF1075	PFDSM3638_05390	sulfite exporter TauE/SafE family protein
PFDSM3638_05395	1008360	1009781	PF_RS05400	1026067	1027488	PF1076	PFDSM3638_05395	TldD-like protein
PFDSM3638_05400	1009793	1011115	PF_RS05405	1027500	1028822	PF1077	PFDSM3638_05400	TldE-like protein
PFDSM3638_05405	1011134	1012322	PF_RS05410	1028841	1030029	PF1079	PFDSM3638_05405	TIGR00529 family membrane protein
PFDSM3638_05410	1012694	1013416	PF_RS05415	1030401	1031123	PF1080	PFDSM3638_05410	hypothetical protein
PFDSM3638_05415	1013421	1013783	PF_RS05420	1031128	1031490	PF1081	PFDSM3638_05415	hypothetical protein
PFDSM3638_05420	1014483	1015724	PF_RS05425	1032190	1033431	PF1083	PFDSM3638_05420	oxidoreductase
PFDSM3638_05425	1015721	1016203	PF_RS05430	1033428	1033910	PF1084	PFDSM3638_05425	phosphopantetheine adenylyltransferase
PFDSM3638_05430	1016250	1017578	PF_RS05435	1033957	1035285	PF1085	PFDSM3638_05430	CoA-binding protein
PFDSM3638_05435	1017565	1017789	PF_RS05440	1035272	1035496	PF1085.1n	PFDSM3638_05435	hypothetical protein
PFDSM3638_05440	1017896	1018318	PF_RS05445	1035603	1036025	PF1086	PFDSM3638_05440	DUF371 domain-containing protein
PFDSM3638_05445	1018342	1018680	PF_RS05450	1036049	1036387	PF1087	PFDSM3638_05445	hypothetical protein
PFDSM3638_05450	1018714	1019016	PF_RS05455	1036421	1036723	PF1088	PFDSM3638_05450	transcriptional regulator
PFDSM3638_05455	1019016	1019522	PF_RS05460	1036723	1037229	PF1089	PFDSM3638_05455	hypothetical protein
PFDSM3638_05460	1019583	1020191	PF_RS05465	1037290	1037898	PF1090	PFDSM3638_05460	ABC transporter ATP-binding protein
PFDSM3638_05465	1020188	1020616	PF_RS05470	1037895	1038323	PF1091	PFDSM3638_05465	hypothetical protein
PFDSM3638_05470	1020618	1021748	PF_RS05475	1038325	1039455	PF1092	PFDSM3638_05470	hypothetical protein
PFDSM3638_05475	1021745	1022020	PF_RS05480	1039452	1039727	PF1093	PFDSM3638_05475	hypothetical protein
PFDSM3638_05480	1022237	1022518	PF_RS05485	1039944	1040225	PF1093.1n	PFDSM3638_05480	hypothetical protein
PFDSM3638_05485	1022515	1022826	PF_RS05490	1040222	1040533	PF1095	PFDSM3638_05485	hypothetical protein
PFDSM3638_05490	1023020	1026220	PF_RS05495	1040727	1043927	PF1096	PFDSM3638_05490	isoleucine--tRNA ligase
PFDSM3638_05495	1026350	1027414	PF_RS05500	1044057	1045121	PF1097	PFDSM3638_05495	ATP-binding protein
PFDSM3638_05500	1027457	1028059	PF_RS05505	1045164	1045766	PF1098	PFDSM3638_05500	hypothetical protein
PFDSM3638_05505	1028046	1028990	PF_RS05510	1045753	1046697	PF1099	PFDSM3638_05505	formamidase
PFDSM3638_05510	1029424	1030410	PF_RS05515	1047131	1048117	PF1100	PFDSM3638_05510	hypothetical protein
PFDSM3638_05515	1030507	1031826	PF_RS05520	1048214	1049533	PF1101	PFDSM3638_05515	ribonuclease J
PFDSM3638_05520	1031840	1032862	PF_RS05525	1049547	1050569	PF1102	PFDSM3638_05520	polyprenyl synthetase family protein
PFDSM3638_05525	1032926	1033759	PF_RS05530	1050633	1051466	PF1103	ppnK	NAD(+) kinase
PFDSM3638_05530	1033760	1034722	PF_RS05535	1051467	1052429	PF1104	PFDSM3638_05530	homoserine dehydrogenase
PFDSM3638_05535	1034830	1035366	PF_RS05540	1052537	1053073	PF1105	PFDSM3638_05535	nicotinamidase
PFDSM3638_05540	1035353	1036333	PF_RS05545	1053060	1054040	PF1106	PFDSM3638_05540	AI-2E family transporter
PFDSM3638_05545	1036323	1036763	PF_RS05550	1054030	1054470	PF1107	PFDSM3638_05545	HIT family protein
PFDSM3638_05555	1036957	1038171	PF_RS05560	1054664	1055878	PF1108	PFDSM3638_05555	phosphonate ABC transporter ATP-binding protein
PFDSM3638_05560	1038245	1041643	PF_RS05565	1055952	1059349	PF1109/10	PFDSM3638_05560	hypothetical protein
PFDSM3638_05565	1041682	1042731	PF_RS05570	1059388	1060437	PF1111	PFDSM3638_05565	putative methyltransferase
PFDSM3638_05570	1042876	1043706	PF_RS05575	1060582	1061406	PF1112	PFDSM3638_05570	hypothetical protein
PFDSM3638_05575	1043707	1043904	PF_RS05580	1061413	1061610	PF1112.1n	PFDSM3638_05575	hypothetical protein
PFDSM3638_05580	1044213	1044803	PF_RS05585	1061907	1062507	PF1113	PFDSM3638_05580	hypothetical protein
PFDSM3638_05585	1044800	1045435	PF_RS05590	1062504	1063139	PF1114	pyrF	orotidine-5'-phosphate decarboxylase
PFDSM3638_05590	1045420	1045938	PF_RS05595	1063124	1063642	PF1115	PFDSM3638_05590	RNA-binding protein
PFDSM3638_05595	1045917	1046363	PF_RS05600	1063621	1064067	PF1116	PFDSM3638_05595	FAD synthase
PFDSM3638_05600	1049355	1049612	PF_RS05610	1066025	1066282	PF1117	cas2	CRISPR-associated endonuclease Cas2
PFDSM3638_05605	1049609	1050577	PF_RS05615	1066279	1067247	PF1118	PFDSM3638_05605	type I-B CRISPR-associated endonuclease Cas1
PFDSM3638_05610	1050582	1051091	PF_RS05620	1067252	1067761	PF1119	cas4	CRISPR-associated protein Cas4
PFDSM3638_05615	1051091	1053265	PF_RS05625	1067761	1069935	PF1120	PFDSM3638_05615	CRISPR-associated helicase/endonuclease Cas3
PFDSM3638_05620	1053262	1053891	PF_RS05630	1069932	1070561	PF1121	cas5b	type I-B CRISPR-associated protein Cas5
PFDSM3638_05625	1053902	1054957	PF_RS05635	1070572	1071627	PF1122	cas7i	type I-B CRISPR-associated protein Cas7/Cst2/DevR
PFDSM3638_05630	1054954	1056291	PF_RS05640	1071624	1072961	PF1123	cas8a1	type I-B CRISPR-associated protein Cas8b1/Cst1
PFDSM3638_05635	1056284	1057306	PF_RS05645	1072954	1073976	PF1124	cmr6	type III-B CRISPR module RAMP protein Cmr6
PFDSM3638_05640	1057290	1057799	PF_RS05650	1073960	1074469	PF1125	cmr5	type III-B CRISPR module-associated protein Cmr5
PFDSM3638_05645	1057777	1058664	PF_RS05655	1074447	1075334	PF1126	cmr4	type III-B CRISPR module RAMP protein Cmr4
PFDSM3638_05650	1058661	1060103	PF_RS05660	1075331	1076773	PF1127	PFDSM3638_05650	TIGR01897 family CRISPR-associated protein
PFDSM3638_05655	1060094	1061062	PF_RS05665	1076764	1077732	PF1128	cmr3	type III-B CRISPR module-associated protein Cmr3
PFDSM3638_05660	1061059	1063674	PF_RS05670	1077729	1080344	PF1129	cas10	type III-B CRISPR-associated protein Cas10/Cmr2
PFDSM3638_05665	1063667	1064680	PF_RS05675	1080337	1081353	PF1130	cmr1	type III-B CRISPR module RAMP protein Cmr1
PFDSM3638_05670	1064798	1065592	PF_RS05680	1081470	1082264	PF1131	cas6	CRISPR-associated endoribonuclease Cas6
PFDSM3638_05675	1065701	1067311	PF_RS05685	1082373	1083983	PF1132	PFDSM3638_05675	carbamoyl transferase
PFDSM3638_05680	1067344	1067550	PF_RS05690	1084016	1084222	PF1133	PFDSM3638_05680	hypothetical protein
PFDSM3638_05685	1067685	1068227	PF_RS05695	1084357	1084899	PF1134	PFDSM3638_05685	kinase
PFDSM3638_05690	1068230	1069099	PF_RS05700	1084902	1085771	PF1135	PFDSM3638_05690	protease
PFDSM3638_05695	1069172	1071295	PF_RS05705	1085844	1087967	PF1136	PFDSM3638_05695	restriction endonuclease
PFDSM3638_05700	1071329	1074283	PF_RS05710	1088001	1090955	PF1137	PFDSM3638_05700	intein-containing translation initiation factor IF-2
PFDSM3638_05705	1075664	1076926	PF_RS05715	1092336	1093598	PF1138	PFDSM3638_05705	UbiD family decarboxylase
PFDSM3638_05710	1076907	1078073	PF_RS05720	1093579	1094745	PF1139	PFDSM3638_05710	tRNA pseudouridine(54/55) synthase Pus10
PFDSM3638_05715	1078139	1078966	PF_RS05725	1094811	1095638	PF1140	PFDSM3638_05715	translation initiation factor IF-2 subunit alpha
PFDSM3638_05720	1078972	1079154	PF_RS05730	1095644	1095826	PF1141	PFDSM3638_05720	ribosome biogenesis protein
PFDSM3638_05725	1079151	1079954	PF_RS05735	1095823	1096626	PF1142	PFDSM3638_05725	proteasome assembly chaperone family protein
PFDSM3638_05730	1079983	1080834	PF_RS05740	1096655	1097506	PF1143	panB	3-methyl-2-oxobutanoate hydroxymethyltransferase
PFDSM3638_05735	1080824	1081627	PF_RS05745	1097496	1098299	PF1144	PFDSM3638_05735	EamA family transporter
PFDSM3638_05740	1081611	1082498	PF_RS05750	1098283	1099170	PF1145	PFDSM3638_05740	ATP-binding protein
PFDSM3638_05745	1082626	1082823	PF_RS05755	1099298	1099495	PF1146	PFDSM3638_05745	hypothetical protein
PFDSM3638_05750	1082832	1084295	PF_RS05760	1099504	1100967	PF1147	PFDSM3638_05750	cation:proton antiporter
PFDSM3638_05755	1084292	1084564	PF_RS05765	1100964	1101236	PF1148	PFDSM3638_05755	cation:proton antiporter
PFDSM3638_05760	1084567	1084950	PF_RS05770	1101239	1101622	PF1149	PFDSM3638_05760	cation:proton antiporter
PFDSM3638_05765	1084950	1085417	PF_RS05775	1101622	1102089	PF1150	PFDSM3638_05765	cation:proton antiporter
PFDSM3638_05770	1085398	1085712	PF_RS05780	1102070	1102384	PF1151	PFDSM3638_05770	cation:proton antiporter
PFDSM3638_05775	1085709	1085978	PF_RS05785	1102381	1102650	PF1152	PFDSM3638_05775	cation:proton antiporter
PFDSM3638_05780	1085954	1086559	PF_RS05790	1102626	1103231	PF1153	PFDSM3638_05780	cation:proton antiporter
PFDSM3638_05785	1086556	1087308	PF_RS05795	1103228	1103980	PF1154	PFDSM3638_05785	NAD-dependent deacylase
PFDSM3638_05790	1087384	1087911	PF_RS05800	1104056	1104583	PF1155	PFDSM3638_05790	ASCH domain-containing protein
PFDSM3638_05795	1087913	1089175	PF_RS05805	1104585	1105847	PF1156	rbcL	ribulose-bisphosphate carboxylase large subunit
PFDSM3638_05800	1089279	1090445	PF_RS05810	1105951	1107117	PF1157	PFDSM3638_05800	magnesium transporter MgtE
PFDSM3638_05805	1090438	1091262	PF_RS05815	1107110	1107934	PF1158	PFDSM3638_05805	radical SAM protein
PFDSM3638_05810	1091259	1092407	PF_RS05820	1107931	1109080	PF1159	PFDSM3638_05810	tyrosine decarboxylase MfnA
PFDSM3638_05815	1092407	1093015	PF_RS05825	1109080	1109688	PF1160	PFDSM3638_05815	phosphatidate cytidylyltransferase
PFDSM3638_05820	1093049	1093684	PF_RS05830	1109722	1110357	PF1161	PFDSM3638_05820	HAD family hydrolase
PFDSM3638_05825	1093738	1093989	PF_RS05835	1110411	1110662	PF1163	PFDSM3638_05825	DUF131 domain-containing protein
PFDSM3638_05830	1093991	1095172	PF_RS05840	1110664	1111845	PF1164	PFDSM3638_05830	cation:proton antiporter
PFDSM3638_05835	1095193	1096848	PF_RS05845	1111866	1113521	PF1165	PFDSM3638_05835	DNA helicase
PFDSM3638_05840	1096864	1098150	PF_RS05850	1113537	1114823	PF1166	PFDSM3638_05840	exonuclease SbcCD subunit D
PFDSM3638_05845	1098147	1100795	PF_RS05855	1114820	1117468	PF1167	PFDSM3638_05845	DNA repair protein Rad50
PFDSM3638_05850	1100792	1102147	PF_RS05860	1117465	1118820	PF1168	PFDSM3638_05850	5'-3' exonuclease
PFDSM3638_05855	1102166	1102465	PF_RS05865	1118839	1119138	PF1169	PFDSM3638_05855	hypothetical protein
PFDSM3638_05860	1102490	1102759	PF_RS05870	1119163	1119432	PF1170	PFDSM3638_05860	hypothetical protein
PFDSM3638_05865	1102753	1103328	PF_RS05875	1119426	1120001	PF1171	PFDSM3638_05865	hypothetical protein
PFDSM3638_05875	1103737	1104972	PF_RS05885	1120410	1121645	PF1172	PFDSM3638_05875	23S rRNA (uracil(1939)-C(5))-methyltransferase RlmD
PFDSM3638_05880	1104955	1105347	PF_RS05890	1121628	1122020	PF1173	PFDSM3638_05880	thioesterase
PFDSM3638_05885	1105401	1105814	PF_RS05895	1122074	1122487	PF1174	PFDSM3638_05885	hypothetical protein
PFDSM3638_05890	1105814	1106446	PF_RS05900	1122487	1123119	PF1175	PFDSM3638_05890	class I SAM-dependent methyltransferase
PFDSM3638_05895	1106447	1106740	PF_RS05905	1123120	1123413	PF1176	PFDSM3638_05895	DUF3216 domain-containing protein
PFDSM3638_05900	1106764	1108056	PF_RS05910	1123437	1124729	PF1177	hflX	GTPase HflX
PFDSM3638_05905	1108040	1108981	PF_RS05915	1124713	1125654	PF1178	PFDSM3638_05905	inorganic phosphate transporter
PFDSM3638_05910	1109044	1109247	PF_RS05920	1125717	1125920	PF1179	PFDSM3638_05910	hypothetical protein
PFDSM3638_05915	1109321	1110472	PF_RS05925	1125994	1127145	PF1180	thrC	threonine synthase
PFDSM3638_05920	1110475	1111809	PF_RS05930	1127148	1128482	PF1181	PFDSM3638_05920	hypothetical protein
PFDSM3638_05925	1111977	1112486	PF_RS05935	1128650	1129160	PF1182	PFDSM3638_05925	thioredoxin
PFDSM3638_05930	1112529	1112915	PF_RS05940	1129203	1129589	PF1183	PFDSM3638_05930	hypothetical protein
PFDSM3638_05935	1112946	1113668	PF_RS05945	1129620	1130342	PF1184	PFDSM3638_05935	DUF72 domain-containing protein
PFDSM3638_05940	1113828	1114880	PF_RS05950	1130502	1131554	PF1185	PFDSM3638_05940	acetylornithine deacetylase
PFDSM3638_05945	1114877	1116205	PF_RS05955	1131551	1132879	PF1186	cdr	CoA-disulfide reductase
PFDSM3638_05950	1116264	1117331	PF_RS05960	1132938	1134005	PF1187	PFDSM3638_05950	DUF1464 domain-containing protein
PFDSM3638_05955	1117396	1118820	PF_RS05965	1134070	1135494	PF1188	pyk	pyruvate kinase
PFDSM3638_05960	1118831	1119154	PF_RS05970	1135505	1135828	PF1189	PFDSM3638_05960	DUF59 domain-containing protein
PFDSM3638_05965	1119192	1119716	PF_RS05975	1135866	1136390	PF1190	PFDSM3638_05965	rubrerythrin
PFDSM3638_05970	1119720	1120757	PF_RS05980	1136394	1137432	PF1191	PFDSM3638_05970	rubrerythrin
PFDSM3638_05975	1120837	1121394	PF_RS05990	1137512	1138069	PF1193	PFDSM3638_05975	DNA protection protein DPS
PFDSM3638_05980	1121500	1121883	PF_RS05995	1138175	1138558	PF1194	PFDSM3638_05980	transcriptional repressor
PFDSM3638_05985	1121891	1122370	PF_RS06000	1138566	1139045	PF1195	PFDSM3638_05985	rubrerythrin
PFDSM3638_05990	1122466	1123020	PF_RS06005	1139141	1139695	PF1196	PFDSM3638_05990	rubrerythrin
PFDSM3638_05995	1123025	1124104	PF_RS06010	1139700	1140779	PF1197	PFDSM3638_05995	NAD(P)/FAD-dependent oxidoreductase
PFDSM3638_06000	1124087	1124779	PF_RS06015	1140762	1141454	PF1198	PFDSM3638_06000	DNA/RNA nuclease SfsA
PFDSM3638_06005	1124782	1125306	PF_RS06020	1141457	1141981	PF1199	PFDSM3638_06005	rubrerythrin
PFDSM3638_06010	1125372	1126073	PF_RS06025	1142047	1142747	PF1200	PFDSM3638_06010	IS6 family transposase ISPfu2
PFDSM3638_06015	1126200	1126694	PF_RS06030	1142874	1143368	PF1201	PFDSM3638_06015	DUF2118 domain-containing protein
PFDSM3638_06020	1126870	1128729	PF_RS06035	1143544	1145403	PF1203	PFDSM3638_06020	aldehyde ferredoxin oxidoreductase
PFDSM3638_06025	1128802	1130169	PF_RS06040	1145476	1146843	PF1204	PFDSM3638_06025	serine--tRNA ligase
PFDSM3638_06030	1130166	1130633	PF_RS06045	1146840	1147307	PF1205	PFDSM3638_06030	hypothetical protein
PFDSM3638_06035	1130630	1131100	PF_RS06050	1147304	1147774	PF1206	PFDSM3638_06035	hypothetical protein
PFDSM3638_06040	1131097	1131327	PF_RS06055	1147771	1148001	PF1207	PFDSM3638_06040	hypothetical protein
PFDSM3638_06045	1131331	1132863	PF_RS06060	1148005	1149537	PF1208	PFDSM3638_06045	glycoside hydrolase family 1 protein
PFDSM3638_06050	1133035	1134903	PF_RS06065	1149709	1151577	PF1209	PFDSM3638_06050	ABC transporter substrate-binding protein
PFDSM3638_06055	1134974	1135960	PF_RS06070	1151648	1152634	PF1210	PFDSM3638_06055	ABC transporter permease
PFDSM3638_06060	1135965	1136897	PF_RS06075	1152639	1153571	PF1211	PFDSM3638_06060	ABC transporter permease
PFDSM3638_06065	1136899	1137867	PF_RS06080	1153573	1154541	PF1212	PFDSM3638_06065	ABC transporter ATP-binding protein
PFDSM3638_06070	1137860	1138810	PF_RS06085	1154534	1155484	PF1213	PFDSM3638_06070	ABC transporter ATP-binding protein
PFDSM3638_06075	1138994	1139491	PF_RS06090	1155668	1156165	PF1214	PFDSM3638_06075	transcription elongation factor NusA
PFDSM3638_06080	1139830	1140084	PF_RS06095	1156504	1156758	PF1214.2n	PFDSM3638_06080	hypothetical protein
PFDSM3638_06085	1140101	1140554	PF_RS06100	1156775	1157228	-	PFDSM3638_06085	threonylcarbamoyl-AMP synthase
PFDSM3638_06090	1141092	1141478	PF_RS10690	1157766	1158152	-	PFDSM3638_06090	hypothetical protein
PFDSM3638_06095	1141417	1141794	PF_RS06105	1158091	1158468	PF1219	PFDSM3638_06095	hypothetical protein
PFDSM3638_06100	1141745	1141927	PF_RS10695	1158419	1158601	-	PFDSM3638_06100	hypothetical protein
PFDSM3638_06105	1142000	1142997	PF_RS06110	1158674	1158880	PF1220	PFDSM3638_06105	sulfate adenylyltransferase
PFDSM3638_06105	1142000	1142997	PF_RS06115	1158892	1159671	PF1221	PFDSM3638_06105	sulfate adenylyltransferase
PFDSM3638_06110	1143094	1143330	PF_RS06120	1159768	1160004	PF1222	PFDSM3638_06110	antitoxin
PFDSM3638_06115	1143303	1143674	PF_RS06125	1159977	1160348	PF1223	PFDSM3638_06115	PIN domain-containing protein
PFDSM3638_06120	1144456	1144856	PF_RS06130	1161130	1161530	PF1225	PFDSM3638_06120	nucleotidyltransferase
PFDSM3638_06125	1144975	1145676	PF_RS06135	1161649	1162350	-	PFDSM3638_06125	IS6 family transposase ISPfu1
PFDSM3638_06130	1145739	1146320	PF_RS06140	1162413	1162994	PF1228	PFDSM3638_06130	rhomboid family intramembrane serine protease
PFDSM3638_06135	1146317	1146994	PF_RS06145	1162991	1163668	PF1229	PFDSM3638_06135	endonuclease III
PFDSM3638_06140	1146957	1147409	PF_RS06150	1163631	1164083	PF1230	PFDSM3638_06140	ATPase
PFDSM3638_06145	1147393	1147839	PF_RS06155	1164067	1164513	PF1231	PFDSM3638_06145	transcriptional regulator
PFDSM3638_06150	1147962	1149293	PF_RS06160	1164636	1165967	PF1232	PFDSM3638_06150	aspartate aminotransferase family protein
PFDSM3638_06155	1149940	1152093	PF_RS06165	1166614	1168767	PF1233	PFDSM3638_06155	chitinase
PFDSM3638_06160	1152131	1153168	PF_RS06170	1168805	1169842	PF1234	PFDSM3638_06160	chitinase
PFDSM3638_06165	1153497	1153868	PF_RS06175	1170171	1170542	PF1235	PFDSM3638_06165	fluoride efflux transporter CrcB
PFDSM3638_06170	1153874	1154254	PF_RS06180	1170548	1170928	PF1236	PFDSM3638_06170	hypothetical protein
PFDSM3638_06175	1154316	1154672	PF_RS06185	1170990	1171346	PF1237	PFDSM3638_06175	hypothetical protein
PFDSM3638_06180	1154717	1156615	PF_RS06190	1171391	1173289	PF1238	PFDSM3638_06180	ABC transporter ATP-binding protein
PFDSM3638_06185	1156612	1157070	PF_RS06195	1173286	1173744	PF1239	PFDSM3638_06185	hypothetical protein
PFDSM3638_06190	1157142	1158425	PF_RS06200	1173816	1175099	PF1240	PFDSM3638_06190	uracil permease
PFDSM3638_06195	1158430	1159128	PF_RS06205	1175104	1175802	PF1241	upp	uracil phosphoribosyltransferase
PFDSM3638_06200	1159097	1161022	PF_RS06210	1175771	1177696	PF1242	PFDSM3638_06200	dehydrogenase
PFDSM3638_06205	1161038	1161325	PF_RS06215	1177712	1177999	PF1243	PFDSM3638_06205	hypothetical protein
PFDSM3638_06210	1161328	1161606	PF_RS06220	1178002	1178280	PF1244	PFDSM3638_06210	hypothetical protein
PFDSM3638_06215	1161780	1163249	PF_RS06225	1178454	1179923	PF1245	PFDSM3638_06215	D-nopaline dehydrogenase
PFDSM3638_06220	1163255	1164403	PF_RS06230	1179929	1181077	PF1246	PFDSM3638_06220	FAD-binding oxidoreductase
PFDSM3638_06225	1164555	1165505	PF_RS06235	1181229	1182179	PF1247	PFDSM3638_06225	ABC transporter permease
PFDSM3638_06230	1165476	1166347	PF_RS10700	1182150	1183021	PF1248	PFDSM3638_06230	IS982 family transposase
PFDSM3638_06235	1166468	1167394	PF_RS06250	1183142	1184068	PF1249	PFDSM3638_06235	ABC transporter ATP-binding protein
PFDSM3638_06240	1167391	1169589	PF_RS06255	1184065	1184685	PF1250	PFDSM3638_06240	hypothetical protein
PFDSM3638_06240	1167391	1169589	PF_RS06260	1185080	1186264	PF1251	PFDSM3638_06240	hypothetical protein
PFDSM3638_06245	1169593	1170582	PF_RS06265	1186268	1187257	PF1252	PFDSM3638_06245	ABC transporter permease
PFDSM3638_06250	1170575	1171744	PF_RS06270	1187250	1188419	PF1253	PFDSM3638_06250	pyridoxal phosphate-dependent aminotransferase
PFDSM3638_06255	1171912	1173474	PF_RS06275	1188587	1190149	PF1254	PFDSM3638_06255	Na+dependent transporter
PFDSM3638_06260	1173631	1174365	PF_RS06280	1190306	1191040	PF1256	PFDSM3638_06260	alkaline-shock protein
PFDSM3638_06265	1174362	1175294	PF_RS06285	1191037	1191969	PF1257	PFDSM3638_06265	SAM-dependent tRNA/rRNA cytosine-C5 methylase
PFDSM3638_06270	1175296	1175985	PF_RS06290	1191971	1192660	PF1258	PFDSM3638_06270	ribose-5-phosphate isomerase RpiA
PFDSM3638_06275	1175989	1176312	PF_RS06295	1192664	1192984	PF1259	PFDSM3638_06275	hypothetical protein
PFDSM3638_06280	1176363	1177277	PF_RS06300	1193034	1193948	PF1260	PFDSM3638_06280	hypothetical protein
PFDSM3638_06285	1177279	1177851	PF_RS06305	1193950	1194522	PF1261	PFDSM3638_06285	metallophosphoesterase
PFDSM3638_06290	1177898	1178569	PF_RS06310	1194569	1195240	PF1262	PFDSM3638_06290	16S rRNA methyltransferase
PFDSM3638_06295	1178631	1180004	PF_RS06315	1195302	1196675	PF1263	PFDSM3638_06295	hypothetical protein
PFDSM3638_06300	1180066	1180482	PF_RS06320	1196737	1197153	PF1264	PFDSM3638_06300	translation initiation factor IF-5A
PFDSM3638_06305	1180503	1181855	PF_RS06325	1197174	1198526	PF1265	PFDSM3638_06305	SAM-dependent tRNA/rRNA cytosine-C5 methylase
PFDSM3638_06310	1181997	1183097	PF_RS06330	1198668	1199768	PF1266	PFDSM3638_06310	cystathionine gamma-synthase
PFDSM3638_06315	1183100	1184122	PF_RS06335	1199771	1200793	PF1267	PFDSM3638_06315	5,10-methylenetetrahydrofolate reductase
PFDSM3638_06320	1184135	1185064	PF_RS06340	1200806	1201735	PF1268	PFDSM3638_06320	5-methyltetrahydropteroyltriglutamate-- homocysteine methyltransferase
PFDSM3638_06325	1185066	1186082	PF_RS06345	1201737	1202753	PF1269	PFDSM3638_06325	methionine synthase
PFDSM3638_06330	1186079	1186978	PF_RS06350	1202750	1203649	PF1270	PFDSM3638_06330	hypothetical protein
PFDSM3638_06340	1187213	1187524	PF_RS06360	1203884	1204195	PF1271	PFDSM3638_06340	hypothetical protein
PFDSM3638_06345	1187908	1188675	PF_RS06365	1204579	1205346	PF1272	PFDSM3638_06345	LamB/YcsF family protein
PFDSM3638_06350	1188672	1189355	PF_RS06370	1205343	1206026	PF1273	PFDSM3638_06350	allophanate hydrolase
PFDSM3638_06355	1189348	1190337	PF_RS06375	1206019	1207008	PF1274	PFDSM3638_06355	urea amidolyase
PFDSM3638_06360	1190373	1190681	PF_RS06380	1207044	1207352	PF1275	PFDSM3638_06360	DUF424 domain-containing protein
PFDSM3638_06365	1190678	1190959	PF_RS06385	1207349	1207630	PF1276	PFDSM3638_06365	hypothetical protein
PFDSM3638_06370	1190960	1191721	PF_RS06390	1207631	1208392	PF1277	PFDSM3638_06370	7-carboxy-7-deazaguanine synthase
PFDSM3638_06375	1191718	1192062	PF_RS06395	1208389	1208733	PF1278	PFDSM3638_06375	6-pyruvoyl tetrahydropterin synthase
PFDSM3638_06380	1192103	1192648	PF_RS06400	1208774	1209319	PF1279	rpl10e	50S ribosomal protein L16
PFDSM3638_06385	1192871	1193266	PF_RS06405	1209542	1209937	PF1280	PFDSM3638_06385	hypothetical protein
PFDSM3638_06390	1193517	1193891	PF_RS06410	1210188	1210562	PF1281	PFDSM3638_06390	superoxide reductase
PFDSM3638_06395	1193902	1194066	PF_RS06415	1210573	1210737	PF1282	PFDSM3638_06395	rubredoxin
PFDSM3638_06400	1194143	1194658	PF_RS06420	1210814	1211329	PF1283	PFDSM3638_06400	rubrerythrin
PFDSM3638_06405	1194763	1194942	PF_RS06425	1211434	1211613	PF1284	PFDSM3638_06405	hypothetical protein
PFDSM3638_06410	1195072	1196163	PF_RS06430	1211743	1212834	PF1285	PFDSM3638_06410	Fe-S cluster assembly protein SufD
PFDSM3638_06415	1196163	1197590	PF_RS06435	1212834	1214261	PF1286	sufB	Fe-S cluster assembly protein SufB
PFDSM3638_06420	1197580	1198311	PF_RS06440	1214251	1214982	PF1287	sufC	Fe-S cluster assembly ATPase SufC
PFDSM3638_06425	1198401	1199492	PF_RS06445	1215072	1216163	PF1288	thiI	tRNA 4-thiouridine(8) synthase ThiI
PFDSM3638_06430	1199495	1200457	PF_RS06450	1216166	1217128	PF1289	PFDSM3638_06430	molybdopterin biosynthesis protein MoeB
PFDSM3638_06435	1200547	1201116	PF_RS06455	1217218	1217787	PF1290	PFDSM3638_06435	DUF523 domain-containing protein
PFDSM3638_06440	1201179	1201937	PF_RS06460	1217850	1218608	PF1291	PFDSM3638_06440	metallophosphatase family protein
PFDSM3638_06445	1201906	1203198	PF_RS06465	1218577	1219869	PF1292	PFDSM3638_06445	hypothetical protein
PFDSM3638_06450	1203266	1204705	PF_RS06470	1219937	1221376	PF1293	PFDSM3638_06450	proline--tRNA ligase
PFDSM3638_06455	1204721	1205281	PF_RS06475	1221392	1221952	PF1294	PFDSM3638_06455	dephospho-CoA kinase
PFDSM3638_06460	1205330	1205905	PF_RS06480	1222001	1222576	PF1295	PFDSM3638_06460	TATA-box-binding protein
PFDSM3638_06465	1205910	1206734	PF_RS06485	1222581	1223405	PF1296	folP	dihydropteroate synthase
PFDSM3638_06470	1206724	1207131	PF_RS06490	1223395	1223802	PF1297	PFDSM3638_06470	hypothetical protein
PFDSM3638_06475	1207170	1207679	PF_RS06495	1223841	1224350	PF1298	PFDSM3638_06475	endonuclease
PFDSM3638_06480	1207676	1208302	PF_RS06500	1224347	1224973	PF1299	pcp	pyroglutamyl-peptidase I
PFDSM3638_06485	1208299	1208553	PF_RS06505	1224970	1225224	PF1300	PFDSM3638_06485	hypothetical protein
PFDSM3638_06490	1208553	1209239	PF_RS06510	1225224	1225910	PF1301	PFDSM3638_06490	MBL fold metallo-hydrolase
PFDSM3638_06495	1209489	1209896	PF_RS06515	1226160	1226567	PF1302	PFDSM3638_06495	hypothetical protein
PFDSM3638_06500	1209965	1210672	PF_RS06520	1226636	1227343	PF1303	PFDSM3638_06500	DUF2101 domain-containing protein
PFDSM3638_06505	1210682	1213168	PF_RS06525	1227353	1229839	PF1304	PFDSM3638_06505	DUF2341 domain-containing protein
PFDSM3638_06510	1213168	1215333	PF_RS06530	1229839	1232004	PF1305	PFDSM3638_06510	hypothetical protein
PFDSM3638_06515	1215330	1216784	PF_RS06535	1232001	1233455	PF1306	PFDSM3638_06515	hypothetical protein
PFDSM3638_06520	1216830	1217249	PF_RS06540	1233501	1233920	PF1307	PFDSM3638_06520	hypothetical protein
PFDSM3638_06525	1217366	1217569	PF_RS06545	1234037	1234240	PF1308	PFDSM3638_06525	antitoxin
PFDSM3638_06530	1218303	1218572	PF_RS06550	1234974	1235243	PF1308.2n	PFDSM3638_06530	hypothetical protein
PFDSM3638_06535	1218643	1220133	PF_RS06555	1235314	1236804	PF1310	PFDSM3638_06535	hypothetical protein
PFDSM3638_06540	1220281	1220664	PF_RS06560	1236960	1237334	PF1311	PFDSM3638_06540	hypothetical protein
PFDSM3638_06545	1220687	1221394	PF_RS06565	1237357	1238064	PF1312	PFDSM3638_06545	hypothetical protein
PFDSM3638_06550	1221396	1222049	PF_RS06570	1238066	1238719	PF1313	dprA	DNA-protecting protein DprA
PFDSM3638_06555	1222254	1222811	PF_RS06575	1238924	1239481	PF1314	PFDSM3638_06555	NYN domain-containing protein
PFDSM3638_06560	1222869	1223126	PF_RS06580	1239539	1239796	PF1315	PFDSM3638_06560	DUF262 domain-containing protein
PFDSM3638_06565	1223142	1224512	PF_RS06585	1239812	1241182	PF1316	PFDSM3638_06565	hypothetical protein
PFDSM3638_06570	1224524	1225490	PF_RS06590	1241194	1242160	-	PFDSM3638_06570	class II glutamine amidotransferase
PFDSM3638_06575	1225487	1225769	PF_RS06595	1242157	1242439	-	PFDSM3638_06575	gamma-glutamylcyclotransferase
PFDSM3638_06580	1225830	1226018	PF_RS06600	1242500	1242688	PF1320.1n	PFDSM3638_06580	hypothetical protein
PFDSM3638_06585	1226216	1227622	PF_RS06605	1242886	1244292	PF1321	PFDSM3638_06585	ATPase
PFDSM3638_06590	1227905	1228135	PF_RS06610	1244575	1244805	PF1322	PFDSM3638_06590	type II toxin-antitoxin system HicB family antitoxin
PFDSM3638_06595	1228132	1228359	PF_RS06615	1244802	1245029	PF1323	PFDSM3638_06595	addiction module toxin, HicA family
PFDSM3638_06600	1228832	1229305	PF_RS06620	1245503	1245976	PF1324	PFDSM3638_06600	hypothetical protein
PFDSM3638_06605	1229311	1230399	PF_RS06625	1245982	1247070	PF1325	PFDSM3638_06605	rubrerythrin family protein
PFDSM3638_06610	1230396	1230896	PF_RS06630	1247067	1247567	PF1326	PFDSM3638_06610	hypothetical protein
PFDSM3638_06615	1230930	1232354	PF_RS06635	1247601	1249025	PF1327	gltA	glutamate synthase (NADPH), homotetrameric
PFDSM3638_06620	1232355	1233191	PF_RS06640	1249026	1249862	PF1328	PFDSM3638_06620	ferredoxin-NADP reductase
PFDSM3638_06625	1233350	1234354	PF_RS06645	1250021	1251025	PF1329	PFDSM3638_06625	hydrogenase
PFDSM3638_06630	1234351	1235217	PF_RS06650	1251022	1251888	PF1330	PFDSM3638_06630	cytochrome-c3 hydrogenase subunit gamma
PFDSM3638_06635	1235217	1235930	PF_RS06655	1251888	1252601	PF1331	PFDSM3638_06635	hydrogenase
PFDSM3638_06640	1235933	1237171	PF_RS06660	1252604	1253842	PF1332	PFDSM3638_06640	hydrogenase
PFDSM3638_06645	1237168	1238523	PF_RS06665	1253839	1255194	PF1333	thiD	bifunctional hydroxymethylpyrimidine kinase/phosphomethylpyrimidine kinase
PFDSM3638_06650	1238520	1239143	PF_RS06670	1255191	1255814	PF1334	thiE	thiamine phosphate synthase
PFDSM3638_06655	1239140	1239937	PF_RS06675	1255811	1256608	PF1335	PFDSM3638_06655	hydroxyethylthiazole kinase
PFDSM3638_06660	1239934	1241187	PF_RS06680	1256605	1257858	PF1336	PFDSM3638_06660	putative hydroxymethylpyrimidine transporter CytX
PFDSM3638_06665	1241180	1241818	PF_RS06685	1257851	1258489	PF1337	PFDSM3638_06665	transcriptional regulator
PFDSM3638_06670	1241808	1242452	PF_RS06690	1258479	1259123	PF1338	tenA	thiaminase II
PFDSM3638_06675	1242545	1243216	PF_RS06695	1259216	1259887	PF1339	PFDSM3638_06675	hypothetical protein
PFDSM3638_06680	1243213	1243878	PF_RS06700	1259884	1260549	PF1340	PFDSM3638_06680	hypothetical protein
PFDSM3638_06685	1243975	1245171	PF_RS06705	1260646	1261842	PF1341	gcvT	glycine cleavage system protein T
PFDSM3638_06690	1245296	1245838	PF_RS06710	1261967	1262509	PF1342	PFDSM3638_06690	hypothetical protein
PFDSM3638_06695	1245830	1246876	PF_RS06715	1262501	1263547	PF1343	PFDSM3638_06695	peptidase M24
PFDSM3638_06700	1247012	1247722	PF_RS06720	1263683	1264393	PF1344	PFDSM3638_06700	maleate cis-trans isomerase
PFDSM3638_06705	1247722	1248645	PF_RS06725	1264393	1265316	PF1345	PFDSM3638_06705	ribonuclease Z
PFDSM3638_06710	1248623	1249291	PF_RS06730	1265294	1265962	PF1346	PFDSM3638_06710	conjugal transfer protein TraB
PFDSM3638_06715	1249255	1249521	PF_RS06735	1265926	1266192	PF1347	PFDSM3638_06715	hypothetical protein
PFDSM3638_06720	1249606	1249812	PF_RS06740	1266277	1266483	PF1348	PFDSM3638_06720	hypothetical protein
PFDSM3638_06725	1249948	1251018	PF_RS06745	1266619	1267689	PF1349	PFDSM3638_06725	S-methyl-5-thioribose-1-phosphate isomerase
PFDSM3638_06730	1251125	1252411	PF_RS06750	1267796	1269082	PF1350	PFDSM3638_06730	MFS transporter
PFDSM3638_06735	1252354	1254231	PF_RS06755	1269025	1270902	PF1351	PFDSM3638_06735	threonine--tRNA ligase
PFDSM3638_06740	1254303	1254707	PF_RS06760	1270974	1271378	PF1352	PFDSM3638_06740	PIN domain-containing protein
PFDSM3638_06745	1254694	1254915	PF_RS06765	1271365	1271586	PF1353	PFDSM3638_06745	hypothetical protein
PFDSM3638_06750	1255139	1256395	PF_RS06770	1271810	1273066	PF1354	PFDSM3638_06750	flippase
PFDSM3638_06755	1256405	1257688	PF_RS06775	1273076	1274359	PF1355	PFDSM3638_06755	UDP-glucose/GDP-mannose dehydrogenase family protein
PFDSM3638_06760	1257685	1258536	PF_RS06780	1274356	1275207	PF1356	PFDSM3638_06760	UTP--glucose-1-phosphate uridylyltransferase
PFDSM3638_06765	1258533	1259543	PF_RS06785	1275204	1276214	PF1357	PFDSM3638_06765	NAD-dependent epimerase/dehydratase family protein
PFDSM3638_06770	1259544	1259777	PF_RS06790	1276215	1276448	PF1357.1n	PFDSM3638_06770	hypothetical protein
PFDSM3638_06775	1259787	1260695	PF_RS06795	1276458	1277366	PF1358	PFDSM3638_06775	glycosyltransferase family 1 protein
PFDSM3638_06780	1260719	1261624	PF_RS06800	1277390	1278295	PF1359	PFDSM3638_06780	glycosyl transferase
PFDSM3638_06785	1261621	1262718	PF_RS06805	1278292	1279389	PF1360	PFDSM3638_06785	group 1 glycosyl transferase
PFDSM3638_06790	1262708	1263859	PF_RS06810	1279379	1280530	PF1361	PFDSM3638_06790	glycosyltransferase family 4 protein
PFDSM3638_06795	1263868	1265106	PF_RS06815	1280539	1281777	PF1362	PFDSM3638_06795	group 1 glycosyl transferase
PFDSM3638_06800	1265084	1266052	PF_RS06820	1281755	1282723	PF1363	PFDSM3638_06800	glycosyl transferase
PFDSM3638_06805	1266049	1267170	PF_RS06825	1282720	1283841	PF1364	PFDSM3638_06805	glycosyltransferase family 1 protein
PFDSM3638_06810	1267284	1267639	PF_RS06830	1283955	1284310	PF1365	PFDSM3638_06810	hypothetical protein
PFDSM3638_06815	1267646	1268347	PF_RS06835	1284317	1285018	PF1366	PFDSM3638_06815	IS6 family transposase ISPfu1
PFDSM3638_06820	1268501	1268872	PF_RS06840	1285172	1285543	PF1367	rpl7ae	50S ribosomal protein L7ae
PFDSM3638_06825	1268919	1269134	PF_RS06845	1285590	1285805	PF1368	PFDSM3638_06825	30S ribosomal protein S28e
PFDSM3638_06830	1269140	1269340	PF_RS06850	1285811	1286011	PF1369	PFDSM3638_06830	50S ribosomal protein L24
PFDSM3638_06835	1269535	1269756	PF_RS06855	1286206	1286427	PF1370	PFDSM3638_06835	transporter
PFDSM3638_06840	1269791	1270621	PF_RS06860	1286462	1287292	PF1371	PFDSM3638_06840	EamA family transporter
PFDSM3638_06855	1271128	1271361	PF_RS06875	1287799	1288032	PF1372	PFDSM3638_06855	hypothetical protein
PFDSM3638_06865	1271601	1272455	PF_RS06880	1288272	1289126	PF1373	PFDSM3638_06865	cation transporter
PFDSM3638_06870	1272457	1273206	PF_RS06885	1289128	1289877	PF1374	PFDSM3638_06870	lipoate--protein ligase family protein
PFDSM3638_06875	1273477	1274763	PF_RS06890	1290148	1291434	PF1375	tuf	translation elongation factor EF-1 subunit alpha
PFDSM3638_06880	1274803	1275111	PF_RS06895	1291474	1291782	PF1376	rpsJ	30S ribosomal protein S10
PFDSM3638_06890	1275327	1276229	PF_RS06905	1291998	1292900	PF1377	tfb	transcription initiation factor IIB
PFDSM3638_06895	1276377	1276739	PF_RS06910	1293048	1293410	PF1378	PFDSM3638_06895	ribonuclease P protein component 2
PFDSM3638_06900	1276745	1277815	PF_RS06915	1293416	1294486	PF1379	PFDSM3638_06900	mRNA surveillance protein pelota
PFDSM3638_06905	1277826	1279715	PF_RS06920	1294497	1296386	PF1380	PFDSM3638_06905	arginine--tRNA ligase
PFDSM3638_06910	1279720	1280154	PF_RS06925	1296391	1296825	PF1381	PFDSM3638_06910	hypothetical protein
PFDSM3638_06915	1280168	1281208	PF_RS06930	1296839	1297879	PF1382	PFDSM3638_06915	NAD(P)-dependent glycerol-1-phosphate dehydrogenase
PFDSM3638_06925	1281448	1282251	PF_RS06940	1298119	1298922	PF1383	PFDSM3638_06925	sugar phosphate isomerase/epimerase
PFDSM3638_06930	1282257	1282631	PF_RS06945	1298928	1299302	PF1384	PFDSM3638_06930	hypothetical protein
PFDSM3638_06935	1282632	1283222	PF_RS06950	1299303	1299893	PF1385	PFDSM3638_06935	uracil-DNA glycosylase
PFDSM3638_06940	1283267	1283986	PF_RS06955	1299938	1300657	PF1386	PFDSM3638_06940	transcriptional regulator
PFDSM3638_06945	1283983	1284768	PF_RS06960	1300654	1301439	PF1387	PFDSM3638_06945	phosphopantothenate/pantothenate synthetase
PFDSM3638_06950	1284829	1285260	PF_RS06965	1301500	1301931	PF1388	PFDSM3638_06950	osmotically inducible protein OsmC
PFDSM3638_06955	1285330	1286166	PF_RS06970	1302001	1302837	PF1389	PFDSM3638_06955	radical SAM protein
PFDSM3638_06960	1286152	1286985	PF_RS06975	1302823	1303656	PF1390	PFDSM3638_06960	hypothetical protein
PFDSM3638_06965	1287070	1287507	PF_RS06980	1303741	1304178	PF1391	PFDSM3638_06965	hypothetical protein
PFDSM3638_06970	1287507	1289456	PF_RS06985	1304178	1306127	PF1392	PFDSM3638_06970	hypothetical protein
PFDSM3638_06975	1289640	1291538	PF_RS06990	1306311	1308209	PF1393	PFDSM3638_06975	DUF1957 domain-containing protein
PFDSM3638_06980	1291521	1292441	PF_RS06995	1308192	1309112	PF1394	PFDSM3638_06980	3-phosphoglycerate dehydrogenase
PFDSM3638_06985	1292447	1293085	PF_RS07000	1309118	1309756	PF1395	PFDSM3638_06985	TIGR00153 family protein
PFDSM3638_06990	1293063	1293989	PF_RS07005	1309734	1310660	PF1396	PFDSM3638_06990	2-dehydropantoate 2-reductase
PFDSM3638_06995	1294053	1295099	PF_RS07010	1310724	1311770	PF1397	amrS	AmmeMemoRadiSam system radical SAM enzyme
PFDSM3638_07000	1295101	1295904	PF_RS07015	1311772	1312575	PF1398	PFDSM3638_07000	hypothetical protein
PFDSM3638_07005	1296092	1297909	PF_RS07020	1312763	1314580	PF1399	PFDSM3638_07005	S-layer protein
PFDSM3638_07010	1297954	1298694	PF_RS07025	1314625	1315365	PF1400	PFDSM3638_07010	hypothetical protein
PFDSM3638_07015	1298740	1299516	PF_RS07030	1315411	1316187	PF1401	PFDSM3638_07015	peptidylprolyl isomerase
PFDSM3638_07020	1299549	1300445	PF_RS07035	1316220	1317116	PF1402	PFDSM3638_07020	hypothetical protein
PFDSM3638_07025	1300460	1301068	PF_RS07040	1317131	1317739	PF1403	PFDSM3638_07025	tRNA (pseudouridine(54)-N(1))-methyltransferase TrmY
PFDSM3638_07030	1301157	1301777	PF_RS07045	1317828	1318448	PF1404	psmB	proteasome endopeptidase complex, archaeal, beta subunit
PFDSM3638_07035	1301796	1303742	PF_RS07050	1318467	1320413	PF1405	PFDSM3638_07035	beta-CASP ribonuclease aCPSF1
PFDSM3638_07040	1303747	1305084	PF_RS07055	1320418	1321755	PF1406	thrC	threonine synthase
PFDSM3638_07045	1305118	1305795	PF_RS07060	1321789	1322466	PF1407	PFDSM3638_07045	UMP kinase
PFDSM3638_07050	1306036	1308153	PF_RS07065	1322707	1324824	PF1408	PFDSM3638_07050	DNA-binding protein
PFDSM3638_07055	1308272	1309270	PF_RS07070	1324943	1325941	PF1409	PFDSM3638_07055	ABC transporter permease
PFDSM3638_07060	1309282	1310433	PF_RS07075	1325953	1327104	PF1410	PFDSM3638_07060	ABC transporter permease
PFDSM3638_07065	1310426	1311406	PF_RS07080	1327097	1328077	PF1411	PFDSM3638_07065	ABC transporter ATP-binding protein
PFDSM3638_07070	1311417	1312406	PF_RS07085	1328088	1329077	PF1412	PFDSM3638_07070	ABC transporter ATP-binding protein
PFDSM3638_07075	1312431	1312820	PF_RS07090	1329102	1329491	PF1413	PFDSM3638_07075	hypothetical protein
PFDSM3638_07085	1312908	1313930	PF_RS07095	1329579	1330601	PF1414	PFDSM3638_07085	flap endonuclease-1
PFDSM3638_07090	1313920	1314915	PF_RS07100	1330591	1331586	PF1415	PFDSM3638_07090	class I SAM-dependent methyltransferase family protein
PFDSM3638_07095	1314930	1315346	PF_RS07105	1331601	1332017	PF1416	PFDSM3638_07095	hypothetical protein
PFDSM3638_07100	1315638	1316492	PF_RS07110	1332309	1333163	PF1418	PFDSM3638_07100	hypothetical protein
PFDSM3638_07105	1316707	1317402	PF_RS07115	1333376	1334071	PF1419	PFDSM3638_07105	phosphoglycolate phosphatase
PFDSM3638_07110	1318053	1319417	PF_RS07120	1334722	1336086	PF1421	PFDSM3638_07110	aspartate aminotransferase family protein
PFDSM3638_07115	1319525	1320517	PF_RS07125	1336194	1337186	PF1422	trxB	thioredoxin-disulfide reductase
PFDSM3638_07120	1320744	1321247	PF_RS07130	1337413	1337916	PF1423	PFDSM3638_07120	cation:proton antiporter
PFDSM3638_07125	1321244	1321498	PF_RS07135	1337913	1338167	PF1424	PFDSM3638_07125	cation:proton antiporter
PFDSM3638_07130	1321495	1321869	PF_RS07140	1338164	1338538	PF1425	PFDSM3638_07130	cation:proton antiporter
PFDSM3638_07135	1321850	1322116	PF_RS07145	1338528	1338785	PF1426	PFDSM3638_07135	hypothetical protein
PFDSM3638_07140	1322113	1322412	PF_RS07150	1338782	1339081	PF1427	PFDSM3638_07140	hypothetical protein
PFDSM3638_07145	1322405	1322851	PF_RS07155	1339074	1339520	PF1428	PFDSM3638_07145	cation:proton antiporter
PFDSM3638_07150	1322848	1323201	PF_RS07160	1339517	1339870	PF1429	PFDSM3638_07150	cation:proton antiporter
PFDSM3638_07155	1323198	1324730	PF_RS07165	1339867	1341399	PF1430	PFDSM3638_07155	cation:proton antiporter
PFDSM3638_07160	1324732	1325079	PF_RS07170	1341401	1341748	PF1431	PFDSM3638_07160	hydrogenase
PFDSM3638_07165	1325084	1325587	PF_RS07175	1341753	1342256	PF1432	PFDSM3638_07165	hydrogenase
PFDSM3638_07170	1325580	1326101	PF_RS07180	1342249	1342770	PF1433	PFDSM3638_07170	hydrogenase
PFDSM3638_07175	1326098	1327381	PF_RS07185	1342767	1344050	PF1434	PFDSM3638_07175	NADH dehydrogenase subunit
PFDSM3638_07180	1327384	1328349	PF_RS07190	1344053	1345018	PF1435	PFDSM3638_07180	CO-induced hydrogenase subunit K
PFDSM3638_07185	1328346	1328765	PF_RS07195	1345015	1345434	PF1436	PFDSM3638_07185	NADH-plastoquinone oxidoreductase subunit
PFDSM3638_07195	1328877	1330181	PF_RS07200	1345546	1346850	PF1437	PFDSM3638_07195	hypothetical protein
PFDSM3638_07200	1330152	1332056	PF_RS07205	1346821	1348725	PF1438	PFDSM3638_07200	CGP-CTERM sorting domain-containing protein
PFDSM3638_07205	1332110	1332448	PF_RS07210	1348779	1349117	PF1439	PFDSM3638_07205	DUF4870 domain-containing protein
PFDSM3638_07210	1332522	1333730	PF_RS07215	1349191	1350399	PF1440	coaBC	bifunctional phosphopantothenoylcysteine decarboxylase/phosphopantothenate--cysteine ligase CoaBC
PFDSM3638_07215	1333719	1334345	PF_RS07220	1350388	1351014	PF1441	PFDSM3638_07215	NADH-quinone oxidoreductase subunit NuoI
PFDSM3638_07220	1334351	1335526	PF_RS07225	1351020	1352195	PF1442	PFDSM3638_07220	NADH-quinone oxidoreductase subunit NuoD
PFDSM3638_07225	1335537	1336061	PF_RS07230	1352206	1352730	PF1443	PFDSM3638_07225	NADH-quinone oxidoreductase subunit C
PFDSM3638_07230	1336058	1336636	PF_RS07235	1352727	1353305	PF1444	PFDSM3638_07230	NADH-quinone oxidoreductase subunit B
PFDSM3638_07235	1336647	1337576	PF_RS07240	1353316	1354245	PF1445	PFDSM3638_07235	NADH dehydrogenase subunit
PFDSM3638_07240	1337580	1339436	PF_RS07245	1354249	1356105	PF1446	PFDSM3638_07240	NADH-quinone oxidoreductase subunit M
PFDSM3638_07245	1339433	1340914	PF_RS07250	1356102	1357583	PF1447	PFDSM3638_07245	proton-conducting membrane transporter
PFDSM3638_07250	1340911	1341255	PF_RS07255	1357580	1357924	PF1448	PFDSM3638_07250	cation:proton antiporter
PFDSM3638_07255	1341252	1341959	PF_RS07260	1357921	1358628	PF1449	PFDSM3638_07255	cation:proton antiporter
PFDSM3638_07260	1341962	1342246	PF_RS07265	1358631	1358915	PF1450	PFDSM3638_07260	hypothetical protein
PFDSM3638_07265	1342243	1342617	PF_RS07270	1358912	1359286	PF1451	PFDSM3638_07265	Na+/H+ antiporter subunit G
PFDSM3638_07270	1342614	1342868	PF_RS07275	1359283	1359537	PF1452	PFDSM3638_07270	cation:proton antiporter
PFDSM3638_07275	1342865	1343371	PF_RS07280	1359534	1360040	PF1453	PFDSM3638_07275	Na+/H+ antiporter subunit E
PFDSM3638_07280	1343577	1345343	PF_RS07285	1360246	1362012	PF1454	PFDSM3638_07280	radical SAM protein
PFDSM3638_07285	1345353	1345619	PF_RS07290	1362022	1362288	PF1455	PFDSM3638_07285	DUF3213 domain-containing protein
PFDSM3638_07290	1345656	1346186	PF_RS07295	1362325	1362855	PF1456	PFDSM3638_07290	N-acetyltransferase
PFDSM3638_07295	1346246	1346590	PF_RS07300	1362915	1363259	PF1457	PFDSM3638_07295	glutaredoxin
PFDSM3638_07300	1346571	1347506	PF_RS07305	1363240	1364175	PF1458	PFDSM3638_07300	carbohydrate kinase
PFDSM3638_07305	1347581	1349032	PF_RS07310	1364250	1365701	PF1459	PFDSM3638_07305	fucose isomerase
PFDSM3638_07310	1349010	1350743	PF_RS07315	1365679	1367412	PF1460	PFDSM3638_07310	glycogen debranching protein
PFDSM3638_07315	1350805	1352121	PF_RS07320	1367474	1368790	PF1461	gatD	Glu-tRNA(Gln) amidotransferase GatDE subunit D
PFDSM3638_07320	1352249	1352407	PF_RS10720	1368918	1369076	-	PFDSM3638_07320	DUF104 domain-containing protein
PFDSM3638_07325	1352460	1354346	PF_RS07325	1369129	1371015	PF1462	PFDSM3638_07325	Glu-tRNA(Gln) amidotransferase GatDE subunit E
PFDSM3638_07330	1354509	1355042	PF_RS07330	1371178	1371711	PF1463	PFDSM3638_07330	hypothetical protein
PFDSM3638_07335	1355039	1355860	PF_RS07335	1371708	1372529	PF1464	PFDSM3638_07335	hypothetical protein
PFDSM3638_07340	1355839	1356633	PF_RS07340	1372508	1373302	PF1465	PFDSM3638_07340	hypothetical protein
PFDSM3638_07345	1356522	1357022	PF_RS07345	1373191	1373691	PF1466	PFDSM3638_07345	hypothetical protein
PFDSM3638_07350	1356997	1357512	PF_RS07350	1373666	1374181	PF1467	PFDSM3638_07350	ABC transporter ATP-binding protein
PFDSM3638_07365	1358036	1359316	PF_RS07360	1374705	1375985	PF1469	PFDSM3638_07365	dicarboxylate/amino acid:cation symporter
PFDSM3638_07370	1359267	1360445	PF_RS07365	1375936	1377114	PF1470	PFDSM3638_07370	radical SAM protein
PFDSM3638_07375	1360508	1361089	PF_RS07370	1377177	1377758	PF1471	PFDSM3638_07375	ATPase
PFDSM3638_07380	1361086	1362237	PF_RS07375	1377755	1378906	PF1472	PFDSM3638_07380	alanine--glyoxylate aminotransferase family protein
PFDSM3638_07385	1362257	1362952	PF_RS07380	1378926	1379621	PF1473	PFDSM3638_07385	serine/threonine protein kinase
PFDSM3638_07390	1362935	1363231	PF_RS07385	1379604	1379900	PF1474	PFDSM3638_07390	hypothetical protein
PFDSM3638_07395	1363296	1363451	PF_RS07390	1379965	1380120	PF1475	PFDSM3638_07395	50S ribosomal protein L40e
PFDSM3638_07400	1363452	1363778	PF_RS07395	1380121	1380447	PF1476	PFDSM3638_07400	PadR family transcriptional regulator
PFDSM3638_07405	1363903	1365591	PF_RS07400	1380572	1382260	PF1477	PFDSM3638_07405	methylmalonyl-CoA mutase
PFDSM3638_07410	1365738	1365968	PF_RS07405	1382407	1382637	PF1478	PFDSM3638_07410	hypothetical protein
PFDSM3638_07415	1366250	1366771	PF_RS07410	1382919	1383440	PF1479	PFDSM3638_07415	oxidoreductase
PFDSM3638_07420	1366782	1368656	PF_RS07415	1383451	1385323	PF1480	PFDSM3638_07420	aldehyde ferredoxin oxidoreductase
PFDSM3638_07425	1368729	1369160	PF_RS07420	1385396	1385827	PF1481	PFDSM3638_07425	osmotically inducible protein C
PFDSM3638_07430	1369194	1369415	PF_RS07425	1385861	1386082	PF1482	PFDSM3638_07430	MoaD/ThiS family protein
PFDSM3638_07435	1369507	1369716	PF_RS10735	1386174	1386383	-	PFDSM3638_07435	SAM-dependent methyltransferase
PFDSM3638_07440	1369816	1370544	PF_RS07430	1386483	1387211	PF1483	PFDSM3638_07440	hypothetical protein
PFDSM3638_07450	1370714	1371403	PF_RS07440	1387381	1388070	PF1484	PFDSM3638_07450	metallophosphoesterase
PFDSM3638_07460	1371621	1371908	PF_RS07450	1388279	1388575	PF1485	PFDSM3638_07460	hypothetical protein
PFDSM3638_07465	1371919	1372311	PF_RS07455	1388586	1388978	PF1486	PFDSM3638_07465	hypothetical protein
PFDSM3638_07470	1372302	1373225	PF_RS07460	1388969	1389892	PF1487	PFDSM3638_07470	tRNA 4-thiouridine(8) synthase ThiI
PFDSM3638_07475	1373315	1373983	PF_RS07465	1389982	1390650	PF1488	PFDSM3638_07475	TIGR00703 family protein
PFDSM3638_07480	1374029	1374571	PF_RS07470	1390696	1391238	PF1489	PFDSM3638_07480	hypothetical protein
PFDSM3638_07485	1374557	1375204	PF_RS07475	1391224	1391871	PF1490	PFDSM3638_07485	hypothetical protein
PFDSM3638_07490	1375284	1375487	PF_RS07480	1391951	1392154	PF1491	PFDSM3638_07490	30S ribosomal protein S17e
PFDSM3638_07495	1375484	1375888	PF_RS07485	1392151	1392555	PF1492	gcvH	glycine cleavage system protein H
PFDSM3638_07500	1375952	1376413	PF_RS07490	1392619	1393080	PF1493	PFDSM3638_07500	metal-binding protein
PFDSM3638_07505	1376504	1377067	PF_RS07495	1393171	1393731	PF1494	PFDSM3638_07505	DUF996 domain-containing protein
PFDSM3638_07510	1377041	1378114	PF_RS07500	1393705	1394778	PF1495	PFDSM3638_07510	hypothetical protein
PFDSM3638_07515	1378129	1379145	PF_RS07505	1394793	1395809	PF1496	PFDSM3638_07515	hypothetical protein
PFDSM3638_07520	1379217	1380413	PF_RS07510	1395881	1397077	PF1497	PFDSM3638_07520	alanine aminotransferase
PFDSM3638_07540	1381127	1381546	PF_RS07530	1397791	1398210	PF1498	PFDSM3638_07540	RNA-binding protein
PFDSM3638_07545	1381550	1382002	PF_RS07535	1398214	1398666	PF1499	PFDSM3638_07545	30S ribosomal protein S19e
PFDSM3638_07550	1382067	1382345	PF_RS07540	1398731	1399009	PF1500	PFDSM3638_07550	photosystem reaction center subunit H
PFDSM3638_07555	1382342	1382953	PF_RS07545	1399006	1399617	PF1501	PFDSM3638_07555	DUF447 domain-containing protein
PFDSM3638_07560	1382933	1384495	PF_RS07550	1399597	1401159	PF1502	PFDSM3638_07560	hypothetical protein
PFDSM3638_07565	1384492	1384827	PF_RS07555	1401156	1401491	PF1503	PFDSM3638_07565	Holliday junction resolvase
PFDSM3638_07570	1384730	1387672	PF_RS07560	1401394	1404336	PF1504	PFDSM3638_07570	large helicase
PFDSM3638_07575	1387746	1389842	PF_RS07565	1404410	1406506	PF1505	PFDSM3638_07575	DNA cytosine methyltransferase
PFDSM3638_07580	1389935	1392031	PF_RS07570	1406599	1408695	PF1506	PFDSM3638_07580	hypothetical protein
PFDSM3638_07585	1392045	1393145	PF_RS07575	1408709	1409809	PF1507	PFDSM3638_07585	cell division protein FtsZ
PFDSM3638_07590	1393132	1393725	PF_RS07580	1409796	1410389	PF1508	PFDSM3638_07590	hypothetical protein
PFDSM3638_07595	1393773	1394354	PF_RS07585	1410437	1411018	PF1509	PFDSM3638_07595	class III signal peptide-containing protein
PFDSM3638_07600	1394362	1394799	PF_RS07590	1411026	1411463	PF1510	PFDSM3638_07600	hypothetical protein
PFDSM3638_07605	1394804	1395205	PF_RS07595	1411468	1411869	PF1511	PFDSM3638_07605	hypothetical protein
PFDSM3638_07610	1395202	1395480	PF_RS07600	1411866	1412144	PF1512	PFDSM3638_07610	hypothetical protein
PFDSM3638_07615	1395606	1396082	PF_RS07605	1412270	1412746	PF1513	PFDSM3638_07615	hypothetical protein
PFDSM3638_07620	1396091	1396705	PF_RS07610	1412755	1413369	PF1514	PFDSM3638_07620	hypothetical protein
PFDSM3638_07630	1396791	1397357	PF_RS07615	1413455	1414021	PF1515	PFDSM3638_07630	GMP synthase
PFDSM3638_07635	1397367	1398290	PF_RS07620	1414031	1414954	PF1516	PFDSM3638_07635	glutamine-hydrolyzing GMP synthase
PFDSM3638_07640	1398410	1399414	PF_RS07625	1415074	1416078	PF1517	PFDSM3638_07640	5-formaminoimidazole-4-carboxamide-1-(beta)-D- ribofuranosyl 5'-monophosphate synthetase
PFDSM3638_07645	1399526	1400566	PF_RS07630	1416190	1417230	PF1518	PFDSM3638_07645	thiamine ABC transporter substrate-binding protein
PFDSM3638_07650	1400553	1401548	PF_RS07635	1417217	1418212	PF1519	PFDSM3638_07650	ABC transporter ATP-binding protein
PFDSM3638_07655	1401542	1403107	PF_RS07640	1418206	1419771	PF1520	PFDSM3638_07655	iron ABC transporter permease
PFDSM3638_07660	1403130	1405133	PF_RS07645	1419794	1421797	PF1521	PFDSM3638_07660	formate dehydrogenase subunit alpha
PFDSM3638_07665	1405188	1405961	PF_RS07650	1421852	1422625	PF1522	PFDSM3638_07665	ABC transporter ATP-binding protein
PFDSM3638_07670	1405933	1406334	PF_RS07655	1422597	1422998	PF1523	PFDSM3638_07670	hypothetical protein
PFDSM3638_07675	1406343	1407134	PF_RS07660	1423007	1423798	PF1524	PFDSM3638_07675	hypothetical protein
PFDSM3638_07680	1407627	1407935	PF_RS07665	1424291	1424599	PF1525	PFDSM3638_07680	hypothetical protein
PFDSM3638_07685	1407940	1408134	PF_RS07670	1424604	1424798	PF1526	PFDSM3638_07685	hypothetical protein
PFDSM3638_07690	1408112	1408513	PF_RS07675	1424776	1425177	PF1527	PFDSM3638_07690	hypothetical protein
PFDSM3638_07695	1408639	1409232	PF_RS07680	1425303	1425896	PF1528	pdxT	pyridoxal 5'-phosphate synthase glutaminase subunit PdxT
PFDSM3638_07700	1409264	1410271	PF_RS07685	1425928	1426935	PF1529	PFDSM3638_07700	pyridoxal 5'-phosphate synthase lyase subunit PdxS
PFDSM3638_07705	1410372	1411130	PF_RS07690	1427036	1427794	PF1530	PFDSM3638_07705	ribose 1,5-bisphosphate isomerase
PFDSM3638_07710	1411259	1412548	PF_RS07695	1427923	1429212	PF1531	PFDSM3638_07710	phosphomethylpyrimidine synthase
PFDSM3638_07715	1412654	1413970	PF_RS07700	1429318	1430634	PF1532	PFDSM3638_07715	NADH oxidase
PFDSM3638_07720	1414095	1415432	PF_RS07705	1430759	1432096	PF1533	PFDSM3638_07720	nodulation protein NfeD
PFDSM3638_07725	1415432	1416241	PF_RS07710	1432096	1432905	PF1534	PFDSM3638_07725	hypothetical protein
PFDSM3638_07730	1416246	1418765	PF_RS07715	1432910	1435429	PF1535	PFDSM3638_07730	DUF3417 domain-containing protein
PFDSM3638_07735	1418768	1419319	PF_RS07720	1435432	1435983	PF1536	PFDSM3638_07735	O-acetyl-ADP-ribose deacetylase
PFDSM3638_07740	1419303	1420250	PF_RS07725	1435967	1436914	PF1537	PFDSM3638_07740	DUF835 domain-containing protein
PFDSM3638_07745	1420250	1421509	PF_RS07730	1436914	1438173	PF1538	PFDSM3638_07745	N-ethylammeline chlorohydrolase
PFDSM3638_07750	1421591	1422493	PF_RS07735	1438255	1439157	PF1539	PFDSM3638_07750	dihydroorotate dehydrogenase
PFDSM3638_07755	1422588	1423976	PF_RS07740	1439252	1440640	PF1540	PFDSM3638_07755	acetyl CoA synthetase
PFDSM3638_07760	1423985	1424173	PF_RS07745	1440649	1440837	PF1541	PFDSM3638_07760	50S ribosomal protein L37e
PFDSM3638_07765	1424185	1424415	PF_RS07750	1440849	1441079	PF1542	PFDSM3638_07765	small nuclear ribonucleoprotein
PFDSM3638_07770	1424669	1425124	PF_RS07755	1441333	1441788	PF1543	PFDSM3638_07770	transcriptional regulator
PFDSM3638_07775	1425142	1426608	PF_RS07760	1441806	1443272	PF1544	PFDSM3638_07775	hypothetical protein
PFDSM3638_07780	1426589	1426924	PF_RS07765	1443253	1443588	PF1545	PFDSM3638_07780	nascent polypeptide-associated complex protein
PFDSM3638_07790	1427457	1427798	PF_RS07775	1444121	1444462	PF1546	PFDSM3638_07790	hypothetical protein
PFDSM3638_07795	1427833	1428879	PF_RS07780	1444497	1445543	PF1547	PFDSM3638_07795	peptidase M42
PFDSM3638_07800	1428989	1430167	PF_RS07785	1445653	1446831	PF1548	PFDSM3638_07800	hypothetical protein
PFDSM3638_07805	1430164	1431192	PF_RS07790	1446828	1447856	PF1549	PFDSM3638_07805	RNA 3'-phosphate cyclase
PFDSM3638_07810	1431204	1431716	PF_RS07795	1447868	1448380	PF1550	PFDSM3638_07810	phosphodiesterase
PFDSM3638_07815	1431713	1432987	PF_RS07800	1448377	1449651	PF1551	PFDSM3638_07815	TIGR00375 family protein
PFDSM3638_07820	1433039	1433467	PF_RS07805	1449703	1450131	PF1552	PFDSM3638_07820	archease
PFDSM3638_07825	1433481	1434416	PF_RS07810	1450145	1451080	PF1553	PFDSM3638_07825	tRNA methyltransferase
PFDSM3638_07830	1434423	1434674	PF_RS07815	1451087	1451338	PF1554	PFDSM3638_07830	hypothetical protein
PFDSM3638_07835	1434671	1435894	PF_RS07820	1451335	1452558	PF1555	PFDSM3638_07835	tRNA pseudouridine(13) synthase TruD
PFDSM3638_07840	1435905	1436264	PF_RS07825	1452569	1452928	PF1556	pth2	aminoacyl-tRNA hydrolase
PFDSM3638_07845	1436277	1437110	PF_RS07830	1452941	1453774	PF1557	PFDSM3638_07845	universal stress protein
PFDSM3638_07850	1437178	1437825	PF_RS07835	1453842	1454489	PF1558	rpsG	30S ribosomal protein S7
PFDSM3638_07855	1437832	1438275	PF_RS07840	1454496	1454939	PF1559	PFDSM3638_07855	30S ribosomal protein S12
PFDSM3638_07860	1438286	1438723	PF_RS07845	1454950	1455387	PF1560	PFDSM3638_07860	NusA-like transcription termination signal-binding factor
PFDSM3638_07865	1438732	1439031	PF_RS07850	1455396	1455695	PF1561	PFDSM3638_07865	50S ribosomal protein L30e
PFDSM3638_07870	1439035	1440228	PF_RS07855	1455699	1456892	PF1562	rpoA2	DNA-directed RNA polymerase subunit A''
PFDSM3638_07875	1440239	1442971	PF_RS07860	1456903	1459635	PF1563	rpoA1	DNA-directed RNA polymerase subunit A'
PFDSM3638_07880	1442975	1446328	PF_RS07865	1459639	1462992	PF1564	rpoB	DNA-directed RNA polymerase subunit B
PFDSM3638_07885	1446349	1446597	PF_RS07870	1463013	1463261	PF1565	PFDSM3638_07885	DNA-directed RNA polymerase subunit H
PFDSM3638_07895	1446827	1447447	PF_RS07880	1463491	1464111	PF1566	PFDSM3638_07895	hypothetical protein
PFDSM3638_07910	1447676	1448509	PF_RS07895	1464340	1465173	PF1567	PFDSM3638_07910	RNA-binding protein
PFDSM3638_07915	1448499	1449251	PF_RS07900	1465163	1465915	PF1568	PFDSM3638_07915	exosome complex exonuclease Rrp41
PFDSM3638_07920	1449226	1450020	PF_RS07905	1465890	1466684	PF1569	PFDSM3638_07920	RNA-binding protein
PFDSM3638_07925	1450017	1450727	PF_RS07910	1466681	1467391	PF1570	PFDSM3638_07925	ribosome assembly factor SBDS
PFDSM3638_07930	1450761	1451543	PF_RS07915	1467425	1468207	PF1571	psmA	proteasome endopeptidase complex, archaeal, alpha subunit
PFDSM3638_07935	1451704	1452204	PF_RS07920	1468368	1468868	PF1572	PFDSM3638_07935	regulator
PFDSM3638_07940	1452312	1453679	PF_RS07925	1468976	1470343	PF1573	PFDSM3638_07940	TldD-like protein
PFDSM3638_07945	1453692	1455020	PF_RS07930	1470356	1471684	PF1574	PFDSM3638_07945	TldD/PmbA family protein
PFDSM3638_07950	1454998	1455591	PF_RS07935	1471662	1472255	PF1575	PFDSM3638_07950	hypothetical protein
PFDSM3638_07955	1455581	1455991	PF_RS07940	1472245	1472655	PF1576	PFDSM3638_07955	DUF1699 domain-containing protein
PFDSM3638_07960	1455996	1457243	PF_RS07945	1472660	1473907	PF1577	PFDSM3638_07960	hypothetical protein
PFDSM3638_07965	1457250	1458398	PF_RS07950	1473914	1475062	PF1578	PFDSM3638_07965	DNA topoisomerase VI
PFDSM3638_07970	1458373	1460079	PF_RS07955	1475037	1476743	PF1579	top6B	DNA topoisomerase VI subunit B
PFDSM3638_07975	1460089	1460754	PF_RS07960	1476753	1477418	PF1580	PFDSM3638_07975	RNA-processing protein
PFDSM3638_07980	1460727	1461527	PF_RS07965	1477391	1478191	PF1581	PFDSM3638_07980	serine protein kinase RIO
PFDSM3638_07985	1461534	1461875	PF_RS07970	1478198	1478539	PF1582	eif1A	translation initiation factor eIF-1A
PFDSM3638_07990	1462026	1463015	PF_RS07975	1478690	1479679	PF1583	sppA	signal peptide peptidase SppA
PFDSM3638_07995	1463021	1463479	PF_RS07980	1479685	1480143	PF1584	PFDSM3638_07995	hypothetical protein
PFDSM3638_08000	1463482	1464507	PF_RS07985	1480146	1481171	PF1585	PFDSM3638_08000	AI-2E family transporter
PFDSM3638_08005	1464467	1465450	PF_RS07990	1481131	1482114	PF1586	PFDSM3638_08005	hydrogenase
PFDSM3638_08010	1465507	1466361	PF_RS07995	1482171	1483025	PF1587	PFDSM3638_08010	DUF89 domain-containing protein
PFDSM3638_08015	1466358	1466981	PF_RS08000	1483022	1483645	PF1588	PFDSM3638_08015	hypothetical protein
PFDSM3638_08020	1467038	1467793	PF_RS08005	1483702	1484457	PF1589	PFDSM3638_08020	hypothetical protein
PFDSM3638_08025	1467852	1468361	PF_RS08010	1484516	1485025	PF1590	PFDSM3638_08025	NUDIX hydrolase
PFDSM3638_08030	1468403	1469239	PF_RS08015	1485067	1485903	PF1591	PFDSM3638_08030	peptide transporter
PFDSM3638_08035	1469367	1470707	PF_RS08020	1486031	1487371	PF1592	PFDSM3638_08035	TrpB-like pyridoxal-phosphate dependent enzyme
PFDSM3638_08040	1470681	1471934	PF_RS08025	1487345	1488598	PF1593	prf1	peptide chain release factor 1
PFDSM3638_08045	1472019	1472882	PF_RS08030	1488683	1489546	PF1594	PFDSM3638_08045	glycosyltransferase family 2 protein
PFDSM3638_08050	1472896	1473255	PF_RS08035	1489560	1489919	PF1595	PFDSM3638_08050	DUF2304 domain-containing protein
PFDSM3638_08055	1473301	1473669	PF_RS08040	1489965	1490333	PF1596	PFDSM3638_08055	CopY family transcriptional regulator
PFDSM3638_08060	1473675	1474466	PF_RS08045	1490339	1491130	PF1597	PFDSM3638_08060	zinc metallopeptidase
PFDSM3638_08065	1474503	1475060	PF_RS08050	1491167	1491724	PF1598	PFDSM3638_08065	dCMP deaminase
PFDSM3638_08070	1475057	1475851	PF_RS08055	1491721	1492515	PF1599	uppS	di-trans,poly-cis-decaprenylcistransferase
PFDSM3638_08075	1475848	1476369	PF_RS08060	1492512	1493033	PF1600	PFDSM3638_08075	gamma carbonic anhydrase family protein
PFDSM3638_08080	1476495	1476920	PF_RS08065	1493159	1493584	PF1601	PFDSM3638_08080	transcriptional regulator
PFDSM3638_08085	1477011	1478273	PF_RS08070	1493675	1494937	PF1602	PFDSM3638_08085	glutamate dehydrogenase
PFDSM3638_08090	1478555	1479838	PF_RS08075	1495219	1496502	PF1603	PFDSM3638_08090	cation:proton antiporter
PFDSM3638_08095	1479838	1480317	PF_RS08080	1496502	1496981	PF1604	PFDSM3638_08095	CBS domain-containing protein
PFDSM3638_08100	1480308	1480547	PF_RS08085	1496972	1497211	PF1605	PFDSM3638_08100	molybdopterin synthase sulfur carrier subunit
PFDSM3638_08105	1480596	1481243	PF_RS08090	1497260	1497907	PF1606	PFDSM3638_08105	glycosyltransferase family 2 protein
PFDSM3638_08110	1481261	1482772	PF_RS08095	1497925	1499436	PF1607	PFDSM3638_08110	AMP phosphorylase
PFDSM3638_08115	1482775	1483173	PF_RS08100	1499439	1499837	PF1608	PFDSM3638_08115	DUF2095 domain-containing protein
PFDSM3638_08120	1483310	1483501	PF_RS08105	1499974	1500165	-	PFDSM3638_08120	hypothetical protein
PFDSM3638_08125	1483706	1484954	PF_RS08110	1500370	1501618	PF1609	PFDSM3638_08125	transposase
PFDSM3638_08130	1485080	1485301	PF_RS10745	1501744	1501965	PF1610	PFDSM3638_08130	hypothetical protein
PFDSM3638_08135	1485528	1486307	PF_RS08115	1502192	1502971	PF1611	PFDSM3638_08135	septum site-determining protein MinD
PFDSM3638_08140	1486307	1486552	PF_RS08120	1502971	1503216	PF1612	PFDSM3638_08140	hypothetical protein
PFDSM3638_08145	1486546	1486791	PF_RS08125	1503210	1503455	PF1612.1n	PFDSM3638_08145	hypothetical protein
PFDSM3638_08150	1486846	1487199	PF_RS08130	1503510	1503863	PF1613	PFDSM3638_08150	ribonuclease P
PFDSM3638_08155	1487192	1488655	PF_RS08135	1503856	1505319	PF1614	PFDSM3638_08155	hypothetical protein
PFDSM3638_08160	1488662	1491487	PF_RS08140	1505326	1508151	PF1615	PFDSM3638_08160	intein-containing tRNA-splicing ligase RtcB
PFDSM3638_08165	1491818	1492969	PF_RS08145	1508482	1509633	PF1616	PFDSM3638_08165	myo-inositol-1-phosphate synthase
PFDSM3638_08170	1493013	1494353	PF_RS08150	1509677	1511017	PF1617	PFDSM3638_08170	DUF2079 domain-containing protein
PFDSM3638_08175	1494379	1495128	PF_RS08155	1511043	1511792	PF1618	PFDSM3638_08175	ATP-binding protein
PFDSM3638_08180	1495244	1495906	PF_RS08160	1511908	1512570	PF1619	PFDSM3638_08180	hypothetical protein
PFDSM3638_08185	1495924	1496214	PF_RS08165	1512589	1512879	PF1620	PFDSM3638_08185	hypothetical protein
PFDSM3638_08190	1496702	1497241	PF_RS08170	1513367	1513906	PF1621	PFDSM3638_08190	hypothetical protein
PFDSM3638_08195	1497498	1498283	PF_RS08175	1514164	1514949	PF1622	PFDSM3638_08195	ATP pyrophosphatase
PFDSM3638_08200	1498267	1498743	PF_RS08180	1514933	1515409	PF1623	PFDSM3638_08200	arginine decarboxylase, pyruvoyl-dependent
PFDSM3638_08205	1498883	1499410	PF_RS08185	1515549	1516076	PF1624	PFDSM3638_08205	DUF998 domain-containing protein
PFDSM3638_08210	1499686	1500084	PF_RS08190	1516352	1516750	PF1625	PFDSM3638_08210	DUF356 domain-containing protein
PFDSM3638_08215	1500076	1500573	PF_RS08195	1516742	1517239	PF1626	PFDSM3638_08215	DUF402 domain-containing protein
PFDSM3638_08220	1500597	1502303	PF_RS08200	1517263	1518969	PF1627	glyS	glycine--tRNA ligase
PFDSM3638_08225	1502367	1503626	PF_RS08205	1519033	1520292	PF1628	PFDSM3638_08225	radical SAM protein
PFDSM3638_08230	1503739	1504431	PF_RS08210	1520405	1521097	PF1629	PFDSM3638_08230	phosphodiesterase
PFDSM3638_08235	1504414	1505556	PF_RS08215	1521080	1522222	PF1630	PFDSM3638_08235	UDP-N-acetylglucosamine 2-epimerase (non-hydrolyzing)
PFDSM3638_08240	1505553	1506809	PF_RS08220	1522219	1523475	PF1631	PFDSM3638_08240	nucleotide sugar dehydrogenase
PFDSM3638_08245	1507054	1508148	PF_RS08225	1523720	1524814	PF1632	PFDSM3638_08245	DUF354 domain-containing protein
PFDSM3638_08250	1508080	1508637	PF_RS08230	1524746	1525303	PF1633	PFDSM3638_08250	sporulation protein
PFDSM3638_08255	1508634	1508915	PF_RS08235	1525300	1525581	PF1634	PFDSM3638_08255	lipoate--protein ligase
PFDSM3638_08260	1509071	1510756	PF_RS08240	1525737	1527422	PF1635	PFDSM3638_08260	DNA ligase
PFDSM3638_08265	1510753	1511523	PF_RS08245	1527419	1528189	PF1636	PFDSM3638_08265	acetylglutamate kinase
PFDSM3638_08270	1511520	1512524	PF_RS08250	1528186	1529190	PF1637	PFDSM3638_08270	mevalonate kinase
PFDSM3638_08275	1512535	1513413	PF_RS08255	1529201	1530079	PF1638	PFDSM3638_08275	hypothetical protein
PFDSM3638_08280	1513461	1514498	PF_RS08260	1530127	1531164	PF1639	PFDSM3638_08280	threonine synthase
PFDSM3638_08285	1514540	1515148	PF_RS08265	1531206	1531814	PF1640	PFDSM3638_08285	30S ribosomal protein S2
PFDSM3638_08290	1515162	1516181	PF_RS08270	1531828	1532847	PF1641	PFDSM3638_08290	hypothetical protein
PFDSM3638_08295	1516188	1516361	PF_RS08275	1532854	1533027	PF1642	PFDSM3638_08295	DNA-directed RNA polymerase subunit K
PFDSM3638_08305	1516489	1516686	PF_RS08285	1533155	1533352	PF1643	PFDSM3638_08305	DNA-directed RNA polymerase subunit N
PFDSM3638_08310	1516746	1517153	PF_RS08290	1533412	1533819	PF1644	PFDSM3638_08310	30S ribosomal protein S9
PFDSM3638_08315	1517165	1517593	PF_RS08295	1533831	1534259	PF1645	rplM	50S ribosomal protein L13
PFDSM3638_08320	1517600	1517962	PF_RS08300	1534266	1534628	PF1646	PFDSM3638_08320	50S ribosomal protein L18e
PFDSM3638_08330	1518124	1518909	PF_RS08310	1534790	1535575	PF1647	PFDSM3638_08330	DNA-directed RNA polymerase subunit D
PFDSM3638_08335	1518943	1519356	PF_RS08315	1535609	1536022	PF1648	PFDSM3638_08335	30S ribosomal protein S11
PFDSM3638_08340	1519353	1519895	PF_RS08320	1536019	1536561	PF1649	PFDSM3638_08340	30S ribosomal protein S4
PFDSM3638_08345	1519914	1520360	PF_RS08325	1536580	1537026	PF1650	PFDSM3638_08345	30S ribosomal protein S13
PFDSM3638_08355	1520470	1521057	PF_RS10750	1537136	1537723	PF1651	PFDSM3638_08355	class I SAM-dependent methyltransferase
PFDSM3638_08360	1521152	1521652	PF_RS08335	1537818	1538318	PF1652	PFDSM3638_08360	hypothetical protein
PFDSM3638_08365	1521649	1522002	PF_RS08340	1538315	1538668	PF1653	PFDSM3638_08365	DUF3783 domain-containing protein
PFDSM3638_08370	1522104	1523849	PF_RS08345	1538770	1540515	PF1654	PFDSM3638_08370	ABC transporter ATP-binding protein
PFDSM3638_08375	1523839	1525575	PF_RS08350	1540505	1542241	PF1655	PFDSM3638_08375	ABC transporter ATP-binding protein
PFDSM3638_08380	1525572	1526135	PF_RS08355	1542238	1542801	PF1656	PFDSM3638_08380	NADH oxidase
PFDSM3638_08385	1526337	1527218	PF_RS08360	1543003	1543884	PF1657	PFDSM3638_08385	ATP phosphoribosyltransferase regulatory subunit
PFDSM3638_08390	1527215	1527829	PF_RS08365	1543881	1544495	PF1658	PFDSM3638_08390	ATP phosphoribosyltransferase
PFDSM3638_08395	1527819	1528946	PF_RS08370	1544485	1545612	PF1659	hisD	histidinol dehydrogenase
PFDSM3638_08400	1529013	1529543	PF_RS08375	1545679	1546209	PF1660	PFDSM3638_08400	imidazoleglycerol-phosphate dehydratase
PFDSM3638_08405	1529543	1530127	PF_RS08380	1546209	1546793	PF1661	hisH	imidazole glycerol phosphate synthase subunit HisH
PFDSM3638_08410	1530129	1530851	PF_RS08385	1546795	1547517	PF1662	hisA	1-(5-phosphoribosyl)-5-[(5- phosphoribosylamino)methylideneamino]imidazole-4- carboxamide isomerase
PFDSM3638_08415	1530820	1531575	PF_RS08390	1547486	1548241	PF1663	PFDSM3638_08415	imidazole glycerol phosphate synthase cyclase subunit
PFDSM3638_08420	1531586	1532215	PF_RS08395	1548252	1548881	PF1664	PFDSM3638_08420	bifunctional phosphoribosyl-AMP cyclohydrolase/phosphoribosyl-ATP diphosphatase
PFDSM3638_08425	1532212	1533228	PF_RS08400	1548878	1549894	PF1665	PFDSM3638_08425	histidinol-phosphate transaminase
PFDSM3638_08430	1533219	1533935	PF_RS08405	1549885	1550601	PF1666	PFDSM3638_08430	hydrolase
PFDSM3638_08435	1533940	1534269	PF_RS08410	1550606	1550935	PF1667	metG	methionine--tRNA ligase subunit beta
PFDSM3638_08445	1534384	1534746	PF_RS08415	1551050	1551412	PF1668	PFDSM3638_08445	hypothetical protein
PFDSM3638_08450	1534747	1536477	PF_RS08420	1551413	1553143	PF1669	PFDSM3638_08450	hypothetical protein
PFDSM3638_08455	1536525	1538489	PF_RS08425	1553191	1555155	PF1670	PFDSM3638_08455	alkaline serine protease
PFDSM3638_08460	1538767	1539624	PF_RS08430	1555433	1556290	PF1671	PFDSM3638_08460	EamA/RhaT family transporter
PFDSM3638_08465	1539683	1540351	PF_RS08435	1556349	1557017	PF1672	PFDSM3638_08465	DUF434 domain-containing protein
PFDSM3638_08470	1540478	1541083	PF_RS08440	1557144	1557749	PF1673	PFDSM3638_08470	protoporphyrinogen oxidase
PFDSM3638_08485	1541366	1541854	PF_RS08455	1558032	1558520	PF1674	PFDSM3638_08485	protein tyrosine phosphatase
PFDSM3638_08490	1541883	1542569	PF_RS08460	1558549	1559235	PF1675	PFDSM3638_08490	aspartate/glutamate racemase family protein
PFDSM3638_08495	1542540	1543277	PF_RS08465	1559206	1559943	PF1676	PFDSM3638_08495	biotin--[acetyl-CoA-carboxylase] ligase
PFDSM3638_08500	1543373	1543888	PF_RS08470	1560039	1560554	PF1677	PFDSM3638_08500	biotin transporter BioY
PFDSM3638_08505	1544113	1545192	PF_RS08475	1560779	1561858	PF1678	lysS	homocitrate synthase
PFDSM3638_08510	1545189	1546331	PF_RS08480	1561855	1562997	PF1679	PFDSM3638_08510	3-isopropylmalate dehydratase
PFDSM3638_08515	1546328	1546822	PF_RS08485	1562994	1563488	PF1680	PFDSM3638_08515	3-isopropylmalate dehydratase
PFDSM3638_08520	1547016	1547183	PF_RS08490	1563682	1563849	PF1681	lysW	lysine biosynthesis protein LysW
PFDSM3638_08525	1547221	1548042	PF_RS08495	1563887	1564708	PF1682	lysX	lysine biosynthesis protein LysX
PFDSM3638_08530	1548039	1549031	PF_RS08500	1564705	1565697	PF1683	PFDSM3638_08530	N-acetyl-gamma-glutamyl-phosphate reductase
PFDSM3638_08535	1549042	1549791	PF_RS08505	1565708	1566457	PF1684	argB	acetylglutamate kinase
PFDSM3638_08540	1549797	1550897	PF_RS08510	1566463	1567563	PF1685	PFDSM3638_08540	acetylornithine/acetyl-lysine aminotransferase
PFDSM3638_08545	1550872	1551852	PF_RS08515	1567538	1568518	PF1686	PFDSM3638_08545	acetyl-lysine deacetylase
PFDSM3638_08550	1552006	1552320	PF_RS08520	1568672	1568986	PF1687	PFDSM3638_08550	hypothetical protein
PFDSM3638_08555	1552313	1552966	PF_RS08525	1568979	1569632	PF1688	PFDSM3638_08555	transketolase
PFDSM3638_08560	1552963	1553886	PF_RS08530	1569629	1570552	PF1689	PFDSM3638_08560	transketolase
PFDSM3638_08565	1553897	1554685	PF_RS08535	1570563	1571351	PF1690	aroF	3-deoxy-7-phosphoheptulonate synthase
PFDSM3638_08570	1554673	1555680	PF_RS08540	1571339	1572346	PF1691	aroB	3-dehydroquinate synthase
PFDSM3638_08575	1555673	1556326	PF_RS08545	1572339	1572992	PF1692	aroD	3-dehydroquinase
PFDSM3638_08580	1556323	1557138	PF_RS08550	1572989	1573804	PF1693	PFDSM3638_08580	shikimate dehydrogenase
PFDSM3638_08585	1557113	1557934	PF_RS08555	1573779	1574600	PF1694	PFDSM3638_08585	shikimate kinase
PFDSM3638_08590	1557984	1559180	PF_RS08560	1574650	1575846	PF1695	PFDSM3638_08590	BMP family ABC transporter substrate-binding protein
PFDSM3638_08595	1559225	1560730	PF_RS08565	1575891	1577396	PF1696	PFDSM3638_08595	ABC transporter ATP-binding protein
PFDSM3638_08600	1560714	1561703	PF_RS08570	1577380	1578369	PF1697	PFDSM3638_08600	ABC transporter permease
PFDSM3638_08605	1561696	1562604	PF_RS08575	1578362	1579270	PF1698	PFDSM3638_08605	ABC transporter permease
PFDSM3638_08610	1562579	1563901	PF_RS08580	1579245	1580567	PF1699	aroA	3-phosphoshikimate 1-carboxyvinyltransferase
PFDSM3638_08615	1563898	1564983	PF_RS08585	1580593	1581651	PF1700	PFDSM3638_08615	chorismate synthase
PFDSM3638_08620	1565050	1565280	PF_RS08590	1581718	1581948	PF1701	PFDSM3638_08620	chorismate mutase
PFDSM3638_08625	1565264	1566301	PF_RS08595	1581932	1582969	PF1702	PFDSM3638_08625	aspartate aminotransferase
PFDSM3638_08630	1566286	1566732	PF_RS08600	1582954	1583400	PF1703	PFDSM3638_08630	prephenate dehydrogenase/arogenate dehydrogenase family protein
PFDSM3638_08635	1566653	1567060	PF_RS08605	1583321	1583728	PF1704	PFDSM3638_08635	prephenate dehydrogenase/arogenate dehydrogenase family protein
PFDSM3638_08640	1567049	1567795	PF_RS08610	1583717	1584463	PF1705	PFDSM3638_08640	tryptophan synthase subunit alpha
PFDSM3638_08645	1567788	1568954	PF_RS08615	1584456	1585622	PF1706	trpB	tryptophan synthase subunit beta
PFDSM3638_08650	1568941	1569567	PF_RS08620	1585609	1586235	PF1707	PFDSM3638_08650	phosphoribosylanthranilate isomerase
PFDSM3638_08655	1569567	1570133	PF_RS08625	1586235	1586801	PF1708	PFDSM3638_08655	type 1 glutamine amidotransferase
PFDSM3638_08660	1570135	1571433	PF_RS08630	1586803	1588101	PF1709	PFDSM3638_08660	anthranilate synthase component I
PFDSM3638_08665	1571415	1572389	PF_RS08635	1588083	1589057	PF1710	trpD	anthranilate phosphoribosyltransferase
PFDSM3638_08670	1572389	1573075	PF_RS08640	1589057	1589743	PF1711	PFDSM3638_08670	indole-3-glycerol-phosphate synthase
PFDSM3638_08675	1573232	1573912	PF_RS08645	1589900	1590580	PF1712	PFDSM3638_08675	ACT domain-containing protein
PFDSM3638_08680	1574007	1575122	PF_RS08650	1590675	1591790	PF1713	PFDSM3638_08680	carbamoyl-phosphate synthase small subunit
PFDSM3638_08685	1575119	1578289	PF_RS08655	1591787	1594957	PF1714	PFDSM3638_08685	carbamoyl phosphate synthase large subunit
PFDSM3638_08690	1578278	1579063	PF_RS08660	1594946	1595731	PF1715	PFDSM3638_08690	pyrroline-5-carboxylate reductase
PFDSM3638_08695	1579130	1579546	PF_RS08665	1595798	1596214	PF1716	PFDSM3638_08695	nucleotide-binding protein
PFDSM3638_08700	1579552	1580787	PF_RS08670	1596220	1597455	PF1717	PFDSM3638_08700	translation initiation factor IF-2 subunit gamma
PFDSM3638_08705	1580846	1581862	PF_RS08675	1597514	1598530	PF1718	PFDSM3638_08705	4-demethylwyosine synthase TYW1
PFDSM3638_08710	1582035	1582535	PF_RS08680	1598702	1599202	PF1719	PFDSM3638_08710	glutamine amidotransferase
PFDSM3638_08715	1582605	1583333	PF_RS08685	1599272	1600000	PF1720	PFDSM3638_08715	hypothetical protein
PFDSM3638_08720	1583317	1584228	PF_RS08690	1599984	1600895	PF1721	PFDSM3638_08720	apo-citrate lyase phosphoribosyl-dephospho-CoA transferase
PFDSM3638_08725	1584462	1584665	PF_RS08695	1601129	1601332	PF1722	PFDSM3638_08725	histone
PFDSM3638_08730	1584745	1586022	PF_RS08700	1601412	1602689	PF1723	PFDSM3638_08730	TIGR04013 family B12-binding domain/radical SAM domain-containing protein
PFDSM3638_08735	1586088	1586483	PF_RS08705	1602755	1603150	PF1724	PFDSM3638_08735	hypothetical protein
PFDSM3638_08740	1586483	1587841	PF_RS08710	1603150	1604493	PF1725	PFDSM3638_08740	hypothetical protein
PFDSM3638_08745	1587905	1588666	PF_RS08715	1604557	1605318	PF1726	PFDSM3638_08745	hypothetical protein
PFDSM3638_08750	1588667	1589188	PF_RS08720	1605319	1605840	PF1727	PFDSM3638_08750	hypothetical protein
PFDSM3638_08755	1589272	1590357	PF_RS08725	1605924	1607009	PF1728	PFDSM3638_08755	NDP-sugar synthase
PFDSM3638_08760	1590368	1591072	PF_RS08730	1607020	1607724	PF1729	PFDSM3638_08760	phospho-sugar mutase
PFDSM3638_08765	1591088	1591720	PF_RS08735	1607740	1608372	PF1730	PFDSM3638_08765	thymidylate kinase
PFDSM3638_08770	1591707	1593038	PF_RS08740	1608359	1609690	PF1731	PFDSM3638_08770	signal recognition particle protein
PFDSM3638_08775	1593038	1593271	PF_RS08745	1609690	1609923	PF1732	PFDSM3638_08775	AsnC family transcriptional regulator
PFDSM3638_08780	1593281	1593832	PF_RS08750	1609933	1610484	PF1733	PFDSM3638_08780	YkgJ family cysteine cluster protein
PFDSM3638_08785	1593765	1594211	PF_RS08755	1610417	1610863	PF1734	PFDSM3638_08785	AsnC family transcriptional regulator
PFDSM3638_08790	1594208	1594921	PF_RS08760	1610860	1611573	PF1735	PFDSM3638_08790	adenine phosphoribosyltransferase
PFDSM3638_08800	1595188	1595592	PF_RS08770	1611840	1612244	PF1735.2n	PFDSM3638_08800	hypothetical protein
PFDSM3638_08805	1595779	1596480	PF_RS08775	1612431	1613132	PF1736	PFDSM3638_08805	IS6 family transposase ISPfu1	Deletion 16kb fragment
PFDSM3638_08810	1596546	1598264	PF_RS08855	1630272	1631990	PF1753	PFDSM3638_08810	glutamate--tRNA ligase
PFDSM3638_08815	1598276	1598776	PF_RS08860	1632002	1632502	PF1754	PFDSM3638_08815	fumarate hydratase
PFDSM3638_08820	1598767	1599594	PF_RS08865	1632493	1633320	PF1755	PFDSM3638_08820	fumarate hydratase
PFDSM3638_08825	1599599	1599784	PF_RS08870	1633325	1633510	PF1755.1n	PFDSM3638_08825	TIGR04140 family protein
PFDSM3638_08830	1599833	1600177	PF_RS08875	1633559	1633903	PF1756	PFDSM3638_08830	hypothetical protein
PFDSM3638_08835	1600177	1600887	PF_RS08880	1633903	1634613	PF1757	PFDSM3638_08835	YhfC family intramembrane metalloprotease
PFDSM3638_08840	1600877	1601836	PF_RS08885	1634603	1635562	PF1758	PFDSM3638_08840	tRNA lysidine(34) synthetase TilS
PFDSM3638_08845	1602020	1603465	PF_RS08890	1635746	1637191	PF1759	PFDSM3638_08845	potassium transporter Kef
PFDSM3638_08850	1603471	1604598	PF_RS08895	1637197	1638324	PF1760	PFDSM3638_08850	ATP-NAD kinase
PFDSM3638_08855	1604702	1605862	PF_RS08900	1638428	1639594	PF1761	PFDSM3638_08855	hypothetical protein
PFDSM3638_08860	1605859	1606932	PF_RS08905	1639584	1640657	PF1762	PFDSM3638_08860	cell wall-binding repeat-containing protein
PFDSM3638_08865	1606933	1608096	PF_RS08910	1640658	1641821	PF1763	PFDSM3638_08865	GTP-binding protein
PFDSM3638_08870	1608205	1608882	PF_RS08915	1641930	1642607	PF1764	PFDSM3638_08870	metal-dependent hydrolase
PFDSM3638_08875	1608871	1609149	PF_RS08920	1642596	1642874	PF1765	PFDSM3638_08875	YggU family protein
PFDSM3638_08880	1609142	1610110	PF_RS08925	1642867	1643835	PF1766	PFDSM3638_08880	signal recognition particle-docking protein FtsY
PFDSM3638_08885	1610279	1610539	PF_RS08930	1644004	1644264	PF1767	PFDSM3638_08885	ferredoxin family protein
PFDSM3638_08890	1610542	1611732	PF_RS08935	1644267	1645457	PF1768	PFDSM3638_08890	2-oxoglutarate synthase subunit alpha
PFDSM3638_08895	1611732	1612580	PF_RS08940	1645457	1646305	PF1769	PFDSM3638_08895	2-oxoglutarate synthase
PFDSM3638_08900	1612584	1613099	PF_RS08945	1646309	1646824	PF1770	PFDSM3638_08900	2-oxoglutarate ferredoxin oxidoreductase subunit gamma
PFDSM3638_08905	1613092	1614255	PF_RS08950	1646817	1647980	PF1771	PFDSM3638_08905	2-oxoglutarate synthase subunit alpha
PFDSM3638_08910	1614252	1615097	PF_RS08955	1647977	1648822	PF1772	PFDSM3638_08910	2-oxoglutarate synthase
PFDSM3638_08915	1615094	1615636	PF_RS08960	1648819	1649361	PF1773	PFDSM3638_08915	2-oxoglutarate ferredoxin oxidoreductase subunit gamma
PFDSM3638_08920	1615716	1616756	PF_RS08965	1649441	1650532	PF1774	PFDSM3638_08920	ABC transporter substrate-binding protein
PFDSM3638_08925	1616772	1617227	PF_RS08970	1650498	1650953	PF1775	PFDSM3638_08925	ligand-binding protein SH3
PFDSM3638_08930	1617242	1617817	PF_RS08975	1650968	1651543	PF1776	PFDSM3638_08930	ASCH domain-containing protein
PFDSM3638_08935	1617777	1618499	PF_RS08980	1651503	1652225	PF1777	PFDSM3638_08935	haloacid dehalogenase
PFDSM3638_08940	1618542	1619825	PF_RS08985	1652268	1653551	PF1778	PFDSM3638_08940	serine hydroxymethyltransferase
PFDSM3638_08945	1619997	1620785	PF_RS08990	1653723	1654511	PF1779	PFDSM3638_08945	ABC transporter
PFDSM3638_08950	1620782	1621609	PF_RS08995	1654508	1655335	PF1780	PFDSM3638_08950	metal ABC transporter permease
PFDSM3638_08955	1621609	1622283	PF_RS09000	1655335	1656009	PF1781	PFDSM3638_08955	ribonuclease HII
PFDSM3638_08960	1622251	1623792	PF_RS09005	1655977	1657518	PF1782	PFDSM3638_08960	dolichyl-phosphate-mannose--protein mannosyltransferase
PFDSM3638_08965	1623774	1624961	PF_RS09010	1657500	1658687	PF1783	PFDSM3638_08965	molybdopterin molybdenumtransferase MoeA
PFDSM3638_08970	1625002	1626366	PF_RS09015	1658728	1660092	PF1784	pfkC	ADP-specific phosphofructokinase
PFDSM3638_08975	1626479	1627501	PF_RS09020	1660205	1661227	PF1785	PFDSM3638_08975	RNA-guided pseudouridylation complex pseudouridine synthase subunit Cbf5
PFDSM3638_08980	1627504	1627836	PF_RS09025	1661230	1661562	PF1786	PFDSM3638_08980	hypothetical protein
PFDSM3638_08985	1627941	1628639	PF_RS09030	1661667	1662365	PF1787	PFDSM3638_08985	acetyl-CoA synthetase
PFDSM3638_08990	1628686	1629609	PF_RS09035	1662412	1663335	PF1788	PFDSM3638_08990	nucleoside-diphosphate sugar epimerase
PFDSM3638_08995	1629666	1630322	PF_RS09040	1663392	1664048	PF1789	PFDSM3638_08995	HAD family hydrolase
PFDSM3638_09000	1630406	1631014	PF_RS09045	1664132	1664740	PF1790	PFDSM3638_09000	transcriptional regulator
PFDSM3638_09005	1631049	1631342	PF_RS09050	1664775	1665068	PF1791	PFDSM3638_09005	H/ACA RNA-protein complex protein Gar1
PFDSM3638_09010	1631361	1631855	PF_RS09055	1665087	1665581	PF1792	PFDSM3638_09010	metallophosphoesterase
PFDSM3638_09015	1631834	1632463	PF_RS09060	1665560	1666189	PF1793	cas4	CRISPR-associated protein Cas4
PFDSM3638_09025	1632794	1633357	PF_RS09065	1666520	1667083	PF1794	PFDSM3638_09025	inosine-5-monophosphate dehydrogenase
PFDSM3638_09030	1633424	1634848	PF_RS09070	1667150	1668574	PF1795	PFDSM3638_09030	sarcosine oxidase subunit alpha
PFDSM3638_09035	1634845	1635351	PF_RS09075	1668571	1669077	PF1796	PFDSM3638_09035	ferredoxin
PFDSM3638_09040	1635348	1635608	PF_RS09080	1669074	1669334	PF1797	PFDSM3638_09040	(2Fe-2S)-binding protein
PFDSM3638_09045	1635605	1636741	PF_RS09085	1669331	1670467	PF1798	PFDSM3638_09045	FAD-binding oxidoreductase
PFDSM3638_09050	1636738	1637265	PF_RS09090	1670464	1670991	PF1799	PFDSM3638_09050	DUF106 domain-containing protein
PFDSM3638_09055	1637258	1637848	PF_RS09095	1670984	1671574	PF1800	PFDSM3638_09055	adenylate kinase
PFDSM3638_09060	1637923	1639329	PF_RS09100	1671649	1673055	PF1801	PFDSM3638_09060	preprotein translocase subunit SecY
PFDSM3638_09065	1639381	1639824	PF_RS09105	1673107	1673550	PF1802	PFDSM3638_09065	50S ribosomal protein L15
PFDSM3638_09070	1639835	1640302	PF_RS09110	1673561	1674028	PF1803	PFDSM3638_09070	50S ribosomal protein L30
PFDSM3638_09075	1640314	1641024	PF_RS09115	1674040	1674750	PF1804	rpsE	30S ribosomal protein S5
PFDSM3638_09080	1641021	1641632	PF_RS09120	1674747	1675358	PF1805	PFDSM3638_09080	50S ribosomal protein L18
PFDSM3638_09085	1641644	1642096	PF_RS09125	1675370	1675822	PF1806	PFDSM3638_09085	50S ribosomal protein L19e
PFDSM3638_09090	1642108	1642500	PF_RS09130	1675834	1676226	PF1807	PFDSM3638_09090	50S ribosomal protein L32e
PFDSM3638_09095	1642511	1643065	PF_RS09135	1676237	1676791	PF1808	PFDSM3638_09095	50S ribosomal protein L6
PFDSM3638_09100	1643085	1643477	PF_RS09140	1676811	1677203	PF1809	PFDSM3638_09100	30S ribosomal protein S8
PFDSM3638_09105	1643493	1643663	PF_RS09145	1677219	1677389	PF1810	rps14P	30S ribosomal protein S14
PFDSM3638_09110	1643668	1644228	PF_RS09150	1677394	1677954	PF1811	PFDSM3638_09110	50S ribosomal protein L5
PFDSM3638_09115	1644239	1644970	PF_RS09155	1677965	1678696	PF1812	PFDSM3638_09115	30S ribosomal protein S4e
PFDSM3638_09120	1644970	1645335	PF_RS09160	1678696	1679061	PF1813	rplX	50S ribosomal protein L24
PFDSM3638_09125	1645346	1645771	PF_RS09165	1679072	1679497	PF1814	PFDSM3638_09125	50S ribosomal protein L14
PFDSM3638_09130	1645777	1646118	PF_RS09170	1679503	1679844	PF1815	PFDSM3638_09130	30S ribosomal protein S17
PFDSM3638_09135	1646115	1646498	PF_RS09175	1679841	1680224	PF1816	PFDSM3638_09135	ribonuclease P
PFDSM3638_09140	1646384	1646680	PF_RS09180	1680110	1680406	PF1817	yciH	stress response translation initiation inhibitor YciH
PFDSM3638_09145	1646693	1646911	PF_RS09185	1680419	1680637	PF1818	rpmC	50S ribosomal protein L29
PFDSM3638_09150	1646898	1647530	PF_RS09190	1680624	1681256	PF1819	rpsC	30S ribosomal protein S3
PFDSM3638_09155	1647535	1648002	PF_RS09195	1681261	1681728	PF1820	rplV	50S ribosomal protein L22
PFDSM3638_09160	1648013	1648411	PF_RS09200	1681739	1682137	PF1821	rpsS	30S ribosomal protein S19
PFDSM3638_09165	1648422	1649141	PF_RS09205	1682148	1682867	PF1822	PFDSM3638_09165	50S ribosomal protein L2
PFDSM3638_09170	1649153	1649413	PF_RS09210	1682879	1683139	PF1823	PFDSM3638_09170	50S ribosomal protein L23
PFDSM3638_09175	1649419	1650186	PF_RS09215	1683145	1683912	PF1824	PFDSM3638_09175	50S ribosomal protein L4
PFDSM3638_09180	1650202	1651299	PF_RS09220	1683928	1685025	PF1825	PFDSM3638_09180	50S ribosomal protein L3
PFDSM3638_09185	1651302	1652084	PF_RS09225	1685028	1685810	PF1826	PFDSM3638_09185	methylase
PFDSM3638_09190	1652233	1653072	PF_RS09230	1685959	1686798	PF1827	PFDSM3638_09190	CBS domain-containing protein
PFDSM3638_09195	1653177	1653572	PF_RS09235	1686903	1687298	PF1828	PFDSM3638_09195	DUF552 domain-containing protein
PFDSM3638_09200	1653657	1654895	PF_RS09240	1687383	1688621	PF1829	PFDSM3638_09200	HD domain-containing protein
PFDSM3638_09205	1654958	1655425	PF_RS09245	1688684	1689151	PF1830	PFDSM3638_09205	hypothetical protein
PFDSM3638_09210	1655639	1655842	PF_RS09250	1689365	1689568	PF1831	PFDSM3638_09210	histone
PFDSM3638_09215	1655929	1656732	PF_RS09255	1689655	1690458	PF1832	PFDSM3638_09215	GTP cyclohydrolase IV
PFDSM3638_09220	1656710	1657324	PF_RS09260	1690436	1691050	PF1833	PFDSM3638_09220	peptidase
PFDSM3638_09225	1657369	1657881	PF_RS09265	1691095	1691607	PF1834	PFDSM3638_09225	DUF998 domain-containing protein
PFDSM3638_09230	1657878	1658483	PF_RS09270	1691604	1692209	PF1835	PFDSM3638_09230	hypothetical protein
PFDSM3638_09235	1658480	1658767	PF_RS09275	1692206	1692493	PF1836	PFDSM3638_09235	hypothetical protein
PFDSM3638_09240	1658776	1659486	PF_RS09280	1692502	1693212	PF1837	PFDSM3638_09240	acetyl-CoA synthetase
PFDSM3638_09245	1659490	1660911	PF_RS09285	1693216	1694637	PF1838	PFDSM3638_09245	CoA-binding protein
PFDSM3638_09250	1661041	1662654	PF_RS09290	1694767	1696380	PF1839	pyrG	CTP synthetase
PFDSM3638_09255	1662641	1663075	PF_RS09295	1696367	1696801	PF1840	PFDSM3638_09255	hypothetical protein
PFDSM3638_09260	1663058	1663429	PF_RS09300	1696784	1697155	PF1841	PFDSM3638_09260	hypothetical protein
PFDSM3638_09265	1663799	1664437	PF_RS09305	1697525	1698163	PF1842	PFDSM3638_09265	segregation/condensation protein A
PFDSM3638_09270	1664427	1667960	PF_RS09310	1698153	1701686	PF1843	smc	chromosome segregation protein SMC
PFDSM3638_09275	1668034	1668363	PF_RS09315	1701760	1702089	PF1844	PFDSM3638_09275	CidA/LrgA family protein
PFDSM3638_09280	1668360	1669034	PF_RS09320	1702086	1702760	PF1845	PFDSM3638_09280	CidB/LrgB family autolysis modulator
PFDSM3638_09285	1669041	1669625	PF_RS09325	1702767	1703351	PF1846	PFDSM3638_09285	CPBP family intramembrane metalloprotease
PFDSM3638_09290	1669618	1670943	PF_RS09330	1703344	1704669	PF1847	PFDSM3638_09290	TATA box-binding protein
PFDSM3638_09295	1671019	1672245	PF_RS09335	1704745	1705971	PF1848	hmgA	hydroxymethylglutaryl-CoA reductase (NADPH)
PFDSM3638_09300	1672261	1673022	PF_RS09340	1705987	1706748	PF1849	PFDSM3638_09300	MinD/ParA family protein
PFDSM3638_09305	1673187	1674554	PF_RS09345	1706913	1708280	PF1850	PFDSM3638_09305	MATE family efflux transporter
PFDSM3638_09310	1674551	1675498	PF_RS09350	1708277	1709224	PF1851	PFDSM3638_09310	transcriptional regulator
PFDSM3638_09315	1675536	1676588	PF_RS09355	1709262	1710314	PF1852	PFDSM3638_09315	glutamate synthase
PFDSM3638_09320	1676809	1677588	PF_RS09360	1710535	1711314	PF1853	PFDSM3638_09320	sugar dehydrogenase
PFDSM3638_09325	1677569	1678039	PF_RS09365	1711295	1711765	PF1854	PFDSM3638_09325	cyclic pyranopterin monophosphate synthase MoaC
PFDSM3638_09330	1678091	1679365	PF_RS09370	1711817	1713091	PF1855	PFDSM3638_09330	tRNA(Ile2) 2-agmatinylcytidine synthetase
PFDSM3638_09335	1679408	1680889	PF_RS09375	1713134	1714615	PF1856	PFDSM3638_09335	potassium transporter
PFDSM3638_09340	1680886	1681746	PF_RS09380	1714612	1715471	PF1857	PFDSM3638_09340	energy-coupling factor ABC transporter ATP-binding protein
PFDSM3638_09345	1681869	1682723	PF_RS09385	1715594	1716448	PF1858	PFDSM3638_09345	cysteine synthase
PFDSM3638_09350	1682638	1683189	PF_RS09390	1716363	1716914	PF1859	PFDSM3638_09350	adenylate cyclase
PFDSM3638_09355	1683170	1683739	PF_RS09395	1716895	1717464	PF1860	PFDSM3638_09355	archemetzincin
PFDSM3638_09360	1683745	1684785	PF_RS09400	1717470	1718510	PF1861	PFDSM3638_09360	peptidase M42
PFDSM3638_09365	1685067	1685684	PF_RS09405	1718792	1719409	PF1862	PFDSM3638_09365	DUF655 domain-containing protein
PFDSM3638_09370	1685687	1686508	PF_RS09410	1719412	1720233	PF1863	PFDSM3638_09370	16S rRNA methyltransferase
PFDSM3638_09375	1686549	1687250	PF_RS09415	1720274	1720975	PF1864	PFDSM3638_09375	IS6 family transposase ISPfu2
PFDSM3638_09380	1687329	1688108	PF_RS09420	1721054	1721833	PF1865	PFDSM3638_09380	DUF835 domain-containing protein
PFDSM3638_09385	1688105	1689310	PF_RS09425	1721830	1723035	PF1866	PFDSM3638_09385	S-adenosylmethionine synthetase
PFDSM3638_09390	1689466	1690335	PF_RS09430	1723191	1724060	PF1867	PFDSM3638_09390	topoisomerase
PFDSM3638_09395	1690310	1691170	PF_RS09435	1724035	1724895	PF1868	PFDSM3638_09395	recombinase XerC
PFDSM3638_09400	1691171	1692076	PF_RS09440	1724896	1725801	PF1869	PFDSM3638_09400	pantothenate kinase
PFDSM3638_09405	1692069	1692284	PF_RS09445	1725794	1726009	PF1870	PFDSM3638_09405	hypothetical protein
PFDSM3638_09410	1692281	1693420	PF_RS09450	1726006	1727145	PF1871	PFDSM3638_09410	tRNA (guanine(10)-N(2))-dimethyltransferase
PFDSM3638_09415	1693431	1693694	PF_RS09455	1727156	1727419	PF1872	PFDSM3638_09415	50S ribosomal protein L35ae
PFDSM3638_09420	1693786	1694454	PF_RS09460	1727511	1728179	PF1873	PFDSM3638_09420	hypothetical protein
PFDSM3638_09425	1694503	1695507	PF_RS09465	1728228	1729232	PF1874	PFDSM3638_09425	type II glyceraldehyde-3-phosphate dehydrogenase
PFDSM3638_09430	1695564	1695863	PF_RS09470	1729289	1729588	PF1875	PFDSM3638_09430	hypothetical protein
PFDSM3638_09435	1695850	1696443	PF_RS09475	1729575	1730168	PF1876	PFDSM3638_09435	ECF transporter S component
PFDSM3638_09440	1696510	1697424	PF_RS09480	1730235	1731149	PF1877	PFDSM3638_09440	thiamine-phosphate kinase
PFDSM3638_09445	1697408	1697932	PF_RS09485	1731133	1731657	PF1878	PFDSM3638_09445	cysteine methyltransferase
PFDSM3638_09450	1697920	1698936	PF_RS09490	1731645	1732661	PF1879	PFDSM3638_09450	GlcNAc transferase
PFDSM3638_09455	1699224	1699823	PF_RS09495	1732949	1733548	PF1880	PFDSM3638_09455	RNA ligase partner protein
PFDSM3638_09460	1699826	1700107	PF_RS09500	1733551	1733832	PF1881	albA	DNA-binding protein Alba
PFDSM3638_09465	1700210	1702600	PF_RS09505	1733935	1736325	PF1882	PFDSM3638_09465	AAA family ATPase
PFDSM3638_09470	1702772	1703275	PF_RS09510	1736497	1737000	PF1883	PFDSM3638_09470	Hsp20/alpha crystallin family protein
PFDSM3638_09475	1703584	1704498	PF_RS09515	1737309	1738223	PF1884	PFDSM3638_09475	lysylphosphatidylglycerol synthetase family protein
PFDSM3638_09480	1704479	1705615	PF_RS09520	1738204	1739340	PF1885	PFDSM3638_09480	glycosyltransferase family 1 protein
PFDSM3638_09485	1705642	1706526	PF_RS09525	1739367	1740251	PF1886	PFDSM3638_09485	carbohydrate kinase family protein
PFDSM3638_09490	1706520	1707341	PF_RS09530	1740245	1741066	PF1887	PFDSM3638_09490	ABC transporter permease
PFDSM3638_09495	1707328	1708131	PF_RS09535	1741053	1741856	PF1888	PFDSM3638_09495	ABC transporter permease
PFDSM3638_09500	1708128	1709084	PF_RS09540	1741853	1742809	PF1889	PFDSM3638_09500	daunorubicin resistance protein DrrA family ABC transporter ATP-binding protein
PFDSM3638_09505	1709150	1709932	PF_RS09545	1742875	1743657	PF1890	PFDSM3638_09505	hypothetical protein
PFDSM3638_09510	1710084	1710608	PF_RS09550	1743809	1744333	PF1891	PFDSM3638_09510	CBS domain-containing protein
PFDSM3638_09515	1710608	1711825	PF_RS09555	1744333	1745550	PF1892	PFDSM3638_09515	hypothetical protein
PFDSM3638_09520	1711928	1712173	PF_RS09560	1745653	1745898	PF1893	PFDSM3638_09520	AsnC family transcriptional regulator
PFDSM3638_09525	1712174	1712476	PF_RS09565	1745899	1746201	PF1894	PFDSM3638_09525	signal recognition particle protein Srp19
PFDSM3638_09530	1712534	1713148	PF_RS09570	1746259	1746873	PF1895	PFDSM3638_09530	biotin synthase
PFDSM3638_09535	1713145	1713906	PF_RS09575	1746870	1747631	PF1896	PFDSM3638_09535	tRNA methyltransferase
PFDSM3638_09545	1714254	1714493	PF_RS09585	1747976	1748215	PF1897	PFDSM3638_09545	ArsR family transcriptional regulator
PFDSM3638_09550	1714452	1714949	PF_RS09590	1748174	1748671	PF1898	PFDSM3638_09550	YkgJ family cysteine cluster protein
PFDSM3638_09555	1715011	1715802	PF_RS09595	1748733	1749524	PF1899	PFDSM3638_09555	NAD(P)-dependent oxidoreductase
PFDSM3638_09560	1715794	1716393	PF_RS09600	1749516	1750115	PF1900	PFDSM3638_09560	hypothetical protein
PFDSM3638_09565	1716329	1718251	PF_RS09605	1750198	1751973	PF1901	PFDSM3638_09565	tRNA uridine(34) 5-carboxymethylaminomethyl modification radical SAM/GNAT enzyme Elp3
PFDSM3638_09570	1718240	1719583	PF_RS09610	1751962	1753305	PF1902	PFDSM3638_09570	ATP-dependent helicase
PFDSM3638_09575	1719634	1720761	PF_RS09615	1753356	1754483	PF1903	PFDSM3638_09575	DUF790 domain-containing protein
PFDSM3638_09580	1720859	1722028	PF_RS09620	1754581	1755750	PF1904	PFDSM3638_09580	nicotinate phosphoribosyltransferase
PFDSM3638_09585	1722201	1723514	PF_RS09625	1755923	1757236	PF1905	PFDSM3638_09585	protease
PFDSM3638_09590	1723526	1724905	PF_RS09630	1757248	1758627	PF1906	PFDSM3638_09590	adenosylmethionine-8-amino-7-oxononanoate aminotransferase
PFDSM3638_09595	1725085	1725609	PF_RS09635	1758806	1759330	PF1907	PFDSM3638_09595	hypothetical protein
PFDSM3638_09600	1725621	1726472	PF_RS09640	1759342	1760193	PF1908	PFDSM3638_09600	hypothetical protein
PFDSM3638_09605	1726551	1726754	PF_RS09645	1760272	1760475	PF1909	PFDSM3638_09605	ferredoxin
PFDSM3638_09610	1726830	1728260	PF_RS09650	1760551	1761981	PF1910	gltA	glutamate synthase (NADPH), homotetrameric
PFDSM3638_09615	1728261	1729130	PF_RS09655	1761982	1762851	PF1911	PFDSM3638_09615	ferredoxin-NADP reductase
PFDSM3638_09620	1729270	1730547	PF_RS09660	1762991	1764268	PF1912	PFDSM3638_09620	threonylcarbamoyladenosine tRNA methylthiotransferase
PFDSM3638_09625	1730591	1731058	PF_RS09665	1764312	1764779	PF1913	PFDSM3638_09625	hypothetical protein
PFDSM3638_09630	1731034	1731678	PF_RS09670	1764755	1765399	PF1914	PFDSM3638_09630	ribonuclease P protein component 3
PFDSM3638_09635	1731717	1732904	PF_RS09675	1765438	1766625	PF1915	PFDSM3638_09635	hypothetical protein
PFDSM3638_09640	1732892	1734049	PF_RS09680	1766613	1767770	PF1916	PFDSM3638_09640	glycosyltransferase
PFDSM3638_09645	1734157	1735203	PF_RS09685	1767878	1768924	PF1917	PFDSM3638_09645	gfo/Idh/MocA family oxidoreductase
PFDSM3638_09650	1735358	1736488	PF_RS09690	1769079	1770209	PF1918	PFDSM3638_09650	hypothetical protein
PFDSM3638_09655	1736495	1737502	PF_RS09695	1770216	1771223	PF1919	PFDSM3638_09655	gfo/Idh/MocA family oxidoreductase
PFDSM3638_09660	1737506	1738192	PF_RS09700	1771227	1771913	PF1920	tpiA	triose-phosphate isomerase
PFDSM3638_09665	1738230	1738844	PF_RS09705	1771951	1772565	PF1921	PFDSM3638_09665	phosphoserine phosphatase
PFDSM3638_09670	1738841	1739605	PF_RS09710	1772562	1773380	PF1922	PFDSM3638_09670	protein-L-isoaspartate(D-aspartate) O-methyltransferase
PFDSM3638_09675	1739610	1740386	PF_RS09715	1773331	1774107	PF1923	PFDSM3638_09675	potassium transporter TrkA
PFDSM3638_09680	1740442	1741527	PF_RS09720	1774163	1775248	PF1924	PFDSM3638_09680	aminopeptidase
PFDSM3638_09685	1741524	1742600	PF_RS09725	1775245	1776321	PF1925	PFDSM3638_09685	hypothetical protein
PFDSM3638_09690	1742694	1743743	PF_RS09730	1776415	1777464	PF1926	radA	DNA repair and recombination protein RadA
PFDSM3638_09695	1743883	1744503	PF_RS09735	1777604	1778224	PF1927	PFDSM3638_09695	translation initiation factor 2
PFDSM3638_09700	1744564	1745340	PF_RS09740	1778285	1779061	PF1928	PFDSM3638_09700	ATP-binding protein
PFDSM3638_09705	1745387	1746079	PF_RS09745	1779108	1779800	PF1929	PFDSM3638_09705	DUF92 domain-containing protein
PFDSM3638_09710	1746412	1746831	PF_RS09750	1780133	1780552	PF1930	PFDSM3638_09710	adenosylmethionine decarboxylase
PFDSM3638_09715	1747013	1747756	PF_RS09755	1780734	1781477	PF1931	PFDSM3638_09715	KaiC domain-containing protein
PFDSM3638_09720	1747772	1748581	PF_RS09760	1781493	1782302	PF1932	PFDSM3638_09720	transcriptional regulator
PFDSM3638_09725	1748578	1749690	PF_RS09765	1782299	1783411	PF1933	PFDSM3638_09725	ABC transporter ATP-binding protein
PFDSM3638_09730	1749730	1753797	PF_RS09770	1783451	1786794	PF1935	PFDSM3638_09730	amylopullulanase
PFDSM3638_09735	1753808	1755055	PF_RS09775	1786805	1788052	PF1936	PFDSM3638_09735	sugar transporter
PFDSM3638_09740	1755052	1755948	PF_RS09780	1788049	1788945	PF1937	PFDSM3638_09740	sugar ABC transporter permease
PFDSM3638_09745	1755987	1757291	PF_RS09785	1788984	1790288	PF1938	PFDSM3638_09745	maltotriose-binding protein
PFDSM3638_09750	1757390	1759327	PF_RS09790	1790387	1792324	PF1939	PFDSM3638_09750	alpha-glycosidase
PFDSM3638_09755	1759390	1759662	PF_RS10765	1792561	1792629	-	PFDSM3638_09755	hypothetical protein
PFDSM3638_09760	1759856	1760356	PF_RS09795	1792853	1793353	PF1940	PFDSM3638_09760	hypothetical protein
PFDSM3638_09765	1760346	1760540	PF_RS09800	1793343	1793537	PF1940.1n	PFDSM3638_09765	hypothetical protein
PFDSM3638_09770	1760575	1762098	PF_RS09805	1793572	1795095	PF1941	PFDSM3638_09770	dihydropteroate synthase
PFDSM3638_09775	1762100	1763566	PF_RS09810	1795097	1796563	PF1942	PFDSM3638_09775	phosphoesterase
PFDSM3638_09780	1763684	1764238	PF_RS09815	1796681	1797235	PF1943	PFDSM3638_09780	hypothetical protein
PFDSM3638_09785	1764162	1765394	PF_RS09820	1797159	1798391	PF1944	PFDSM3638_09785	hypothetical protein
PFDSM3638_09795	1765440	1766036	PF_RS09825	1798437	1799033	PF1945	PFDSM3638_09795	hypothetical protein
PFDSM3638_09800	1766156	1766590	PF_RS09830	1799153	1799587	PF1946	PFDSM3638_09800	methylmalonyl-CoA mutase
PFDSM3638_09805	1766633	1767598	PF_RS09835	1799630	1800595	PF1947	PFDSM3638_09805	methylmalonyl Co-A mutase-associated GTPase MeaB
PFDSM3638_09810	1767591	1767992	PF_RS09840	1800588	1800989	PF1948	mce	methylmalonyl-CoA epimerase
PFDSM3638_09815	1767993	1768271	PF_RS09845	1800990	1801267	PF1949	PFDSM3638_09815	hypothetical protein
PFDSM3638_09820	1768275	1768922	PF_RS09850	1801271	1801918	PF1950	PFDSM3638_09820	phosphoribosyltransferase
PFDSM3638_09825	1768968	1769852	PF_RS09855	1801964	1802848	PF1951	PFDSM3638_09825	asparagine synthetase
PFDSM3638_09830	1769993	1771894	PF_RS09860	1802989	1804890	PF1952	PFDSM3638_09830	hypothetical protein
PFDSM3638_09835	1771971	1772510	PF_RS09865	1804967	1805506	PF1953	PFDSM3638_09835	inosine-5-monophosphate dehydrogenase
PFDSM3638_09840	1772561	1773295	PF_RS09870	1805557	1806291	PF1954	PFDSM3638_09840	molybdopterin-guanine dinucleotide biosynthesis protein MobB
PFDSM3638_09845	1773305	1773514	PF_RS09875	1806301	1806510	PF1955	PFDSM3638_09845	hypothetical protein
PFDSM3638_09850	1773619	1774464	PF_RS09880	1806615	1807460	PF1956	PFDSM3638_09850	fructose-bisphosphate aldolase
PFDSM3638_09855	1774526	1775386	PF_RS09885	1807522	1808382	PF1957	speB	agmatinase
PFDSM3638_09860	1775383	1775856	PF_RS09890	1808379	1808852	PF1958	PFDSM3638_09860	RNA-binding protein
PFDSM3638_09865	1775905	1777140	PF_RS09895	1808901	1810136	PF1959	PFDSM3638_09865	phosphoglycerate mutase
PFDSM3638_09870	1777248	1778084	PF_RS09900	1810244	1811080	PF1960	PFDSM3638_09870	aldo/keto reductase
PFDSM3638_09875	1778084	1779952	PF_RS09905	1811080	1812948	PF1961	PFDSM3638_09875	aldehyde ferredoxin oxidoreductase
PFDSM3638_09880	1779933	1780313	PF_RS09910	1812929	1813309	PF1962	PFDSM3638_09880	ribonucleoside-triphosphate reductase
PFDSM3638_09885	1780317	1781150	PF_RS09915	1813313	1814146	PF1963	PFDSM3638_09885	geranylgeranylglycerol-phosphate geranylgeranyltransferase
PFDSM3638_09890	1781251	1781433	PF_RS09920	1814247	1814429	PF1964	PFDSM3638_09890	RNA-binding protein
PFDSM3638_09895	1781434	1781709	PF_RS09925	1814430	1814705	PF1965	PFDSM3638_09895	elongation factor 1-beta
PFDSM3638_09900	1781706	1782710	PF_RS09930	1814702	1815706	PF1966	PFDSM3638_09900	tetratricopeptide repeat protein
PFDSM3638_09905	1782895	1784178	PF_RS09935	1815891	1817174	PF1967	PFDSM3638_09905	carbohydrate ABC transporter substrate-binding protein
PFDSM3638_09910	1784217	1785071	PF_RS09940	1817213	1818067	PF1968	PFDSM3638_09910	sugar ABC transporter permease
PFDSM3638_09915	1785068	1785901	PF_RS09945	1818064	1818897	PF1969	PFDSM3638_09915	carbohydrate ABC transporter permease
PFDSM3638_09920	1785907	1787001	PF_RS09950	1818903	1819997	PF1970	PFDSM3638_09920	ABC transporter ATP-binding protein
PFDSM3638_09925	1787221	1789038	PF_RS09955	1820217	1822034	PF1971	nrdD	anaerobic ribonucleoside-triphosphate reductase
PFDSM3638_09930	1789048	1789764	PF_RS09960	1822044	1822760	PF1972	PFDSM3638_09930	ribonucleoside-triphosphate reductase activating protein
PFDSM3638_09935	1789748	1790470	PF_RS09965	1822744	1823466	PF1973	PFDSM3638_09935	hypothetical protein
PFDSM3638_09940	1790624	1792273	PF_RS09970	1823620	1825269	PF1974	PFDSM3638_09940	thermosome subunit
PFDSM3638_09945	1792416	1793834	PF_RS09975	1825412	1826830	PF1975	PFDSM3638_09945	phosphoenolpyruvate carboxylase
PFDSM3638_09950	1793880	1795274	PF_RS09980	1826876	1828270	PF1976	PFDSM3638_09950	L-aspartate oxidase
PFDSM3638_09955	1795319	1796230	PF_RS09985	1828315	1829226	PF1977	PFDSM3638_09955	quinolinate synthase
PFDSM3638_09960	1796240	1797070	PF_RS09990	1829236	1830066	PF1978	nadC	nicotinate-nucleotide pyrophosphorylase
PFDSM3638_09965	1797048	1797680	PF_RS09995	1830044	1830676	PF1979	PFDSM3638_09965	TIGR00296 family protein
PFDSM3638_09970	1797673	1798242	PF_RS10000	1830669	1831238	PF1980	PFDSM3638_09970	hypothetical protein
PFDSM3638_09980	1798395	1799093	PF_RS10010	1831391	1832089	PF1981	PFDSM3638_09980	nucleotidyltransferase
PFDSM3638_09985	1799165	1799977	PF_RS10015	1832161	1832973	PF1982	PFDSM3638_09985	D-tyrosyl-tRNA(Tyr) deacylase
PFDSM3638_09990	1800107	1803097	PF_RS10020	1833103	1836093	PF1983	PFDSM3638_09990	hypothetical protein
PFDSM3638_09995	1803104	1803643	PF_RS10025	1836100	1836639	PF1984	PFDSM3638_09995	hypothetical protein
PFDSM3638_10000	1803736	1804330	PF_RS10030	1836732	1837326	PF1985	PFDSM3638_10000	IS607 family transposase
PFDSM3638_10005	1804305	1805539	PF_RS10035	1837301	1838535	PF1986	PFDSM3638_10005	transposase
PFDSM3638_10010	1805626	1806039	PF_RS10040	1838622	1839035	PF1987	PFDSM3638_10010	hypothetical protein
PFDSM3638_10015	1806108	1807226	PF_RS10045	1839104	1840222	PF1988	ftsZ	cell division protein FtsZ
PFDSM3638_10020	1807283	1807468	PF_RS10050	1840279	1840464	PF1989	PFDSM3638_10020	protein translocase SEC61 complex subunit gamma
PFDSM3638_10025	1807472	1807930	PF_RS10055	1840468	1840926	PF1990	PFDSM3638_10025	transcription elongation factor Spt5
PFDSM3638_10030	1807942	1808436	PF_RS10060	1840938	1841432	PF1991	PFDSM3638_10030	50S ribosomal protein L11
PFDSM3638_10035	1808515	1809165	PF_RS10065	1841511	1842161	PF1992	PFDSM3638_10035	50S ribosomal protein L1
PFDSM3638_10040	1809171	1810190	PF_RS10070	1842167	1843186	PF1993	PFDSM3638_10040	50S ribosomal protein L10
PFDSM3638_10045	1810237	1810560	PF_RS10075	1843233	1843556	PF1994	rpl12p	50S ribosomal protein P1
PFDSM3638_10050	1810665	1811207	PF_RS10080	1843661	1844203	PF1995	PFDSM3638_10050	hypothetical protein
PFDSM3638_10055	1811187	1811657	PF_RS10085	1844183	1844653	PF1996	PFDSM3638_10055	dCTP deaminase
PFDSM3638_10065	1812127	1812798	PF_RS10095	1845123	1845794	PF1997	PFDSM3638_10065	hypothetical protein
PFDSM3638_10070	1812826	1813533	PF_RS10100	1845822	1846529	PF1998	PFDSM3638_10070	hydrolase
PFDSM3638_10075	1813592	1814938	PF_RS10105	1846588	1847934	PF1999	PFDSM3638_10075	glycine dehydrogenase
PFDSM3638_10080	1814939	1816447	PF_RS10110	1847935	1849443	PF2000	PFDSM3638_10080	glycine dehydrogenase
PFDSM3638_10090	1816595	1816798	PF_RS10780	1849591	1849794	-	PFDSM3638_10090	hypothetical protein
PFDSM3638_10095	1816767	1817633	PF_RS10115	1849763	1850629	PF2001	PFDSM3638_10095	alpha/beta hydrolase
PFDSM3638_10100	1817647	1818975	PF_RS10120	1850643	1851971	PF2002	PFDSM3638_10100	MFS transporter
PFDSM3638_10105	1819130	1819876	PF_RS10125	1852126	1852872	PF2003	PFDSM3638_10105	glycerophosphodiester phosphodiesterase
PFDSM3638_10110	1819921	1821393	PF_RS10130	1852917	1854389	PF2004	glpK	glycerol kinase
PFDSM3638_10115	1821406	1822896	PF_RS10135	1854402	1855892	PF2005	PFDSM3638_10115	FAD/NAD(P)-binding oxidoreductase
PFDSM3638_10120	1822889	1824130	PF_RS10140	1855885	1857126	PF2006	PFDSM3638_10120	pyridine nucleotide-disulfide oxidoreductase
PFDSM3638_10125	1824123	1824473	PF_RS10145	1857119	1857469	PF2007	PFDSM3638_10125	DUF1667 domain-containing protein
PFDSM3638_10130	1824536	1824787	PF_RS10150	1857532	1857783	PF2008	rpl37ae	50S ribosomal protein L37ae
PFDSM3638_10135	1824795	1824944	PF_RS10155	1857791	1857940	PF2009	PFDSM3638_10135	DNA-directed RNA polymerase subunit P
PFDSM3638_10140	1824991	1825662	PF_RS10160	1857987	1858658	PF2010	PFDSM3638_10140	ribosomal biogenesis protein
PFDSM3638_10145	1825625	1825873	PF_RS10165	1858621	1858869	PF2011	PFDSM3638_10145	hypothetical protein
PFDSM3638_10150	1825966	1828164	PF_RS10170	1858962	1861160	PF2012	PFDSM3638_10150	elongation factor EF-2
PFDSM3638_10155	1828228	1829031	PF_RS10175	1861224	1862027	PF2013	PFDSM3638_10155	DUF63 domain-containing protein
PFDSM3638_10160	1829034	1829798	PF_RS10180	1862030	1862794	PF2014	PFDSM3638_10160	fructose-1,6-bisphosphatase
PFDSM3638_10165	1829807	1832098	PF_RS10185	1862803	1865094	PF2015	PFDSM3638_10165	DEAD/DEAH box helicase
PFDSM3638_10170	1832229	1832399	PF_RS10190	1865225	1865395	PF2016	PFDSM3638_10170	preprotein translocase subunit Sec61beta
PFDSM3638_10175	1832396	1833046	PF_RS10195	1865392	1866042	PF2017	PFDSM3638_10175	hypothetical protein
PFDSM3638_10180	1833092	1833901	PF_RS10200	1866088	1866897	PF2018	PFDSM3638_10180	replication protein RepA
PFDSM3638_10185	1833898	1834266	PF_RS10205	1866894	1867262	PF2019	PFDSM3638_10185	replication protein RepA
PFDSM3638_10190	1834268	1835344	PF_RS10210	1867264	1868340	PF2020	PFDSM3638_10190	replication factor A
PFDSM3638_10195	1835398	1835964	PF_RS10215	1868394	1868960	PF2021	scpB	SMC-Scp complex subunit ScpB
PFDSM3638_10200	1835993	1836742	PF_RS10220	1868989	1869738	PF2022	PFDSM3638_10200	MBL fold hydrolase
PFDSM3638_10205	1836794	1837423	PF_RS10225	1869790	1870419	PF2023	PFDSM3638_10205	IS607 family transposase
PFDSM3638_10210	1837416	1838669	PF_RS10230	1870412	1871665	PF2024	PFDSM3638_10210	transposase
PFDSM3638_10215	1838826	1839365	PF_RS10235	1871822	1872361	PF2025	PFDSM3638_10215	dinitrogenase iron-molybdenum cofactor
PFDSM3638_10220	1839530	1840393	PF_RS10785	1872526	1873389	-	PFDSM3638_10220	cobalamin biosynthesis protein CobQ
PFDSM3638_10225	1840393	1840599	PF_RS10250	1873389	1873595	PF2029	PFDSM3638_10225	hypothetical protein
PFDSM3638_10230	1840550	1840918	PF_RS10790	1873546	1873914	PF2030	PFDSM3638_10230	hypothetical protein
PFDSM3638_10235	1840884	1841282	PF_RS10260	1873880	1874278	PF2031	PFDSM3638_10235	[Fe-S]-binding protein
PFDSM3638_10240	1841294	1842895	PF_RS10265	1874290	1875891	PF2032	PFDSM3638_10240	sodium:proton antiporter
PFDSM3638_10245	1843138	1844130	PF_RS10270	1876134	1877126	PF2033	PFDSM3638_10245	TIGR01210 family radical SAM protein
PFDSM3638_10250	1844096	1844716	PF_RS10275	1877092	1877712	PF2034	PFDSM3638_10250	hypothetical protein
PFDSM3638_10260	1845541	1846527	PF_RS10290	1879328	1880314	PF2036	corA	magnesium and cobalt transport protein CorA
PFDSM3638_10265	1846561	1847313	PF_RS10295	1880348	1881100	PF2037	PFDSM3638_10265	hypothetical protein
PFDSM3638_10270	1847737	1848045	PF_RS10300	1881524	1881832	-	PFDSM3638_10270	hypothetical protein
PFDSM3638_10275	1848074	1848601	PF_RS10305	1881861	1882388	PF2038	cobO	cob(I)yrinic acid a,c-diamide adenosyltransferase
PFDSM3638_10280	1848598	1849077	PF_RS10310	1882385	1882864	PF2039	PFDSM3638_10280	NYN domain-containing protein
PFDSM3638_10285	1849019	1849570	PF_RS10315	1882806	1883357	PF2040	PFDSM3638_10285	NYN domain-containing protein
PFDSM3638_10290	1849635	1850225	PF_RS10320	1883422	1884012	PF2041	PFDSM3638_10290	molybdenum cofactor guanylyltransferase
PFDSM3638_10295	1850281	1850865	PF_RS10325	1884068	1884652	PF2042	PFDSM3638_10295	hypothetical protein
[truncated: 42 more rows]
