# Supplementary material for: Next Generation DNA-Seq and Differential RNA-Seq Allow Re-annotation of the Pyrococcus furiosus DSM 3638 Genome and Provide Insights Into Archaeal Antisense Transcription
Source: Front Microbiol. 2019 Jul 12;10:1603. doi: 10.3389/fmicb.2019.01603 (PMC6640164; doi:10.3389/fmicb.2019.01603)
Supplement: Supplementary file 4 [file Table_4.XLSX]

## Sheet: Tabelle1
Supplementary Table 4: Operon-mapper output from http://biocomputo.ibt.unam.mx/operon_mapper/ (Taboada et al., 2018). GFF and fasta files from new assembly were used as input.
Operon	IdGene	Type	COGgene	PosLeft	postRight	Strand	Function
1
	PFDSM3638_00005.p01	CDS	COG1474	1	1263	+	[LO] Cdc6-related protein, AAA superfamily ATPase
	PFDSM3638_00010.p01	CDS	COG1311	1263	3104	+	[L] Archaeal DNA polymerase II, small subunit/DNA
	PFDSM3638_00015.p01	CDS	COG1933	3104	6895	+	[L] Archaeal DNA polymerase II, large subunit
	PFDSM3638_00020.p01	CDS	COG2220	6947	7579	+	[R] Predicted Zn-dependent hydrolases of the beta-lactamase
	PFDSM3638_00025.p01	CDS	COG0468	7590	8267	+	[L] RecA/RadA recombinase
2
	PFDSM3638_00030.p01	CDS	COG1530	8264	9673	-	[J] Ribonucleases G and E
	PFDSM3638_00035.p01	CDS	ROG7693	9627	10334	-	NA
3
	PFDSM3638_00040.p01	CDS	COG2379	14577	15917	-	[G] Putative glycerate kinase
4
	PFDSM3638_00045.p01	CDS	COG0121	15972	16763	+	[R] Predicted glutamine amidotransferase
5
	PFDSM3638_00050.p01	CDS	COG1746	16744	18105	-	[J] tRNA nucleotidyltransferase (CCA-adding enzyme)
	PFDSM3638_00055.p01	CDS	COG1514	18310	18864	-	[J] 2'-5' RNA ligase
6
	PFDSM3638_00060.p01	CDS	COG0454	19151	19603	-	[KR] Histone acetyltransferase HPA2 and related acetyltransferases
	PFDSM3638_00065.p01	CDS	ROG5024	19584	21017	-	NA
	PFDSM3638_00070.p01	CDS	COG3367	20998	22095	-	[S] Uncharacterized conserved protein
	PFDSM3638_00075.p01	CDS	COG1171	22098	23000	-	[E] Threonine dehydratase
7
	PFDSM3638_00085.p01	CDS	NA	23500	23784	+	NA
	PFDSM3638_00090.p01	CDS	ROG1105	23760	24035	+	NA
8
	PFDSM3638_00095.p01	CDS	NA	24170	24748	-	NA
9
	PFDSM3638_00100.p01	CDS	COG1131	24874	25842	+	[V] ABC-type multidrug transport system, ATPase component
	PFDSM3638_00105.p01	CDS	COG1682	25829	26620	+	[GM] ABC-type polysaccharide/polyol phosphate export systems, permease
10
	PFDSM3638_00110.p01	CDS	COG1413	26993	28687	-	[C] FOG: HEAT repeat
	PFDSM3638_00115.p01	CDS	COG0491	28684	29274	-	[R] Zn-dependent hydrolases, including glyoxylases
	PFDSM3638_00120.p01	CDS	COG2236	29317	29778	-	[R] Predicted phosphoribosyltransferases
	PFDSM3638_00125.p01	CDS	COG0671	29803	30378	-	[I] Membrane-associated phospholipid phosphatase
	PFDSM3638_00130.p01	CDS	COG1031	30401	32143	-	[C] Uncharacterized Fe-S oxidoreductase
	PFDSM3638_00135.p01	CDS	COG2159	32140	32883	-	[R] Predicted metal-dependent hydrolase of the TIM-barrel
11
	PFDSM3638_00140.p01	CDS	COG0574	32948	35401	-	[G] Phosphoenolpyruvate synthase/pyruvate phosphate dikinase
12
	PFDSM3638_00145.p01	CDS	COG1807	35525	36910	-	[M] 4-amino-4-deoxy-L-arabinose transferase and related glycosyltransferases of
	PFDSM3638_00150.p01	CDS	COG1822	36900	37934	-	[S] Predicted archaeal membrane protein
	PFDSM3638_00155.p01	CDS	COG1822	37921	38889	-	[S] Predicted archaeal membrane protein
	PFDSM3638_00160.p01	CDS	ROG6170	38889	39557	-	NA
13
	PFDSM3638_00165.p01	CDS	COG0603	39613	40335	+	[R] Predicted PP-loop superfamily ATPase
14
	PFDSM3638_00170.p01	CDS	COG0270	40319	41224	-	[L] Site-specific DNA methylase
	PFDSM3638_00175.p01	CDS	COG1761	41225	41512	-	[K] DNA-directed RNA polymerase, subunit L
	PFDSM3638_00180.p01	CDS	COG3286	41472	42131	-	[S] Uncharacterized protein conserved in archaea
	PFDSM3638_00185.p01	CDS	COG1096	42128	42721	-	[J] Predicted RNA-binding protein (consists of S1
	PFDSM3638_00190.p01	CDS	COG1202	42718	45228	-	[R] Superfamily II helicase, archaea-specific
	PFDSM3638_00195.p01	CDS	COG1522	45237	45704	-	[K] Transcriptional regulators
	PFDSM3638_00200.p01	CDS	COG5625	45713	46048	-	[K] Predicted transcription regulator containing HTH domain
15
	PFDSM3638_00205.p01	CDS	COG1917	46111	46479	-	[S] Uncharacterized conserved protein, contains double-stranded beta-helix
16
	PFDSM3638_00210.p01	CDS	COG2234	46551	48203	+	[R] Predicted aminopeptidases
17
	PFDSM3638_00215.p01	CDS	COG0463	48196	49254	-	[M] Glycosyltransferases involved in cell wall biogenesis
	PFDSM3638_00220.p01	CDS	COG1889	49289	49972	-	[J] Fibrillarin-like rRNA methylase
	PFDSM3638_00225.p01	CDS	COG1498	49978	51186	-	[J] Protein implicated in ribosomal biogenesis, Nop56p
18
	PFDSM3638_00230.p01	CDS	COG0307	51252	51803	-	[H] Riboflavin synthase alpha chain
	PFDSM3638_00235.p01	CDS	COG0117	51796	52860	-	[H] Pyrimidine deaminase
	PFDSM3638_00240.p01	CDS	COG0054	52850	53323	-	[H] Riboflavin synthase beta-chain
	PFDSM3638_00245.p01	CDS	COG0807	53320	54483	-	[H] GTP cyclohydrolase II
19
	PFDSM3638_00250.p01	CDS	NA	54600	55232	+	NA
20
	PFDSM3638_00255.p01	CDS	COG0619	55186	55917	-	[P] ABC-type cobalt transport system, permease component
	PFDSM3638_00260.p01	CDS	COG1122	55914	56696	-	[P] ABC-type cobalt transport system, ATPase component
	PFDSM3638_00265.p01	CDS	COG3316	56754	57455	-	[L] Transposase and inactivated derivatives
21
	PFDSM3638_00270.p01	CDS	COG1340	57633	58535	+	[S] Uncharacterized archaeal coiled-coil protein
	PFDSM3638_00275.p01	CDS	COG1549	58541	60253	+	[J] Queuine tRNA-ribosyltransferases, contain PUA domain
22
	PFDSM3638_00280.p01	CDS	NA	60250	61392	-	NA
	PFDSM3638_00285.r01	tRNA	NA	61421	61498	-	NA
	PFDSM3638_00290.r01	tRNA	NA	61506	61582	-	NA
23
	PFDSM3638_00295.p01	CDS	COG2723	61780	63198	-	[G] Beta-glucosidase/6-phospho-beta-glucosidase/beta-galactosidase
24
	PFDSM3638_00300.p01	CDS	COG4221	63374	64078	+	[R] Short-chain alcohol dehydrogenase of unknown specificity
	PFDSM3638_00305.p01	CDS	COG1454	64089	65261	+	[C] Alcohol dehydrogenase, class IV
	PFDSM3638_00310.p01	CDS	COG2273	65274	66167	+	[G] Beta-glucanase/Beta-glucan synthetase
	PFDSM3638_00315.p01	CDS	COG0340	66209	66916	+	[H] Biotin-(acetyl-CoA carboxylase) ligase
25
	PFDSM3638_00320.p01	CDS	COG2074	66899	67807	-	[G] 2-phosphoglycerate kinase
	PFDSM3638_00325.p01	CDS	COG2403	67791	69083	-	[R] Predicted GTPase
26
	PFDSM3638_00330.p01	CDS	COG0725	69225	70244	+	[P] ABC-type molybdate transport system, periplasmic component
	PFDSM3638_00335.p01	CDS	COG0555	70317	71066	+	[O] ABC-type sulfate transport system, permease component
	PFDSM3638_00340.p01	CDS	COG1118	71059	72093	+	[P] ABC-type sulfate/molybdate transport systems, ATPase component
27
	PFDSM3638_00345.p01	CDS	COG1859	72090	72641	-	[J] RNA:NAD 2'-phosphotransferase
	PFDSM3638_00350.p01	CDS	COG1112	72625	76683	-	[L] Superfamily I DNA and RNA helicases
	PFDSM3638_00355.p01	CDS	COG2872	76697	77341	-	[R] Predicted metal-dependent hydrolases related to alanyl-tRNA
28
	PFDSM3638_00360.p01	CDS	COG0517	77397	77807	+	[R] FOG: CBS domain
	PFDSM3638_00365.p01	CDS	COG1409	77814	79319	+	[R] Predicted phosphohydrolases
	PFDSM3638_00370.p01	CDS	COG2520	79324	80325	+	[R] Predicted methyltransferase
	PFDSM3638_00375.p01	CDS	COG2896	80384	81307	+	[H] Molybdenum cofactor biosynthesis enzyme
	PFDSM3638_00380.p01	CDS	ROG7039	81355	82176	+	NA
29
	PFDSM3638_00385.p01	CDS	COG0470	82177	83616	-	[L] ATPase involved in DNA replication
	PFDSM3638_00390.p01	CDS	COG0470	83623	86181	-	[L] ATPase involved in DNA replication
30
	PFDSM3638_00395.p01	CDS	COG3634	86276	86956	-	[O] Alkyl hydroperoxide reductase, large subunit
31
	PFDSM3638_00400.p01	CDS	COG1777	87089	87787	+	[K] Predicted transcriptional regulators
	PFDSM3638_00405.p01	CDS	COG1145	87774	87965	+	[C] Ferredoxin
	PFDSM3638_00410.p01	CDS	COG0644	87962	89143	+	[C] Dehydrogenases (flavoproteins)
32
	PFDSM3638_00415.p01	CDS	COG0171	89127	89900	-	[H] NAD synthase
	PFDSM3638_00420.p01	CDS	COG0457	89897	90847	-	[R] FOG: TPR repeat
33
	PFDSM3638_00425.p01	CDS	COG0314	90902	91339	+	[H] Molybdopterin converting factor, large subunit
34
	PFDSM3638_00430.p01	CDS	COG0641	91433	92347	+	[R] Arylsulfatase regulator (Fe-S oxidoreductase)
35
	PFDSM3638_00435.p01	CDS	COG0467	92479	93225	+	[T] RecA-superfamily ATPases implicated in signal transduction
36
	PFDSM3638_00445.p01	CDS	NA	94040	95194	+	NA
	PFDSM3638_00450.p01	CDS	COG1784	95173	96294	+	[S] Predicted membrane protein
	PFDSM3638_00455.p01	CDS	ROG3963	96327	96914	+	NA
	PFDSM3638_00460.p01	CDS	COG0235	96901	97470	+	[G] Ribulose-5-phosphate 4-epimerase and related epimerases and
37
	PFDSM3638_00470.p01	CDS	COG0697	97800	98645	-	[GER] Permeases of the drug/metabolite transporter (DMT)
	PFDSM3638_00475.p01	CDS	COG1467	98638	99681	-	[L] Eukaryotic-type DNA primase, catalytic (small) subunit
	PFDSM3638_00480.p01	CDS	COG2219	99632	100822	-	[L] Eukaryotic-type DNA primase, large subunit
38
	PFDSM3638_00485.p01	CDS	COG1341	100872	101936	+	[R] Predicted GTPase or GTP-binding protein
39
	PFDSM3638_00490.p01	CDS	COG1497	101999	102466	+	[K] Predicted transcriptional regulator
40
	PFDSM3638_00495.p01	CDS	COG0218	102438	103010	-	[R] Predicted GTPase
41
	PFDSM3638_00500.p01	CDS	COG1222	103073	104263	-	[O] ATP-dependent 26S proteasome regulatory subunit
42
	PFDSM3638_00505.p01	CDS	COG3839	104347	105441	-	[G] ABC-type sugar transport systems, ATPase components
	PFDSM3638_00510.p01	CDS	COG3833	105453	106322	-	[G] ABC-type maltose transport systems, permease component
	PFDSM3638_00515.p01	CDS	COG1175	106319	107266	-	[G] ABC-type sugar transport systems, permease components
	PFDSM3638_00520.p01	CDS	COG2182	107267	108892	-	[G] Maltose-binding periplasmic proteins/domains
43
	PFDSM3638_00525.p01	CDS	ROG5414	109388	110422	+	NA
44
	PFDSM3638_00530.p01	CDS	COG1167	110433	111674	-	[KE] Transcriptional regulators containing a DNA-binding HTH
45
	PFDSM3638_00535.p01	CDS	COG1184	111985	112950	-	[J] Translation initiation factor 2B subunit, eIF-2B
	PFDSM3638_00540.p01	CDS	COG1255	112947	113345	-	[S] Uncharacterized protein conserved in archaea
46
	PFDSM3638_00545.p01	CDS	COG1378	113463	114488	+	[K] Predicted transcriptional regulators
47
	PFDSM3638_00550.p01	CDS	COG1873	114472	114705	-	[S] Uncharacterized conserved protein
48
	PFDSM3638_00555.p01	CDS	COG1061	114817	116151	+	[KL] DNA or RNA helicases of superfamily
49
	PFDSM3638_00560.p01	CDS	COG0421	116139	116984	-	[E] Spermidine synthase
50
	PFDSM3638_00565.p01	CDS	ROG3209	117071	118270	+	NA
	PFDSM3638_00570.p01	CDS	COG1988	118267	118779	+	[R] Predicted membrane-bound metal-dependent hydrolases
51
	PFDSM3638_00575.p01	CDS	COG2095	118766	119374	-	[U] Multiple antibiotic transporter
52
	PFDSM3638_00580.p01	CDS	COG5608	119394	120338	+	[S] Conserved secreted protein
53
	PFDSM3638_00585.r01	rRNA	NA	120675	122193	+	NA
	PFDSM3638_00590.r01	tRNA	NA	122243	122320	+	NA
	PFDSM3638_00595.r01	rRNA	NA	122451	125351	+	NA
54
	PFDSM3638_00600.p01	CDS	COG4697	125606	127072	+	[S] Uncharacterized protein conserved in archaea
	PFDSM3638_00605.p01	CDS	COG2029	127078	127644	+	[S] Uncharacterized conserved protein
55
	PFDSM3638_00610.p01	CDS	ROG0628	127638	128246	-	NA
56
	PFDSM3638_00615.p01	CDS	COG1384	128361	129932	+	[J] Lysyl-tRNA synthetase (class I)
	PFDSM3638_00620.p01	CDS	ROG6083	129938	130840	+	NA
57
	PFDSM3638_00625.p01	CDS	COG0500	130811	131497	-	[QR] SAM-dependent methyltransferases
58
	PFDSM3638_00630.p01	CDS	COG1633	131564	132535	+	[S] Uncharacterized conserved protein
	PFDSM3638_00635.p01	CDS	COG1014	132606	133205	+	[C] Pyruvate:ferredoxin oxidoreductase and related 2-oxoacid:ferredoxin oxidoreductases,
59
	PFDSM3638_00640.p01	CDS	COG0477	133180	134343	-	[GEPR] Permeases of the major facilitator superfamily
60
	PFDSM3638_00645.p01	CDS	COG0704	134432	135349	+	[P] Phosphate uptake regulator
	PFDSM3638_00650.p01	CDS	COG1446	135402	136322	+	[E] Asparaginase
	PFDSM3638_00655.p01	CDS	ROG2472	136322	137485	+	NA
	PFDSM3638_00660.p01	CDS	COG2516	137475	138404	+	[R] Biotin synthase-related enzyme
	PFDSM3638_00665.p01	CDS	COG1720	138406	139020	+	[S] Uncharacterized conserved protein
61
	PFDSM3638_00670.p01	CDS	COG3273	139017	139607	-	[S] Uncharacterized conserved protein
	PFDSM3638_00675.p01	CDS	COG3273	139594	140211	-	[S] Uncharacterized conserved protein
62
	PFDSM3638_00680.p01	CDS	COG3371	140403	140975	-	[S] Predicted membrane protein
	PFDSM3638_00685.p01	CDS	COG1028	140990	141781	-	[IQR] Dehydrogenases with different specificities (related to
63
	PFDSM3638_00690.p01	CDS	COG1293	141846	142460	+	[K] Predicted RNA-binding protein homologous to eukaryotic
	PFDSM3638_00695.p01	CDS	NA	142457	143248	+	NA
64
	PFDSM3638_00700.p01	CDS	COG2013	143245	143904	-	[S] Uncharacterized conserved protein
	PFDSM3638_00705.p01	CDS	COG0152	143940	144644	-	[F] Phosphoribosylaminoimidazolesuccinocarboxamide (SAICAR) synthase
65
	PFDSM3638_00710.p01	CDS	COG0034	144736	146064	+	[F] Glutamine phosphoribosylpyrophosphate amidotransferase
66
	PFDSM3638_00715.p01	CDS	COG0017	146234	147538	-	[J] Aspartyl/asparaginyl-tRNA synthetases
67
	PFDSM3638_00730.p01	CDS	COG0449	150764	152560	-	[M] Glucosamine 6-phosphate synthetase, contains amidotransferase and
68
	PFDSM3638_00735.p01	CDS	ROG3168	152638	153687	-	NA
	PFDSM3638_00740.p01	CDS	COG0638	153684	154274	-	[O] 20S proteasome, alpha and beta subunits
69
	PFDSM3638_00745.p01	CDS	COG0312	154349	155722	+	[R] Predicted Zn-dependent proteases and their inactivated
	PFDSM3638_00750.p01	CDS	COG0312	155719	156981	+	[R] Predicted Zn-dependent proteases and their inactivated
	PFDSM3638_00755.p01	CDS	NA	157032	157598	+	NA
70
	PFDSM3638_00760.p01	CDS	COG3601	157601	158311	-	[S] Predicted membrane protein
71
	PFDSM3638_00765.p01	CDS	COG0520	158310	159515	+	[E] Selenocysteine lyase
72
	PFDSM3638_00770.p01	CDS	COG1011	159499	160191	-	[R] Predicted hydrolase (HAD superfamily)
	PFDSM3638_00775.p01	CDS	COG1611	160188	160703	-	[R] Predicted Rossmann fold nucleotide-binding protein
	PFDSM3638_00780.p01	CDS	COG0750	160703	161812	-	[M] Predicted membrane-associated Zn-dependent proteases 1
73
	PFDSM3638_00785.p01	CDS	NA	161904	162407	+	NA
	PFDSM3638_00790.p01	CDS	COG0144	162404	163564	+	[J] tRNA and rRNA cytosine-C5-methylases
	PFDSM3638_00795.p01	CDS	COG0392	163561	164559	+	[S] Predicted integral membrane protein
74
	PFDSM3638_00800.p01	CDS	ROG7039	164556	165071	-	NA
75
	PFDSM3638_00805.p01	CDS	COG0533	165279	166253	-	[O] Metal-dependent proteases with possible chaperone activity
76
	PFDSM3638_00810.p01	CDS	COG0341	166353	167243	+	[U] Preprotein translocase subunit SecF
	PFDSM3638_00815.p01	CDS	COG0341	167240	168757	+	[U] Preprotein translocase subunit SecF
	PFDSM3638_00820.p01	CDS	COG0569	168763	169455	+	[P] K+ transport systems, NAD-binding component
77
	PFDSM3638_00825.p01	CDS	COG2811	169548	169859	+	[C] Archaeal/vacuolar-type H+-ATPase subunit H
	PFDSM3638_00830.p01	CDS	COG1269	169861	171852	+	[C] Archaeal/vacuolar-type H+-ATPase subunit I
	PFDSM3638_00835.p01	CDS	COG0636	171854	172333	+	[C] F0F1-type ATP synthase, subunit c/Archaeal/vacuolar-type H+-ATPase,
	PFDSM3638_00840.p01	CDS	COG1390	172368	172964	+	[C] Archaeal/vacuolar-type H+-ATPase subunit E
	PFDSM3638_00845.p01	CDS	COG1527	172971	174083	+	[C] Archaeal/vacuolar-type H+-ATPase subunit C
	PFDSM3638_00850.p01	CDS	COG1436	174080	174391	+	[C] Archaeal/vacuolar-type H+-ATPase subunit F
	PFDSM3638_00855.p01	CDS	COG1155	174398	177439	+	[C] Archaeal/vacuolar-type H+-ATPase subunit A
	PFDSM3638_00860.p01	CDS	COG1156	177445	178833	+	[C] Archaeal/vacuolar-type H+-ATPase subunit B
	PFDSM3638_00865.p01	CDS	COG1394	178864	179508	+	[C] Archaeal/vacuolar-type H+-ATPase subunit D
	PFDSM3638_00870.p01	CDS	COG2872	179540	180754	+	[R] Predicted metal-dependent hydrolases related to alanyl-tRNA
78
	PFDSM3638_00875.p01	CDS	COG1365	180729	181556	-	[R] Predicted ATPase (PP-loop superfamily)
79
	PFDSM3638_00880.p01	CDS	COG0731	181622	182530	-	[C] Fe-S oxidoreductases
	PFDSM3638_00885.p01	CDS	COG0543	182541	183284	-	[HC] 2-polyprenylphenol hydroxylase and related flavodoxin oxidoreductases
	PFDSM3638_00890.p01	CDS	COG0044	183232	184476	-	[F] Dihydroorotase and related cyclic amidohydrolases
80
	PFDSM3638_00895.p01	CDS	COG3889	184789	187278	+	[R] Predicted solute binding protein
81
	PFDSM3638_00900.p01	CDS	COG0601	187466	188515	+	[EP] ABC-type dipeptide/oligopeptide/nickel transport systems, permease components
	PFDSM3638_00905.p01	CDS	COG1173	188526	189950	+	[EP] ABC-type dipeptide/oligopeptide/nickel transport systems, permease components
	PFDSM3638_00910.p01	CDS	COG0444	189961	190920	+	[EP] ABC-type dipeptide/oligopeptide/nickel transport system, ATPase component
	PFDSM3638_00915.p01	CDS	COG4608	190931	191938	+	[E] ABC-type oligopeptide transport system, ATPase component
	PFDSM3638_00920.p01	CDS	NA	191950	192456	+	NA
	PFDSM3638_00925.p01	CDS	COG2140	192449	193018	+	[GR] Thermophilic glucose-6-phosphate isomerase and related metalloenzymes
82
	PFDSM3638_00930.p01	CDS	COG1828	193086	193325	+	[F] Phosphoribosylformylglycinamidine (FGAM) synthase, PurS component
	PFDSM3638_00935.p01	CDS	COG0047	193331	194002	+	[F] Phosphoribosylformylglycinamidine (FGAM) synthase, glutamine amidotransferase domain
	PFDSM3638_00940.p01	CDS	COG0046	194111	196225	+	[F] Phosphoribosylformylglycinamidine (FGAM) synthase, synthetase domain
83
	PFDSM3638_00945.p01	CDS	COG0063	196389	197831	-	[G] Predicted sugar kinase
	PFDSM3638_00950.p01	CDS	COG1048	197874	200369	-	[C] Aconitase A
	PFDSM3638_00955.p01	CDS	COG0538	200374	201576	-	[C] Isocitrate dehydrogenases
	PFDSM3638_00960.p01	CDS	COG0372	201582	202715	-	[C] Citrate synthase
84
	PFDSM3638_00965.p01	CDS	COG0067	203072	204181	+	[E] Glutamate synthase domain 1
	PFDSM3638_00970.p01	CDS	COG0069	204178	205686	+	[E] Glutamate synthase domain 2
	PFDSM3638_00975.p01	CDS	COG2218	205683	206510	+	[C] Formylmethanofuran dehydrogenase subunit C
85
	PFDSM3638_00980.p01	CDS	COG0137	206599	207831	+	[E] Argininosuccinate synthase
	PFDSM3638_00985.p01	CDS	COG0165	207845	209224	+	[E] Argininosuccinate lyase
	PFDSM3638_00990.p01	CDS	COG0189	209193	210014	+	[HJ] Glutathione synthase/Ribosomal protein S6 modification enzyme
86
	PFDSM3638_00995.p01	CDS	COG1032	210011	211615	-	[C] Fe-S oxidoreductase
87
	PFDSM3638_01000.p01	CDS	COG2263	211759	212373	+	[J] Predicted RNA methylase
88
	PFDSM3638_01005.p01	CDS	COG0417	212360	214687	-	[L] DNA polymerase elongation subunit (family B)
89
	PFDSM3638_01010.p01	CDS	COG1234	214788	215600	+	[R] Metal-dependent hydrolases of the beta-lactamase superfamily
90
	PFDSM3638_01015.p01	CDS	COG1365	215597	216337	-	[R] Predicted ATPase (PP-loop superfamily)
	PFDSM3638_01020.p01	CDS	COG0148	216375	217667	-	[G] Enolase
	PFDSM3638_01025.p01	CDS	COG0424	217702	218274	-	[D] Nucleotide-binding protein implicated in inhibition of
91
	PFDSM3638_01030.p01	CDS	COG1631	218400	218684	+	[J] Ribosomal protein L44E
	PFDSM3638_01035.p01	CDS	COG2051	218689	218880	+	[J] Ribosomal protein S27E
92
	PFDSM3638_01040.p01	CDS	COG0720	218855	219310	-	[H] 6-pyruvoyl-tetrahydropterin synthase
93
	PFDSM3638_01045.p01	CDS	COG0269	219388	220608	+	[G] 3-hexulose-6-phosphate synthase and related proteins
94
	PFDSM3638_01050.p01	CDS	NA	220699	221388	+	NA
	PFDSM3638_01055.p01	CDS	COG1011	221382	222041	+	[R] Predicted hydrolase (HAD superfamily)
	PFDSM3638_01060.p01	CDS	NA	222025	222207	+	NA
	PFDSM3638_01065.p01	CDS	ROG2633	222204	222992	+	NA
95
	PFDSM3638_01070.p01	CDS	COG1418	222985	223599	-	[R] Predicted HD superfamily hydrolase
96
	PFDSM3638_01075.p01	CDS	COG0454	223649	224131	+	[KR] Histone acetyltransferase HPA2 and related acetyltransferases
	PFDSM3638_01080.r01	tRNA	NA	224160	224236	+	NA
97
	PFDSM3638_01085.p01	CDS	COG5427	224691	226310	-	[S] Uncharacterized membrane protein
98
	PFDSM3638_01090.p01	CDS	COG0640	226401	226979	+	[K] Predicted transcriptional regulators
	PFDSM3638_01095.p01	CDS	COG1888	226988	227293	+	[S] Uncharacterized protein conserved in archaea
	PFDSM3638_01100.p01	CDS	COG0640	227293	227856	+	[K] Predicted transcriptional regulators
99
	PFDSM3638_01105.p01	CDS	COG1042	227916	229313	+	[C] Acyl-CoA synthetase (NDP forming)
100
	PFDSM3638_01110.p01	CDS	ROG7039	229299	230372	-	NA
	PFDSM3638_01115.p01	CDS	COG1208	230369	231631	-	[MJ] Nucleoside-diphosphate-sugar pyrophosphorylase involved in lipopolysaccharide biosynthesis/translation
101
	PFDSM3638_01120.p01	CDS	COG0462	231684	232523	-	[FE] Phosphoribosylpyrophosphate synthetase
	PFDSM3638_01125.p01	CDS	COG4089	232536	233231	-	[S] Predicted membrane protein
	PFDSM3638_01130.p01	CDS	ROG3523	233228	233581	-	NA
	PFDSM3638_01135.p01	CDS	COG1698	233633	233893	-	[S] Uncharacterized protein conserved in archaea
102
	PFDSM3638_01140.p01	CDS	COG1030	234632	235474	+	[O] Membrane-bound serine protease (ClpP class)
103
	PFDSM3638_01145.p01	CDS	COG0180	235543	236700	-	[J] Tryptophanyl-tRNA synthetase
104
	PFDSM3638_01155.p01	CDS	COG1373	237474	238667	-	[R] Predicted ATPase (AAA+ superfamily)
105
	PFDSM3638_01160.p01	CDS	COG2250	238901	239107	+	[S] Uncharacterized conserved protein related to C-terminal
106
	PFDSM3638_01165.p01	CDS	NA	239516	239827	+	NA
107
	PFDSM3638_01170.p01	CDS	NA	239820	240749	-	NA
108
	PFDSM3638_01175.p01	CDS	COG1839	240903	241391	+	[S] Uncharacterized conserved protein
	PFDSM3638_01180.p01	CDS	COG0127	241403	241960	+	[F] Xanthosine triphosphate pyrophosphatase
	PFDSM3638_01185.p01	CDS	COG1522	241992	242444	+	[K] Transcriptional regulators
109
	PFDSM3638_01190.p01	CDS	COG1092	242800	243996	+	[R] Predicted SAM-dependent methyltransferases
110
	PFDSM3638_01195.p01	CDS	COG1998	246153	246305	-	[J] Ribosomal protein S27AE
	PFDSM3638_01200.p01	CDS	COG2004	246308	246607	-	[J] Ribosomal protein S24E
	PFDSM3638_01205.p01	CDS	COG1909	246597	247130	-	[S] Uncharacterized protein conserved in archaea
	PFDSM3638_01210.p01	CDS	COG2093	247130	247315	-	[K] DNA-directed RNA polymerase, subunit E''
	PFDSM3638_01215.p01	CDS	COG1095	247312	247881	-	[K] DNA-directed RNA polymerase, subunit E'
	PFDSM3638_01220.p01	CDS	COG0221	247920	248456	-	[C] Inorganic pyrophosphatase
	PFDSM3638_01225.p01	CDS	COG0648	248526	249371	-	[L] Endonuclease IV
111
	PFDSM3638_01230.p01	CDS	COG0011	249443	249745	+	[S] Uncharacterized conserved protein
	PFDSM3638_01235.p01	CDS	COG2237	249742	250872	+	[S] Predicted membrane protein
112
	PFDSM3638_01240.p01	CDS	COG1361	250864	253635	-	[M] S-layer domain
	PFDSM3638_01245.p01	CDS	COG1033	253622	255868	-	[R] Predicted exporters of the RND superfamily
113
	PFDSM3638_01250.p01	CDS	COG1510	255942	256460	+	[K] Predicted transcriptional regulators
114
	PFDSM3638_01255.p01	CDS	COG0124	256530	257828	-	[J] Histidyl-tRNA synthetase
115
	PFDSM3638_01260.p01	CDS	COG0156	257932	259119	+	[H] 7-keto-8-aminopelargonate synthetase and related enzymes
116
	PFDSM3638_01265.p01	CDS	COG1676	259834	260346	-	[J] tRNA splicing endonuclease
	PFDSM3638_01270.p01	CDS	COG0456	260343	260855	-	[R] Acetyltransferases
117
	PFDSM3638_01275.p01	CDS	ROG1113	260948	262075	+	NA
118
	PFDSM3638_01280.p01	CDS	ROG7607	262169	262435	+	NA
	PFDSM3638_01285.p01	CDS	COG0013	262481	265225	+	[J] Alanyl-tRNA synthetase
119
	PFDSM3638_01290.p01	CDS	NA	265230	265691	-	NA
120
	PFDSM3638_01295.p01	CDS	COG1449	265804	267753	+	[G] Alpha-amylase/alpha-mannosidase
121
	PFDSM3638_01300.p01	CDS	COG0037	267804	268655	-	[D] Predicted ATPase of the PP-loop superfamily
122
	PFDSM3638_01305.p01	CDS	COG0475	268818	269957	+	[P] Kef-type K+ transport systems, membrane components
123
	PFDSM3638_01310.p01	CDS	COG2509	269958	271409	-	[R] Uncharacterized FAD-dependent dehydrogenases
	PFDSM3638_01315.p01	CDS	ROG1327	271455	273611	-	NA
	PFDSM3638_01320.p01	CDS	COG1277	273615	274403	-	[R] ABC-type transport system involved in multi-copper
	PFDSM3638_01325.p01	CDS	COG1131	274396	275334	-	[V] ABC-type multidrug transport system, ATPase component
	PFDSM3638_01330.p01	CDS	COG4710	275372	275686	-	[R] Predicted DNA-binding protein with an HTH
	PFDSM3638_01335.p01	CDS	ROG8481	275728	276114	-	NA
124
	PFDSM3638_01340.p01	CDS	COG2129	276209	276850	+	[R] Predicted phosphoesterases, related to the Icc
	PFDSM3638_01345.p01	CDS	COG1254	276885	277160	+	[C] Acylphosphatases
125
	PFDSM3638_01350.p01	CDS	COG2150	277150	277731	-	[R] Predicted regulator of amino acid metabolism,
126
	PFDSM3638_01355.p01	CDS	COG0516	277841	279298	+	[F] IMP dehydrogenase/GMP reductase
127
	PFDSM3638_01360.p01	CDS	COG3780	279451	280269	+	[L] DNA endonuclease related to intein-encoded endonucleases
128
	PFDSM3638_01365.r01	tRNA	NA	280297	280374	-	NA
129
	PFDSM3638_01370.p01	CDS	COG1404	280593	284789	+	[O] Subtilisin-like serine proteases
130
	PFDSM3638_01375.p01	CDS	COG2151	284815	285336	-	[R] Predicted metal-sulfur cluster biosynthetic enzyme
131
	PFDSM3638_01380.p01	CDS	COG1274	285471	287345	+	[C] Phosphoenolpyruvate carboxykinase (GTP)
132
	PFDSM3638_01385.p01	CDS	COG0525	287350	290025	-	[J] Valyl-tRNA synthetase
	PFDSM3638_01390.p01	CDS	COG0077	290184	290984	-	[E] Prephenate dehydratase
	PFDSM3638_01395.p01	CDS	COG1899	291024	292034	-	[O] Deoxyhypusine synthase
	PFDSM3638_01400.p01	CDS	COG0079	292050	293006	-	[E] Histidinol-phosphate/aromatic aminotransferase and cobyric acid decarboxylase
	PFDSM3638_01405.p01	CDS	COG1267	293003	293428	-	[I] Phosphatidylglycerophosphatase A and related proteins
	PFDSM3638_01410.p01	CDS	COG2102	293376	294071	-	[R] Predicted ATPases of PP-loop superfamily
	PFDSM3638_01415.p01	CDS	COG1270	294075	294932	-	[H] Cobalamin biosynthesis protein CobD/CbiB
133
	PFDSM3638_01420.p01	CDS	COG2238	297297	297719	+	[J] Ribosomal protein S19E (S16A)
	PFDSM3638_01425.p01	CDS	ROG7983	297776	298246	+	NA
	PFDSM3638_01430.p01	CDS	ROG4712	298243	298503	+	NA
	PFDSM3638_01435.p01	CDS	COG0368	298463	299149	+	[H] Cobalamin-5-phosphate synthase
	PFDSM3638_01440.p01	CDS	COG2266	299146	299697	+	[H] GTP:adenosylcobinamide-phosphate guanylyltransferase
134
	PFDSM3638_01445.p01	CDS	COG1492	299675	301126	-	[H] Cobyric acid synthase
	PFDSM3638_01450.p01	CDS	COG1180	301130	301984	-	[O] Pyruvate-formate lyase-activating enzyme
135
	PFDSM3638_01455.p01	CDS	COG2038	301896	302891	+	[H] NaMN:DMB phosphoribosyltransferase
136
	PFDSM3638_01460.p01	CDS	COG1672	302925	304253	-	[R] Predicted ATPase (AAA+ superfamily)
137
	PFDSM3638_01465.p01	CDS	COG1865	304425	305006	-	[S] Uncharacterized conserved protein
	PFDSM3638_01470.p01	CDS	COG0009	305008	306033	-	[J] Putative translation factor (SUA5)
	PFDSM3638_01475.p01	CDS	COG0438	306030	307040	-	[M] Glycosyltransferase
138
	PFDSM3638_01480.p01	CDS	COG0104	307167	308186	+	[F] Adenylosuccinate synthase
139
	PFDSM3638_01485.r01	tRNA	NA	308247	308324	-	NA
	PFDSM3638_01490.p01	CDS	COG1668	308376	309653	-	[CP] ABC-type Na+ efflux pump, permease component
	PFDSM3638_01495.p01	CDS	COG1131	309646	310383	-	[V] ABC-type multidrug transport system, ATPase component
	PFDSM3638_01500.p01	CDS	NA	310380	310730	-	NA
140
	PFDSM3638_01505.p01	CDS	COG4809	310797	312164	-	[G] Archaeal ADP-dependent phosphofructokinase/glucokinase
141
	PFDSM3638_01510.p01	CDS	ROG1409	312265	312729	-	NA
	PFDSM3638_01515.p01	CDS	COG1772	312714	313292	-	[S] Uncharacterized protein conserved in archaea
142
	PFDSM3638_01520.p01	CDS	COG1722	313327	314379	+	[L] Exonuclease VII small subunit
	PFDSM3638_01525.p01	CDS	COG0697	314376	315218	+	[GER] Permeases of the drug/metabolite transporter (DMT)
	PFDSM3638_01530.p01	CDS	COG1506	315252	317114	+	[E] Dipeptidyl aminopeptidases/acylaminoacyl-peptidases
143
	PFDSM3638_01540.p01	CDS	COG1052	317162	318172	-	[CHR] Lactate dehydrogenase and related dehydrogenases
144
	PFDSM3638_01545.p01	CDS	COG3947	318220	319197	+	[T] Response regulator containing CheY-like receiver and
145
	PFDSM3638_01550.p01	CDS	COG0517	319169	320347	-	[R] FOG: CBS domain
146
	PFDSM3638_01555.p01	CDS	COG0864	320448	320864	-	[K] Predicted transcriptional regulators containing the CopG/Arc/MetJ
	PFDSM3638_01560.r01	tRNA	NA	320913	321000	-	NA
	PFDSM3638_01565.r01	tRNA	NA	321065	321140	-	NA
147
	PFDSM3638_01570.p01	CDS	ROG5861	321340	321780	+	NA
148
	PFDSM3638_01575.p01	CDS	ROG7393	321875	322480	+	NA
	PFDSM3638_01580.p01	CDS	ROG5133	322497	323030	+	NA
	PFDSM3638_01585.p01	CDS	ROG1409	323047	324042	+	NA
	PFDSM3638_01590.p01	CDS	ROG5133	324039	324422	+	NA
	PFDSM3638_01595.p01	CDS	ROG8237	324409	325332	+	NA
149
	PFDSM3638_01600.p01	CDS	ROG6344	325280	327244	-	NA
	PFDSM3638_01605.p01	CDS	COG1955	327250	328956	-	[NU] Archaeal flagella assembly protein J
	PFDSM3638_01610.p01	CDS	COG0630	328968	330581	-	[NU] Type IV secretory pathway, VirB11 components,
	PFDSM3638_01615.p01	CDS	COG2874	330602	331300	-	[NU] Predicted ATPases involved in biogenesis of
	PFDSM3638_01620.p01	CDS	COG3354	331327	331809	-	[N] Putative archaeal flagellar protein G
	PFDSM3638_01625.p01	CDS	COG3353	331809	332327	-	[N] Putative archaeal flagellar protein F
	PFDSM3638_01630.p01	CDS	COG3351	332345	333553	-	[N] Putative archaeal flagellar protein D/E
	PFDSM3638_01635.p01	CDS	COG3352	333557	334033	-	[N] Putative archaeal flagellar protein C
	PFDSM3638_01640.p01	CDS	COG1681	334044	334838	-	[N] Archaeal flagellins
	PFDSM3638_01645.p01	CDS	COG1681	334848	335492	-	[N] Archaeal flagellins
	PFDSM3638_01650.p01	CDS	COG1681	335554	336192	-	[N] Archaeal flagellins
150
	PFDSM3638_01655.p01	CDS	COG0500	336341	337291	-	[QR] SAM-dependent methyltransferases
	PFDSM3638_01660.p01	CDS	COG3373	337304	337630	-	[S] Uncharacterized protein conserved in archaea
151
	PFDSM3638_01665.p01	CDS	ROG5791	337825	338793	+	NA
152
	PFDSM3638_01670.p01	CDS	ROG2993	338765	339514	-	NA
	PFDSM3638_01675.p01	CDS	COG0499	339552	340817	-	[H] S-adenosylhomocysteine hydrolase
	PFDSM3638_01680.p01	CDS	COG0535	340858	341991	-	[R] Predicted Fe-S oxidoreductases
	PFDSM3638_01685.p01	CDS	COG1977	341993	342241	-	[H] Molybdopterin converting factor, small subunit
	PFDSM3638_01690.p01	CDS	COG2414	342290	344107	-	[C] Aldehyde:ferredoxin oxidoreductase
153
	PFDSM3638_01695.p01	CDS	NA	344302	345096	+	NA
154
	PFDSM3638_01700.r01	tRNA	NA	345075	345152	-	NA
	PFDSM3638_01705.r01	tRNA	NA	345259	345336	-	NA
155
	PFDSM3638_01710.p01	CDS	COG3316	345400	346101	-	[L] Transposase and inactivated derivatives
156
	PFDSM3638_01715.p01	CDS	NA	346248	347156	+	NA
157
	PFDSM3638_01720.p01	CDS	COG0662	347153	347491	-	[G] Mannose-6-phosphate isomerase
	PFDSM3638_01725.p01	CDS	COG2517	347495	348220	-	[R] Predicted RNA-binding protein containing a C-terminal
	PFDSM3638_01730.p01	CDS	ROG1214	348226	348552	-	NA
	PFDSM3638_01735.p01	CDS	COG0618	348557	349549	-	[R] Exopolyphosphatase-related proteins
	PFDSM3638_01740.p01	CDS	COG1283	349506	349841	-	[P] Na+/phosphate symporter
	PFDSM3638_01745.p01	CDS	COG1382	349878	350231	-	[O] Prefoldin, chaperonin cofactor
	PFDSM3638_01750.p01	CDS	NA	350266	351186	-	NA
	PFDSM3638_01755.p01	CDS	NA	351235	351963	-	NA
158
	PFDSM3638_01760.p01	CDS	COG2167	352090	352245	+	[J] Ribosomal protein L39E
	PFDSM3638_01765.p01	CDS	COG2097	352256	352543	+	[J] Ribosomal protein L31E
	PFDSM3638_01770.p01	CDS	COG1976	352570	353253	+	[J] Translation initiation factor 6 (eIF-6)
	PFDSM3638_01775.p01	CDS	COG2157	353267	353500	+	[J] Ribosomal protein L20A (L18A)
	PFDSM3638_01780.p01	CDS	COG1730	353525	353965	+	[O] Predicted prefoldin, molecular chaperone implicated in
159
	PFDSM3638_01785.p01	CDS	COG0012	353979	355172	-	[J] Predicted GTPase, probable translation factor
	PFDSM3638_01790.p01	CDS	COG0803	355221	356198	-	[P] ABC-type metal ion transport system, periplasmic
	PFDSM3638_01795.p01	CDS	COG0521	356247	356756	-	[H] Molybdopterin biosynthesis enzymes
160
	PFDSM3638_01800.p01	CDS	COG0733	356907	358190	-	[R] Na+-dependent transporters of the SNF family
161
	PFDSM3638_01805.p01	CDS	COG1052	358390	359391	+	[CHR] Lactate dehydrogenase and related dehydrogenases
	PFDSM3638_01810.p01	CDS	COG1363	359405	360403	+	[G] Cellulase M and related proteins
	PFDSM3638_01815.p01	CDS	COG0730	360415	361170	+	[R] Predicted permeases
	PFDSM3638_01820.p01	CDS	COG1365	361180	361980	+	[R] Predicted ATPase (PP-loop superfamily)
	PFDSM3638_01825.p01	CDS	COG0237	361977	362549	+	[H] Dephospho-CoA kinase
162
	PFDSM3638_01830.p01	CDS	ROG7039	362535	363449	-	NA
163
	PFDSM3638_01835.p01	CDS	COG0478	363652	364587	+	[T] RIO-like serine/threonine protein kinase fused to
164
	PFDSM3638_01840.p01	CDS	COG1874	364584	366917	-	[G] Beta-galactosidase
	PFDSM3638_01845.p01	CDS	COG2222	366920	367897	-	[M] Predicted phosphosugar isomerases
	PFDSM3638_01850.p01	CDS	COG1123	367894	368859	-	[R] ATPase components of various ABC-type transport
	PFDSM3638_01855.p01	CDS	COG0444	368852	369826	-	[EP] ABC-type dipeptide/oligopeptide/nickel transport system, ATPase component
	PFDSM3638_01860.p01	CDS	COG1173	369823	370737	-	[EP] ABC-type dipeptide/oligopeptide/nickel transport systems, permease components
	PFDSM3638_01865.p01	CDS	COG0601	370741	371733	-	[EP] ABC-type dipeptide/oligopeptide/nickel transport systems, permease components
	PFDSM3638_01870.p01	CDS	COG0747	371772	373664	-	[E] ABC-type dipeptide transport system, periplasmic component
165
	PFDSM3638_01875.p01	CDS	COG2723	373841	375292	+	[G] Beta-glucosidase/6-phospho-beta-glucosidase/beta-galactosidase
	PFDSM3638_01880.p01	CDS	ROG5809	375289	375498	+	NA
	PFDSM3638_01885.p01	CDS	COG1487	375501	375950	+	[R] Predicted nucleic acid-binding protein, contains PIN
166
	PFDSM3638_01890.p01	CDS	COG2120	375943	376746	-	[S] Uncharacterized proteins, LmbE homologs
167
	PFDSM3638_01895.p01	CDS	COG1423	376872	378011	+	[L] ATP-dependent DNA ligase, homolog of eukaryotic
168
	PFDSM3638_01900.p01	CDS	COG1367	378191	379525	+	[L] Uncharacterized protein predicted to be involved
169
	PFDSM3638_01905.p01	CDS	COG0530	379766	380710	+	[P] Ca2+/Na+ antiporter
	PFDSM3638_01910.p01	CDS	COG1773	380714	381400	+	[C] Rubredoxin
170
	PFDSM3638_01915.r01	tRNA	NA	381543	381618	+	NA
	PFDSM3638_01920.p01	CDS	COG1679	381677	382834	+	[S] Uncharacterized conserved protein
	PFDSM3638_01925.p01	CDS	COG1786	382834	383238	+	[S] Uncharacterized conserved protein
	PFDSM3638_01930.p01	CDS	COG3877	383192	384445	+	[S] Uncharacterized protein conserved in bacteria
171
	PFDSM3638_01935.p01	CDS	COG1583	384516	385241	+	[L] Uncharacterized protein predicted to be involved
172
	PFDSM3638_01940.p01	CDS	COG0472	385225	386121	-	[M] UDP-N-acetylmuramyl pentapeptide phosphotransferase/UDP-N-acetylglucosamine-1-phosphate transferase
	PFDSM3638_01945.p01	CDS	COG1896	386111	386641	-	[R] Predicted hydrolases of HD superfamily
	PFDSM3638_01950.p01	CDS	ROG6082	386652	386963	-	NA
173
	PFDSM3638_01955.p01	CDS	COG1159	387022	387582	+	[R] GTPase
174
	PFDSM3638_01960.p01	CDS	COG0575	387583	388086	-	[I] CDP-diglyceride synthetase
	PFDSM3638_01965.p01	CDS	COG1107	388088	390310	-	[L] Archaea-specific RecJ-like exonuclease, contains DnaJ-type Zn
	PFDSM3638_01970.p01	CDS	COG1041	390323	391312	-	[L] Predicted DNA modification methylase
	PFDSM3638_01975.p01	CDS	ROG8181	391348	391926	-	NA
175
	PFDSM3638_01980.p01	CDS	COG0451	392047	392997	-	[MG] Nucleoside-diphosphate-sugar epimerases
	PFDSM3638_01985.p01	CDS	NA	393003	393518	-	NA
	PFDSM3638_01990.p01	CDS	COG1721	393515	394771	-	[R] Uncharacterized conserved protein (some members contain
	PFDSM3638_01995.p01	CDS	COG0714	394768	395700	-	[R] MoxR-like ATPases
	PFDSM3638_02000.p01	CDS	ROG1332	395651	396715	-	NA
	PFDSM3638_02005.p01	CDS	ROG4244	396712	398475	-	NA
176
	PFDSM3638_02010.p01	CDS	ROG4678	398536	399306	+	NA
	PFDSM3638_02015.p01	CDS	ROG4475	399317	399559	+	NA
	PFDSM3638_02020.p01	CDS	COG1287	399556	401787	+	[R] Uncharacterized membrane protein, required for N-linked
177
	PFDSM3638_02025.p01	CDS	COG0668	401784	402788	-	[M] Small-conductance mechanosensitive channel
	PFDSM3638_02030.p01	CDS	COG2430	402792	403415	-	[S] Uncharacterized conserved protein
178
	PFDSM3638_02035.p01	CDS	NA	403469	403954	+	NA
179
	PFDSM3638_02040.p01	CDS	COG1520	403913	405100	-	[S] FOG: WD40-like repeat
	PFDSM3638_02045.p01	CDS	NA	405103	405918	-	NA
	PFDSM3638_02050.p01	CDS	COG1721	405915	407114	-	[R] Uncharacterized conserved protein (some members contain
	PFDSM3638_02055.p01	CDS	COG0714	407124	408077	-	[R] MoxR-like ATPases
	PFDSM3638_02060.p01	CDS	NA	408067	409053	-	NA
	PFDSM3638_02065.p01	CDS	COG1305	409035	411893	-	[E] Transglutaminase-like enzymes, putative cysteine proteases
	PFDSM3638_02070.p01	CDS	COG1759	411949	413091	-	[R] ATP-utilizing enzymes of ATP-grasp superfamily (probably
	PFDSM3638_02075.p01	CDS	COG0151	413103	414419	-	[F] Phosphoribosylamine-glycine ligase
180
	PFDSM3638_02085.p01	CDS	NA	415250	416014	+	NA
	PFDSM3638_02090.p01	CDS	COG0026	416076	417194	+	[F] Phosphoribosylaminoimidazole carboxylase (NCAIR synthetase)
	PFDSM3638_02095.p01	CDS	COG0041	417187	417699	+	[F] Phosphoribosylcarboxyaminoimidazole (NCAIR) mutase
181
	PFDSM3638_02100.p01	CDS	COG2872	417784	418233	+	[R] Predicted metal-dependent hydrolases related to alanyl-tRNA
182
	PFDSM3638_02105.p01	CDS	COG0591	418255	419736	-	[ER] Na+/proline symporter
183
	PFDSM3638_02115.p01	CDS	COG0027	420699	421988	-	[F] Formate-dependent phosphoribosylglycinamide formyltransferase (GAR transformylase)
184
	PFDSM3638_02120.p01	CDS	COG0150	422124	423128	+	[F] Phosphoribosylaminoimidazole (AIR) synthetase
	PFDSM3638_02125.p01	CDS	COG0647	423152	423973	+	[G] Predicted sugar phosphatases of the HAD
185
	PFDSM3638_02130.p01	CDS	ROG7925	424320	424475	+	NA
	PFDSM3638_02135.p01	CDS	NA	424491	424808	+	NA
186
	PFDSM3638_02140.p01	CDS	NA	425207	425554	-	NA
187
	PFDSM3638_02145.p01	CDS	COG1672	425555	426922	+	[R] Predicted ATPase (AAA+ superfamily)
188
	PFDSM3638_02155.p01	CDS	NA	427705	428679	-	NA
	PFDSM3638_02160.p01	CDS	COG3291	428681	429979	-	[R] FOG: PKD repeat
	PFDSM3638_02165.p01	CDS	NA	430022	430273	-	NA
189
	PFDSM3638_02170.p01	CDS	COG1373	430605	430931	+	[R] Predicted ATPase (AAA+ superfamily)
190
	PFDSM3638_02175.p01	CDS	ROG1182	431433	432569	-	NA
191
	PFDSM3638_02180.p01	CDS	NA	433586	433813	+	NA
192
	PFDSM3638_02185.p01	CDS	COG0209	434046	439268	-	[F] Ribonucleotide reductase, alpha subunit
193
	PFDSM3638_02190.p01	CDS	COG1085	439475	440458	-	[C] Galactose-1-phosphate uridylyltransferase
194
	PFDSM3638_02195.p01	CDS	COG2723	440515	441780	+	[G] Beta-glucosidase/6-phospho-beta-glucosidase/beta-galactosidase
195
	PFDSM3638_02200.p01	CDS	COG2223	441769	443100	-	[P] Nitrate/nitrite transporter
	PFDSM3638_02205.p01	CDS	COG1543	443087	444181	-	[S] Uncharacterized conserved protein
	PFDSM3638_02210.p01	CDS	COG0153	444178	445236	-	[G] Galactokinase
196
	PFDSM3638_02220.p01	CDS	COG3316	445849	446550	-	[L] Transposase and inactivated derivatives
	PFDSM3638_02225.p01	CDS	COG1208	446608	447069	-	[MJ] Nucleoside-diphosphate-sugar pyrophosphorylase involved in lipopolysaccharide biosynthesis/translation
197
	PFDSM3638_02230.p01	CDS	COG0679	447131	448009	+	[R] Predicted permeases
198
	PFDSM3638_02235.p01	CDS	COG0174	448006	449325	-	[E] Glutamine synthetase
199
	PFDSM3638_02240.p01	CDS	NA	449484	449762	-	NA
	PFDSM3638_02245.p01	CDS	COG2083	449765	450175	-	[S] Uncharacterized protein conserved in archaea
	PFDSM3638_02250.p01	CDS	COG2512	450185	451768	-	[S] Uncharacterized membrane-associated protein/domain
200
	PFDSM3638_02255.p01	CDS	COG0644	451874	452986	+	[C] Dehydrogenases (flavoproteins)
	PFDSM3638_02260.p01	CDS	COG4043	452997	453329	+	[S] Uncharacterized conserved protein
201
	PFDSM3638_02265.p01	CDS	COG2317	453326	454825	-	[E] Zn-dependent carboxypeptidase
202
	PFDSM3638_02270.p01	CDS	COG1994	454930	455496	-	[R] Zn-dependent proteases
	PFDSM3638_02275.p01	CDS	COG1056	455507	456073	-	[H] Nicotinamide mononucleotide adenylyltransferase
	PFDSM3638_02280.p01	CDS	COG1912	456079	456852	-	[S] Uncharacterized conserved protein
203
	PFDSM3638_02285.p01	CDS	COG1361	456925	458529	+	[M] S-layer domain
	PFDSM3638_02290.p01	CDS	COG1303	458545	459126	+	[S] Uncharacterized protein conserved in archaea
	PFDSM3638_02295.p01	CDS	ROG5552	459074	459637	+	NA
204
	PFDSM3638_02305.p01	CDS	COG1011	459684	460388	-	[R] Predicted hydrolase (HAD superfamily)
	PFDSM3638_02310.p01	CDS	COG2414	460429	462390	-	[C] Aldehyde:ferredoxin oxidoreductase
	PFDSM3638_02315.p01	CDS	COG1215	462440	463492	-	[M] Glycosyltransferases, probably involved in cell wall
	PFDSM3638_02320.p01	CDS	COG4871	463482	463772	-	[S] Uncharacterized protein conserved in archaea
	PFDSM3638_02325.p01	CDS	COG1067	463759	466845	-	[O] Predicted ATP-dependent protease
205
	PFDSM3638_02330.p01	CDS	COG1310	466901	467269	+	[R] Predicted metal-dependent protease of the PAD1/JAB1
206
	PFDSM3638_02335.p01	CDS	COG2411	467266	467838	-	[S] Uncharacterized conserved protein
	PFDSM3638_02340.p01	CDS	COG4043	467835	468176	-	[S] Uncharacterized conserved protein
207
	PFDSM3638_02345.p01	CDS	ROG5339	468250	469443	-	NA
	PFDSM3638_02350.p01	CDS	COG1991	469457	469621	-	[S] Uncharacterized conserved protein
208
	PFDSM3638_02355.p01	CDS	COG3642	469693	470355	+	[T] Mn2+-dependent serine/threonine protein kinase
209
	PFDSM3638_02360.p01	CDS	COG1193	470345	472033	-	[L] Mismatch repair ATPase (MutS family)
	PFDSM3638_02365.p01	CDS	COG1184	472030	472860	-	[J] Translation initiation factor 2B subunit, eIF-2B
	PFDSM3638_02370.p01	CDS	COG1058	472860	473618	-	[R] Predicted nucleotide-utilizing enzyme related to molybdopterin-biosynthesis
210
	PFDSM3638_02375.p01	CDS	COG0366	473769	475151	+	[G] Glycosidases
211
	PFDSM3638_02380.p01	CDS	COG0366	475077	477245	-	[G] Glycosidases
212
	PFDSM3638_02385.p01	CDS	ROG2822	477319	478716	-	NA
213
	PFDSM3638_02390.p01	CDS	COG2267	478876	479649	+	[I] Lysophospholipase
214
	PFDSM3638_02395.p01	CDS	COG1601	479800	480222	-	[J] Translation initiation factor 2, beta subunit
	PFDSM3638_02400.p01	CDS	COG1241	480265	483414	-	[L] Predicted ATPase involved in replication control,
	PFDSM3638_02405.p01	CDS	ROG2756	483416	483904	-	NA
	PFDSM3638_02410.p01	CDS	COG1763	483957	484703	-	[H] Molybdopterin-guanine dinucleotide biosynthesis protein
	PFDSM3638_02415.p01	CDS	COG0455	484751	485488	-	[D] ATPases involved in chromosome partitioning
215
	PFDSM3638_02420.p01	CDS	COG0697	485602	486456	+	[GER] Permeases of the drug/metabolite transporter (DMT)
216
	PFDSM3638_02425.p01	CDS	COG2247	486443	487444	-	[M] Putative cell wall-binding domain
217
	PFDSM3638_02430.p01	CDS	COG2125	487634	488011	+	[J] Ribosomal protein S6E (S10)
218
	PFDSM3638_02435.p01	CDS	NA	488108	488905	+	NA
219
	PFDSM3638_02440.p01	CDS	COG4044	488902	489633	-	[S] Uncharacterized protein conserved in archaea
	PFDSM3638_02445.p01	CDS	COG1675	489651	490238	-	[K] Transcription initiation factor IIE, alpha subunit
220
	PFDSM3638_02450.p01	CDS	NA	490355	490636	-	NA
221
	PFDSM3638_02455.r01	tRNA	NA	490741	490818	+	NA
	PFDSM3638_02460.p01	CDS	COG2433	490877	492856	+	[S] Uncharacterized conserved protein
	PFDSM3638_02465.p01	CDS	COG0550	492853	496035	+	[L] Topoisomerase IA
	PFDSM3638_02470.p01	CDS	COG1110	496119	499763	+	[L] Reverse gyrase
222
	PFDSM3638_02475.p01	CDS	COG1378	499976	500770	+	[K] Predicted transcriptional regulators
223
	PFDSM3638_02480.p01	CDS	ROG8437	500875	501087	-	NA
	PFDSM3638_02485.p01	CDS	COG1645	501084	501401	-	[R] Uncharacterized Zn-finger containing protein
	PFDSM3638_02490.p01	CDS	COG0010	501398	502111	-	[E] Arginase/agmatinase/formimionoglutamate hydrolase, arginase family
	PFDSM3638_02495.p01	CDS	COG2520	502116	502952	-	[R] Predicted methyltransferase
	PFDSM3638_02500.p01	CDS	COG1618	502921	503475	-	[F] Predicted nucleotide kinase
	PFDSM3638_02505.p01	CDS	COG1120	503506	504222	-	[PH] ABC-type cobalamin/Fe3+-siderophores transport systems, ATPase components
	PFDSM3638_02510.p01	CDS	COG0609	504215	505210	-	[P] ABC-type Fe3+-siderophore transport system, permease component
	PFDSM3638_02515.p01	CDS	COG1444	505240	507690	-	[R] Predicted P-loop ATPase fused to an
	PFDSM3638_02520.p01	CDS	COG2964	507730	508278	-	[S] Uncharacterized protein conserved in bacteria
224
	PFDSM3638_02525.p01	CDS	COG1991	508388	508570	+	[S] Uncharacterized conserved protein
225
	PFDSM3638_02530.p01	CDS	ROG3620	508657	508851	+	NA
226
	PFDSM3638_02535.p01	CDS	COG5305	508841	510868	-	[S] Predicted membrane protein
227
	PFDSM3638_02545.p01	CDS	COG1694	512973	513263	-	[R] Predicted pyrophosphatase
	PFDSM3638_02550.p01	CDS	COG0122	513260	514078	-	[L] 3-methyladenine DNA glycosylase/8-oxoguanine DNA glycosylase
228
	PFDSM3638_02555.p01	CDS	COG1813	514204	514728	+	[K] Predicted transcription factor, homolog of eukaryotic
229
	PFDSM3638_02560.p01	CDS	COG0160	514729	516108	-	[E] 4-aminobutyrate aminotransferase and related aminotransferases
	PFDSM3638_02565.p01	CDS	COG1115	516167	517720	-	[E] Na+/alanine symporter
230
	PFDSM3638_02570.p01	CDS	COG0531	517857	518660	+	[E] Amino acid transporters
	PFDSM3638_02575.p01	CDS	NA	518650	519069	+	NA
	PFDSM3638_02580.p01	CDS	COG0714	519056	520000	+	[R] MoxR-like ATPases
	PFDSM3638_02585.p01	CDS	COG1721	520011	521234	+	[R] Uncharacterized conserved protein (some members contain
	PFDSM3638_02590.p01	CDS	NA	521228	521641	+	NA
231
	PFDSM3638_02595.p01	CDS	ROG5344	521634	522824	-	NA
	PFDSM3638_02600.p01	CDS	COG2119	522835	523095	-	[S] Predicted membrane protein
	PFDSM3638_02605.p01	CDS	COG0436	523106	524278	-	[E] Aspartate/tyrosine/aromatic aminotransferase
232
	PFDSM3638_02610.p01	CDS	COG1617	524440	524868	-	[S] Uncharacterized conserved protein
233
	PFDSM3638_02615.p01	CDS	COG3609	525072	525260	+	[K] Predicted transcriptional regulators containing the CopG/Arc/MetJ
	PFDSM3638_02620.p01	CDS	COG0206	525279	526505	+	[D] Cell division GTPase
	PFDSM3638_02625.p01	CDS	COG1192	526552	527328	+	[D] ATPases involved in chromosome partitioning
	PFDSM3638_02630.p01	CDS	NA	527309	527650	+	NA
234
	PFDSM3638_02635.p01	CDS	COG1122	527630	528439	-	[P] ABC-type cobalt transport system, ATPase component
	PFDSM3638_02640.p01	CDS	COG0619	528436	529089	-	[P] ABC-type cobalt transport system, permease component
	PFDSM3638_02645.p01	CDS	ROG5339	529092	529343	-	NA
	PFDSM3638_02650.p01	CDS	COG0310	529340	529954	-	[P] ABC-type Co2+ transport system, permease component
235
	PFDSM3638_02655.p01	CDS	COG1042	530130	531503	+	[C] Acyl-CoA synthetase (NDP forming)
	PFDSM3638_02660.p01	CDS	COG4231	531496	533436	+	[C] Indolepyruvate ferredoxin oxidoreductase, alpha and beta
	PFDSM3638_02665.p01	CDS	COG1014	533439	534047	+	[C] Pyruvate:ferredoxin oxidoreductase and related 2-oxoacid:ferredoxin oxidoreductases,
236
	PFDSM3638_02670.p01	CDS	COG1356	534137	534565	-	[S] Uncharacterized protein conserved in archaea
237
	PFDSM3638_02680.p01	CDS	COG3316	534837	535538	-	[L] Transposase and inactivated derivatives
238
	PFDSM3638_02685.p01	CDS	COG1431	535964	538276	-	[J] Uncharacterized protein containing piwi/argonaute domain
239
	PFDSM3638_02690.r01	tRNA	NA	538447	538524	-	NA
240
	PFDSM3638_02695.p01	CDS	NA	539156	540592	-	NA
241
	PFDSM3638_02700.p01	CDS	ROG7944	540699	541125	+	NA
	PFDSM3638_02700.p01_2	CDS	NA	541125	541570	+	NA
242
	PFDSM3638_02705.p01	CDS	COG1351	541715	542449	+	[F] Predicted alternative thymidylate synthase
243
	PFDSM3638_02710.p01	CDS	COG0024	542650	543537	+	[J] Methionine aminopeptidase
	PFDSM3638_02715.r01	tRNA	NA	543579	543665	+	NA
	PFDSM3638_02720.p01	CDS	COG0303	543694	544899	+	[H] Molybdopterin biosynthesis enzyme
	PFDSM3638_02725.p01	CDS	COG1977	544911	545183	+	[H] Molybdopterin converting factor, small subunit
244
	PFDSM3638_02730.p01	CDS	COG0432	545180	545581	-	[S] Uncharacterized conserved protein
	PFDSM3638_02735.p01	CDS	NA	545574	545867	-	NA
	PFDSM3638_02740.p01	CDS	NA	545827	547119	-	NA
245
	PFDSM3638_02745.p01	CDS	COG2403	547339	548685	-	[R] Predicted GTPase
246
	PFDSM3638_02750.p01	CDS	COG0298	548926	549153	+	[O] Hydrogenase maturation factor
	PFDSM3638_02755.p01	CDS	COG0409	549154	550257	+	[O] Hydrogenase maturation factor
	PFDSM3638_02760.p01	CDS	COG0778	550306	551004	+	[C] Nitroreductase
	PFDSM3638_02765.p01	CDS	NA	551008	551187	+	NA
247
	PFDSM3638_02770.p01	CDS	COG0798	551189	552292	-	[P] Arsenite efflux pump ACR3 and related
248
	PFDSM3638_02775.p01	CDS	COG0394	552433	552882	+	[T] Protein-tyrosine-phosphatase
249
	PFDSM3638_02780.p01	CDS	COG0673	553169	554158	+	[R] Predicted dehydrogenases and related proteins
250
	PFDSM3638_02785.p01	CDS	NA	554217	555167	-	NA
	PFDSM3638_02790.p01	CDS	NA	555186	555755	-	NA
251
	PFDSM3638_02795.p01	CDS	COG1028	555949	556731	-	[IQR] Dehydrogenases with different specificities (related to
252
	PFDSM3638_02800.p01	CDS	COG1230	556918	557805	+	[P] Co/Zn/Cd efflux system component
253
	PFDSM3638_02805.p01	CDS	COG0068	557896	560217	+	[O] Hydrogenase maturation factor
254
	PFDSM3638_02810.p01	CDS	NA	560248	561150	-	NA
255
	PFDSM3638_02815.p01	CDS	ROG0256	561253	561756	+	NA
	PFDSM3638_02820.p01	CDS	COG3316	561813	562514	+	[L] Transposase and inactivated derivatives
	PFDSM3638_02825.p01	CDS	ROG1817	562522	563487	+	NA
256
	PFDSM3638_02835.p01	CDS	COG0553	563546	566368	-	[KL] Superfamily II DNA/RNA helicases, SNF2 family
	PFDSM3638_02840.p01	CDS	NA	566365	566793	-	NA
	PFDSM3638_02845.p01	CDS	COG1483	566793	570110	-	[R] Predicted ATPase (AAA+ superfamily)
257
	PFDSM3638_02855.p01	CDS	COG2028	573158	573583	+	[S] Uncharacterized conserved protein
258
	PFDSM3638_02865.p01	CDS	COG1112	574837	576804	+	[L] Superfamily I DNA and RNA helicases
259
	PFDSM3638_02870.p01	CDS	COG2002	576881	577108	+	[K] Regulators of stationary/sporulation gene expression
	PFDSM3638_02875.p01	CDS	COG1848	577096	577497	+	[R] Predicted nucleic acid-binding protein, contains PIN
260
	PFDSM3638_02885.p01	CDS	COG1848	577956	578294	-	[R] Predicted nucleic acid-binding protein, contains PIN
261
	PFDSM3638_02895.p01	CDS	COG1131	578584	579435	+	[V] ABC-type multidrug transport system, ATPase component
	PFDSM3638_02900.p01	CDS	ROG3613	579432	580133	+	NA
	PFDSM3638_02905.p01	CDS	ROG2436	580130	580822	+	NA
262
	PFDSM3638_02910.p01	CDS	NA	581083	582084	+	NA
263
	PFDSM3638_02915.p01	CDS	NA	582317	583639	-	NA
264
	PFDSM3638_02920.p01	CDS	COG0842	583747	584511	-	[V] ABC-type multidrug transport system, permease component
	PFDSM3638_02925.p01	CDS	COG1131	584508	585473	-	[V] ABC-type multidrug transport system, ATPase component
	PFDSM3638_02930.p01	CDS	COG1695	585442	585927	-	[K] Predicted transcriptional regulators
265
	PFDSM3638_02935.p01	CDS	COG1373	585992	587299	-	[R] Predicted ATPase (AAA+ superfamily)
266
	PFDSM3638_02940.p01	CDS	NA	587703	588302	+	NA
	PFDSM3638_02945.p01	CDS	NA	588295	588909	+	NA
267
	PFDSM3638_02950.p01	CDS	COG1109	589090	590457	-	[G] Phosphomannomutase
	PFDSM3638_02955.p01	CDS	COG0836	590498	591883	-	[M] Mannose-1-phosphate guanylyltransferase
	PFDSM3638_02960.p01	CDS	COG3769	591897	592625	-	[R] Predicted hydrolase (HAD superfamily)
	PFDSM3638_02965.p01	CDS	ROG5208	592622	593806	-	NA
	PFDSM3638_02970.p01	CDS	COG1205	593848	596451	-	[R] Distinct helicase family with a unique
	PFDSM3638_02975.p01	CDS	COG2248	596448	597380	-	[R] Predicted hydrolase (metallo-beta-lactamase superfamily)
	PFDSM3638_02980.p01	CDS	COG0078	597439	598386	-	[E] Ornithine carbamoyltransferase
268
	PFDSM3638_02985.p01	CDS	COG1798	598487	599296	-	[J] Diphthamide biosynthesis methyltransferase
	PFDSM3638_02990.p01	CDS	COG1236	599296	600123	-	[J] Predicted exonuclease of the beta-lactamase fold
269
	PFDSM3638_02995.p01	CDS	COG1473	600172	601320	+	[R] Metal-dependent amidase/aminoacylase/carboxypeptidase
270
	PFDSM3638_03000.p01	CDS	COG1781	601310	601768	-	[F] Aspartate carbamoyltransferase, regulatory subunit
	PFDSM3638_03005.p01	CDS	COG0540	601769	602695	-	[F] Aspartate carbamoyltransferase, catalytic chain
271
	PFDSM3638_03010.p01	CDS	NA	602787	603845	+	NA
	PFDSM3638_03015.p01	CDS	COG1992	603842	604729	+	[S] Uncharacterized conserved protein
	PFDSM3638_03020.p01	CDS	COG1853	604765	605283	+	[R] Conserved protein/domain typically associated with flavoprotein
272
	PFDSM3638_03025.p01	CDS	COG1656	607978	608445	+	[S] Uncharacterized conserved protein
273
	PFDSM3638_03030.p01	CDS	COG0309	608432	609442	-	[O] Hydrogenase maturation factor
274
	PFDSM3638_03035.p01	CDS	NA	609517	609962	-	NA
	PFDSM3638_03035.p01_2	CDS	ROG7944	609962	610388	-	NA
275
	PFDSM3638_03040.p01	CDS	COG2211	610433	611635	+	[G] Na+/melibiose symporter and related transporters
	PFDSM3638_03045.p01	CDS	COG5048	611661	612326	+	[R] FOG: Zn-finger
	PFDSM3638_03050.p01	CDS	COG1454	612336	613463	+	[C] Alcohol dehydrogenase, class IV
	PFDSM3638_03055.p01	CDS	ROG6215	613453	613830	+	NA
276
	PFDSM3638_03060.p01	CDS	COG3357	613811	614104	-	[K] Predicted transcriptional regulator containing an HTH
277
	PFDSM3638_03065.p01	CDS	COG1415	614157	615302	+	[S] Uncharacterized conserved protein
278
	PFDSM3638_03070.p01	CDS	COG3885	615292	616083	-	[S] Uncharacterized conserved protein
279
	PFDSM3638_03075.p01	CDS	COG1980	616327	617454	+	[G] Archaeal fructose 1,6-bisphosphatase
	PFDSM3638_03080.p01	CDS	COG3860	617509	617907	+	[S] Uncharacterized protein conserved in bacteria
	PFDSM3638_03085.p01	CDS	COG0375	617958	618377	+	[R] Zn finger protein HypA/HybF (possibly regulating
	PFDSM3638_03090.p01	CDS	COG0489	618374	619099	+	[D] ATPases involved in chromosome partitioning
	PFDSM3638_03095.p01	CDS	COG0680	619112	619588	+	[C] Ni,Fe-hydrogenase maturation factor
280
	PFDSM3638_03100.p01	CDS	COG0746	619553	620143	-	[H] Molybdopterin-guanine dinucleotide biosynthesis protein A
	PFDSM3638_03105.p01	CDS	COG1661	620137	620541	-	[R] Predicted DNA-binding protein with PD1-like DNA-binding
281
	PFDSM3638_03110.p01	CDS	COG1342	620598	620924	+	[R] Predicted DNA-binding proteins
	PFDSM3638_03115.p01	CDS	COG2512	620921	621772	+	[S] Uncharacterized membrane-associated protein/domain
282
	PFDSM3638_03120.p01	CDS	NA	621773	622273	-	NA
283
	PFDSM3638_03125.p01	CDS	ROG2372	622672	623133	-	NA
284
	PFDSM3638_03135.p01	CDS	COG2411	624703	624999	+	[S] Uncharacterized conserved protein
	PFDSM3638_03140.p01	CDS	ROG3187	625005	625673	+	NA
285
	PFDSM3638_03145.p01	CDS	ROG5946	625670	625849	-	NA
	PFDSM3638_03150.p01	CDS	COG1180	625883	626896	-	[O] Pyruvate-formate lyase-activating enzyme
	PFDSM3638_03155.p01	CDS	COG1672	626940	627701	-	[R] Predicted ATPase (AAA+ superfamily)
	PFDSM3638_03160.p01	CDS	ROG2255	627725	628180	-	NA
	PFDSM3638_03165.p01	CDS	COG1672	628173	629549	-	[R] Predicted ATPase (AAA+ superfamily)
	PFDSM3638_03170.p01	CDS	COG1672	629609	630958	-	[R] Predicted ATPase (AAA+ superfamily)
	PFDSM3638_03175.p01	CDS	COG1672	631051	632421	-	[R] Predicted ATPase (AAA+ superfamily)
286
	PFDSM3638_03180.p01	CDS	NA	632486	633532	-	NA
	PFDSM3638_03185.p01	CDS	NA	633529	634677	-	NA
	PFDSM3638_03190.p01	CDS	COG2254	634690	635403	-	[L] Predicted HD superfamily hydrolase, possibly a
	PFDSM3638_03195.p01	CDS	COG1203	635400	637376	-	[R] Predicted helicases
	PFDSM3638_03200.p01	CDS	COG1688	637346	638137	-	[L] Uncharacterized protein predicted to be involved
	PFDSM3638_03205.p01	CDS	COG1857	638138	639163	-	[L] Uncharacterized protein predicted to be involved
	PFDSM3638_03210.p01	CDS	NA	639160	639522	-	NA
287
	PFDSM3638_03215.p01	CDS	COG1672	639650	640312	+	[R] Predicted ATPase (AAA+ superfamily)
288
	PFDSM3638_03220.p01	CDS	COG1708	640434	640733	+	[R] Predicted nucleotidyltransferases
289
	PFDSM3638_03225.p01	CDS	COG2105	641066	641416	-	[S] Uncharacterized conserved protein
290
	PFDSM3638_03230.p01	CDS	COG0535	642082	643728	-	[R] Predicted Fe-S oxidoreductases
291
	PFDSM3638_03235.p01	CDS	ROG5612	643867	644217	+	NA
	PFDSM3638_03240.p01	CDS	COG1510	644252	644719	+	[K] Predicted transcriptional regulators
292
	PFDSM3638_03245.p01	CDS	NA	644825	645811	-	NA
	PFDSM3638_03250.p01	CDS	NA	645796	646563	-	NA
293
	PFDSM3638_03255.p01	CDS	COG1373	646971	648158	+	[R] Predicted ATPase (AAA+ superfamily)
294
	PFDSM3638_03260.p01	CDS	NA	648311	648835	+	NA
295
	PFDSM3638_03265.p01	CDS	ROG1182	649037	649414	+	NA
296
	PFDSM3638_03275.p01	CDS	NA	650845	651243	-	NA
	PFDSM3638_03280.p01	CDS	COG0329	651283	652179	-	[EM] Dihydrodipicolinate synthase/N-acetylneuraminate lyase
	PFDSM3638_03285.p01	CDS	ROG7039	652192	652509	-	NA
297
	PFDSM3638_03290.p01	CDS	NA	652746	652970	-	NA
298
	PFDSM3638_03295.p01	CDS	NA	652969	653163	+	NA
299
	PFDSM3638_03300.p01	CDS	COG1600	653309	654265	-	[C] Uncharacterized Fe-S protein
300
	PFDSM3638_03305.p01	CDS	COG1378	654348	655130	+	[K] Predicted transcriptional regulators
301
	PFDSM3638_03310.p01	CDS	ROG2031	655223	655414	+	NA
302
	PFDSM3638_03315.p01	CDS	NA	655479	656441	+	NA
	PFDSM3638_03320.p01	CDS	ROG2464	656472	656780	+	NA
303
	PFDSM3638_03325.p01	CDS	COG2064	656800	657150	-	[NU] Flp pilus assembly protein TadC
304
	PFDSM3638_03330.p01	CDS	COG0144	657265	658623	-	[J] tRNA and rRNA cytosine-C5-methylases
305
	PFDSM3638_03335.p01	CDS	COG0015	658870	660222	-	[F] Adenylosuccinate lyase
306
	PFDSM3638_03340.p01	CDS	COG0251	660390	660770	-	[J] Putative translation initiation inhibitor, yjgF family
307
	PFDSM3638_03345.p01	CDS	COG0454	660861	661793	+	[KR] Histone acetyltransferase HPA2 and related acetyltransferases
308
	PFDSM3638_03350.p01	CDS	COG1245	662002	663774	-	[R] Predicted ATPase, RNase L inhibitor (RLI)
309
	PFDSM3638_03355.p01	CDS	ROG7317	663846	664049	+	NA
	PFDSM3638_03360.p01	CDS	COG4799	664107	665675	+	[I] Acetyl-CoA carboxylase, carboxyltransferase component (subunits alpha
	PFDSM3638_03365.p01	CDS	COG3630	665686	666042	+	[C] Na+-transporting methylmalonyl-CoA/oxaloacetate decarboxylase, gamma subunit
	PFDSM3638_03370.p01	CDS	COG0511	666045	666479	+	[I] Biotin carboxyl carrier protein
	PFDSM3638_03375.p01	CDS	COG1883	666486	667688	+	[C] Na+-transporting methylmalonyl-CoA/oxaloacetate decarboxylase, beta subunit
	PFDSM3638_03380.p01	CDS	ROG4088	667745	667996	+	NA
310
	PFDSM3638_03385.p01	CDS	COG0549	667993	668937	-	[E] Carbamate kinase
311
	PFDSM3638_03390.p01	CDS	COG1204	669069	671231	-	[R] Superfamily II helicase
	PFDSM3638_03395.p01	CDS	COG2419	671241	672389	-	[S] Uncharacterized conserved protein
312
	PFDSM3638_03400.p01	CDS	COG1451	672404	673075	+	[R] Predicted metal-dependent hydrolase
313
	PFDSM3638_03405.p01	CDS	COG0432	673050	673463	-	[S] Uncharacterized conserved protein
314
	PFDSM3638_03410.p01	CDS	NA	673670	674347	+	NA
315
	PFDSM3638_03415.p01	CDS	NA	674569	674985	+	NA
316
	PFDSM3638_03420.p01	CDS	COG2810	675403	676323	-	[V] Predicted type IV restriction endonuclease
	PFDSM3638_03425.p01	CDS	NA	676335	676754	-	NA
	PFDSM3638_03430.p01	CDS	COG1405	676761	677612	-	[K] Transcription initiation factor TFIIIB, Brf1 subunit/Transcription
317
	PFDSM3638_03435.p01	CDS	COG1404	681365	681865	+	[O] Subtilisin-like serine proteases
	PFDSM3638_03440.p01	CDS	COG1151	681936	682307	+	[C] 6Fe-6S prismane cluster-containing protein
318
	PFDSM3638_03445.p01	CDS	COG2522	682437	682823	-	[R] Predicted transcriptional regulator
319
	PFDSM3638_03450.p01	CDS	COG1151	682997	684367	+	[C] 6Fe-6S prismane cluster-containing protein
320
	PFDSM3638_03455.p01	CDS	ROG1491	684392	684868	-	NA
321
	PFDSM3638_03460.p01	CDS	COG0426	684979	686154	+	[C] Uncharacterized flavoproteins
	PFDSM3638_03465.p01	CDS	COG2461	686156	687496	+	[S] Uncharacterized conserved protein
	PFDSM3638_03470.p01	CDS	COG0662	687498	687809	+	[G] Mannose-6-phosphate isomerase
322
	PFDSM3638_03475.p01	CDS	ROG2472	687888	688208	+	NA
	PFDSM3638_03480.p01	CDS	ROG3705	688223	688819	+	NA
323
	PFDSM3638_03485.p01	CDS	NA	689505	690026	+	NA
324
	PFDSM3638_03490.p01	CDS	ROG2572	690041	690856	-	NA
325
	PFDSM3638_03495.p01	CDS	COG3439	690928	691281	-	[S] Uncharacterized conserved protein
	PFDSM3638_03500.p01	CDS	COG0785	691295	692596	-	[O] Cytochrome c biogenesis protein
	PFDSM3638_03505.p01	CDS	COG3370	692658	692987	-	[S] Uncharacterized protein conserved in archaea
	PFDSM3638_03510.p01	CDS	ROG5194	692990	693196	-	NA
326
	PFDSM3638_03520.p01	CDS	COG0534	693561	694946	-	[V] Na+-driven multidrug efflux pump
	PFDSM3638_03525.p01	CDS	COG2512	694986	695303	-	[S] Uncharacterized membrane-associated protein/domain
327
	PFDSM3638_03535.p01	CDS	COG0716	696577	697101	+	[C] Flavodoxins
328
	PFDSM3638_03540.p01	CDS	COG0778	697364	697900	-	[C] Nitroreductase
329
	PFDSM3638_03545.p01	CDS	COG2084	697962	698798	+	[I] 3-hydroxyisobutyrate dehydrogenase and related beta-hydroxyacid dehydrogenases
330
	PFDSM3638_03550.p01	CDS	COG0500	699186	699710	+	[QR] SAM-dependent methyltransferases
331
	PFDSM3638_03560.p01	CDS	NA	700286	701029	+	NA
	PFDSM3638_03565.p01	CDS	ROG0063	701065	701289	+	NA
332
	PFDSM3638_03580.p01	CDS	COG0431	701991	702557	-	[R] Predicted flavoprotein
333
	PFDSM3638_03585.p01	CDS	COG0450	702699	703268	+	[O] Peroxiredoxin
334
	PFDSM3638_03590.p01	CDS	COG0672	703603	704439	+	[P] High-affinity Fe2+/Pb2+ permease
335
	PFDSM3638_03595.p01	CDS	ROG4594	704538	705122	+	NA
	PFDSM3638_03600.p01	CDS	COG1832	705158	705550	+	[R] Predicted CoA-binding protein
	PFDSM3638_03605.p01	CDS	ROG2376	705554	705928	+	NA
336
	PFDSM3638_03610.p01	CDS	COG2608	706022	706240	+	[P] Copper chaperone
337
	PFDSM3638_03615.p01	CDS	COG0500	706357	706998	+	[QR] SAM-dependent methyltransferases
	PFDSM3638_03620.p01	CDS	COG1456	707002	708168	+	[C] CO dehydrogenase/acetyl-CoA synthase gamma subunit (corrinoid
	PFDSM3638_03625.p01	CDS	NA	708226	709140	+	NA
338
	PFDSM3638_03635.p01	CDS	COG4555	709490	710239	-	[CP] ABC-type Na+ transport system, ATPase component
	PFDSM3638_03640.p01	CDS	NA	710265	710837	-	NA
339
	PFDSM3638_03645.p01	CDS	COG4555	710978	711886	-	[CP] ABC-type Na+ transport system, ATPase component
	PFDSM3638_03650.p01	CDS	NA	711883	712998	-	NA
	PFDSM3638_03655.p01	CDS	ROG2048	713002	713718	-	NA
340
	PFDSM3638_03660.p01	CDS	NA	714090	714650	-	NA
	PFDSM3638_03665.p01	CDS	COG3633	714661	714846	-	[E] Na+/serine symporter
341
	PFDSM3638_03670.p01	CDS	ROG1601	715493	715627	+	NA
342
	PFDSM3638_03675.p01	CDS	COG0500	715646	716251	-	[QR] SAM-dependent methyltransferases
343
	PFDSM3638_03680.p01	CDS	COG5584	716407	716766	+	[S] Predicted small secreted protein
344
	PFDSM3638_03690.p01	CDS	COG1522	717564	718184	-	[K] Transcriptional regulators
345
	PFDSM3638_03695.p01	CDS	COG2217	718309	720708	+	[P] Cation transport ATPase
	PFDSM3638_03700.p01	CDS	ROG1104	720724	721026	+	NA
346
	PFDSM3638_03705.p01	CDS	COG1528	721127	721651	+	[P] Ferritin-like protein
347
	PFDSM3638_03710.p01	CDS	COG1832	721928	722170	+	[R] Predicted CoA-binding protein
348
	PFDSM3638_03715.p01	CDS	COG2274	722400	723989	-	[V] ABC-type bacteriocin/lantibiotic exporters, contain an N-terminal
349
	PFDSM3638_03720.p01	CDS	COG2095	724677	725312	-	[U] Multiple antibiotic transporter
350
	PFDSM3638_03725.p01	CDS	COG0428	725375	726184	+	[P] Predicted divalent heavy-metal cations transporter
351
	PFDSM3638_03730.p01	CDS	COG0006	726176	727252	-	[E] Xaa-Pro aminopeptidase
352
	PFDSM3638_03735.p01	CDS	COG0778	728023	728610	+	[C] Nitroreductase
353
	PFDSM3638_03740.p01	CDS	COG0426	728580	729824	-	[C] Uncharacterized flavoproteins
	PFDSM3638_03745.p01	CDS	COG1225	729873	730322	-	[O] Peroxiredoxin
	PFDSM3638_03750.p01	CDS	COG1013	730327	731193	-	[C] Pyruvate:ferredoxin oxidoreductase and related 2-oxoacid:ferredoxin oxidoreductases,
	PFDSM3638_03755.p01	CDS	COG0674	731190	732902	-	[C] Pyruvate:ferredoxin oxidoreductase and related 2-oxoacid:ferredoxin oxidoreductases,
	PFDSM3638_03760.p01	CDS	COG1012	732953	734473	-	[C] NAD-dependent aldehyde dehydrogenases
354
	PFDSM3638_03765.p01	CDS	COG3316	734627	735328	+	[L] Transposase and inactivated derivatives
355
	PFDSM3638_03775.p01	CDS	COG0675	735917	736234	+	[L] Transposase and inactivated derivatives
	PFDSM3638_03780.p01	CDS	COG0675	736195	737217	+	[L] Transposase and inactivated derivatives
356
	PFDSM3638_03800.p01	CDS	COG0677	739671	741017	-	[M] UDP-N-acetyl-D-mannosaminuronate dehydrogenase
	PFDSM3638_03805.p01	CDS	COG0673	741018	741968	-	[R] Predicted dehydrogenases and related proteins
	PFDSM3638_03810.p01	CDS	COG0399	741974	743068	-	[M] Predicted pyridoxal phosphate-dependent enzyme apparently involved
357
	PFDSM3638_03820.p01	CDS	COG0463	743764	744660	-	[M] Glycosyltransferases involved in cell wall biogenesis
	PFDSM3638_03825.p01	CDS	COG1210	744653	745531	-	[M] UDP-glucose pyrophosphorylase
	PFDSM3638_03830.p01	CDS	COG1004	745528	746799	-	[M] Predicted UDP-glucose 6-dehydrogenase
358
	PFDSM3638_03835.p01	CDS	COG1708	746823	747221	+	[R] Predicted nucleotidyltransferases
359
	PFDSM3638_03840.p01	CDS	COG1753	747474	747710	-	[S] Uncharacterized conserved protein
360
	PFDSM3638_03845.p01	CDS	ROG1176	747915	748145	+	NA
361
	PFDSM3638_03850.p01	CDS	COG4113	748218	748544	+	[R] Predicted nucleic acid-binding protein, contains PIN
362
	PFDSM3638_03860.p01	CDS	NA	749241	749459	-	NA
	PFDSM3638_03865.p01	CDS	COG1848	749466	749645	-	[R] Predicted nucleic acid-binding protein, contains PIN
	PFDSM3638_03870.p01	CDS	COG2880	749642	749776	-	[S] Uncharacterized protein conserved in archaea
363
	PFDSM3638_03875.p01	CDS	COG3316	749853	750554	+	[L] Transposase and inactivated derivatives
364
	PFDSM3638_03885.p01	CDS	COG1848	750731	751147	+	[R] Predicted nucleic acid-binding protein, contains PIN
365
	PFDSM3638_03890.p01	CDS	COG2244	751480	751809	+	[R] Membrane protein involved in the export
	PFDSM3638_03895.p01	CDS	COG2244	751836	753053	+	[R] Membrane protein involved in the export
366
	PFDSM3638_03900.p01	CDS	COG0438	753021	753611	-	[M] Glycosyltransferase
367
	PFDSM3638_03905.p01	CDS	COG3316	753677	754378	+	[L] Transposase and inactivated derivatives
368
	PFDSM3638_03910.p01	CDS	COG0438	754370	754948	-	[M] Glycosyltransferase
369
	PFDSM3638_03915.p01	CDS	ROG7944	755073	755498	+	NA
	PFDSM3638_03915.p01_2	CDS	ROG7944	755501	755944	+	NA
370
	PFDSM3638_03920.p01	CDS	COG0438	755925	756314	-	[M] Glycosyltransferase
	PFDSM3638_03925.p01	CDS	COG0438	756311	756970	-	[M] Glycosyltransferase
	PFDSM3638_03930.p01	CDS	COG0438	756975	757445	-	[M] Glycosyltransferase
	PFDSM3638_03935.p01	CDS	ROG5195	757458	759218	-	NA
	PFDSM3638_03940.p01	CDS	COG0438	759164	760333	-	[M] Glycosyltransferase
	PFDSM3638_03945.p01	CDS	COG0367	760334	761944	-	[E] Asparagine synthase (glutamine-hydrolyzing)
	PFDSM3638_03950.p01	CDS	NA	761946	762209	-	NA
	PFDSM3638_03955.p01	CDS	COG0381	762271	763347	-	[M] UDP-N-acetylglucosamine 2-epimerase
	PFDSM3638_03960.p01	CDS	COG0438	763344	764546	-	[M] Glycosyltransferase
	PFDSM3638_03965.p01	CDS	COG0110	764559	765059	-	[R] Acetyltransferase (isoleucine patch superfamily)
	PFDSM3638_03970.p01	CDS	ROG0089	765068	766111	-	NA
	PFDSM3638_03975.p01	CDS	COG0463	766124	767032	-	[M] Glycosyltransferases involved in cell wall biogenesis
	PFDSM3638_03980.p01	CDS	COG0677	767044	767244	-	[M] UDP-N-acetyl-D-mannosaminuronate dehydrogenase
371
	PFDSM3638_03990.p01	CDS	ROG6292	768312	768716	-	NA
	PFDSM3638_03995.p01	CDS	COG1721	768713	769957	-	[R] Uncharacterized conserved protein (some members contain
	PFDSM3638_04000.p01	CDS	COG0714	769954	770883	-	[R] MoxR-like ATPases
372
	PFDSM3638_04010.p01	CDS	ROG4244	771867	773555	-	NA
373
	PFDSM3638_04015.p01	CDS	ROG4678	773611	774369	+	NA
	PFDSM3638_04020.p01	CDS	ROG4475	774360	774602	+	NA
374
	PFDSM3638_04025.p01	CDS	COG4743	774720	775709	+	[S] Predicted membrane protein
375
	PFDSM3638_04030.p01	CDS	COG1287	775765	776205	-	[R] Uncharacterized membrane protein, required for N-linked
376
	PFDSM3638_04035.p01	CDS	COG1848	776391	776807	-	[R] Predicted nucleic acid-binding protein, contains PIN
	PFDSM3638_04040.p01	CDS	COG2002	776804	777034	-	[K] Regulators of stationary/sporulation gene expression
377
	PFDSM3638_04045.p01	CDS	NA	777259	777747	+	NA
378
	PFDSM3638_04055.p01	CDS	COG0668	778491	779303	-	[M] Small-conductance mechanosensitive channel
379
	PFDSM3638_04060.p01	CDS	COG3316	779422	780123	-	[L] Transposase and inactivated derivatives
380
	PFDSM3638_04065.r01	tRNA	NA	780251	780328	+	NA
	PFDSM3638_04070.r01	tRNA	NA	780332	780409	+	NA
381
	PFDSM3638_04075.p01	CDS	COG0123	780426	781433	-	[BQ] Deacetylases, including yeast histone deacetylase and
	PFDSM3638_04080.p01	CDS	COG2163	781486	781737	-	[J] Ribosomal protein L14E/L6E/L27E
	PFDSM3638_04085.p01	CDS	COG1102	781738	782316	-	[F] Cytidylate kinase
	PFDSM3638_04090.p01	CDS	COG2174	782328	782597	-	[J] Ribosomal protein L34E
382
	PFDSM3638_04095.p01	CDS	NA	782676	782921	+	NA
	PFDSM3638_04100.p01	CDS	COG0534	782979	784394	+	[V] Na+-driven multidrug efflux pump
	PFDSM3638_04105.p01	CDS	COG0534	784405	785844	+	[V] Na+-driven multidrug efflux pump
383
	PFDSM3638_04110.p01	CDS	COG1505	785828	787678	-	[E] Serine proteases of the peptidase family
	PFDSM3638_04115.p01	CDS	ROG2472	787711	788817	-	NA
	PFDSM3638_04120.p01	CDS	COG2265	788841	790070	-	[J] SAM-dependent methyltransferases related to tRNA (uracil-5-)-methyltransferase
	PFDSM3638_04125.p01	CDS	COG2102	790067	790756	-	[R] Predicted ATPases of PP-loop superfamily
	PFDSM3638_04130.p01	CDS	COG4049	790805	790999	-	[R] Uncharacterized protein containing archaeal-type C2H2 Zn-finger
	PFDSM3638_04135.p01	CDS	COG1585	791035	791421	-	[OU] Membrane protein implicated in regulation of
	PFDSM3638_04140.p01	CDS	COG3503	791418	792194	-	[S] Predicted membrane protein
384
	PFDSM3638_04145.p01	CDS	COG1267	792653	792910	+	[I] Phosphatidylglycerophosphatase A and related proteins
385
	PFDSM3638_04150.p01	CDS	NA	792969	793667	-	NA
	PFDSM3638_04155.p01	CDS	COG4555	793664	794545	-	[CP] ABC-type Na+ transport system, ATPase component
386
	PFDSM3638_04165.p01	CDS	COG5559	795640	795834	+	[S] Uncharacterized conserved small protein
	PFDSM3638_04170.p01	CDS	COG2402	795834	796214	+	[R] Predicted nucleic acid-binding protein, contains PIN
387
	PFDSM3638_04175.p01	CDS	COG2266	796316	796549	+	[H] GTP:adenosylcobinamide-phosphate guanylyltransferase
	PFDSM3638_04180.p01	CDS	COG2266	796555	796782	+	[H] GTP:adenosylcobinamide-phosphate guanylyltransferase
	PFDSM3638_04185.p01	CDS	ROG1306	796839	797105	+	NA
	PFDSM3638_04190.p01	CDS	ROG1306	797105	797434	+	NA
	PFDSM3638_04195.p01	CDS	ROG1306	797476	797790	+	NA
388
	PFDSM3638_04200.p01	CDS	COG1533	798006	798803	+	[L] DNA repair photolyase
	PFDSM3638_04205.p01	CDS	ROG7976	798804	799607	+	NA
389
	PFDSM3638_04210.p01	CDS	COG4231	799585	801423	-	[C] Indolepyruvate ferredoxin oxidoreductase, alpha and beta
390
	PFDSM3638_04215.p01	CDS	COG1574	801392	802903	+	[R] Predicted metal-dependent hydrolase with the TIM-barrel
391
	PFDSM3638_04220.p01	CDS	COG4123	802874	803620	-	[R] Predicted O-methyltransferase
	PFDSM3638_04225.p01	CDS	ROG7670	803671	804441	-	NA
392
	PFDSM3638_04230.p01	CDS	COG1625	804712	805788	+	[C] Fe-S oxidoreductase, related to NifB/MoaA family
393
	PFDSM3638_04235.p01	CDS	COG2108	805844	806926	+	[R] Uncharacterized conserved protein related to pyruvate
	PFDSM3638_04240.p01	CDS	COG1321	806969	807406	+	[K] Mn-dependent transcriptional regulator
394
	PFDSM3638_04245.p01	CDS	COG2252	807388	808716	-	[R] Permeases
	PFDSM3638_04250.p01	CDS	COG0005	808862	809659	-	[F] Purine nucleoside phosphorylase
395
	PFDSM3638_04255.r01	tRNA	NA	809722	809799	+	NA
396
	PFDSM3638_04260.p01	CDS	ROG3927	809946	810905	-	NA
	PFDSM3638_04265.p01	CDS	NA	810902	811792	-	NA
397
	PFDSM3638_04270.r01	tRNA	NA	812542	812618	+	NA
	PFDSM3638_04275.p01	CDS	COG2070	812643	813767	+	[R] Dioxygenases related to 2-nitropropane dioxygenase
398
	PFDSM3638_04280.p01	CDS	ROG3124	813757	813996	-	NA
	PFDSM3638_04285.p01	CDS	COG0370	813989	815980	-	[P] Fe2+ transport system protein B
	PFDSM3638_04290.p01	CDS	COG1918	815983	816192	-	[P] Fe2+ transport system protein A
399
	PFDSM3638_04295.p01	CDS	COG0084	816316	817074	-	[L] Mg-dependent DNase
400
	PFDSM3638_04300.p01	CDS	COG0434	817129	817917	+	[R] Predicted TIM-barrel enzyme
	PFDSM3638_04305.p01	CDS	COG1109	817920	819278	+	[G] Phosphomannomutase
401
	PFDSM3638_04310.p01	CDS	NA	819298	819495	-	NA
	PFDSM3638_04315.p01	CDS	NA	819527	819835	-	NA
402
	PFDSM3638_04320.p01	CDS	COG0180	819896	821023	+	[J] Tryptophanyl-tRNA synthetase
403
	PFDSM3638_04325.p01	CDS	COG1437	820995	821510	-	[F] Adenylate cyclase, class 2 (thermophilic)
	PFDSM3638_04330.p01	CDS	COG1522	821517	822005	-	[K] Transcriptional regulators
	PFDSM3638_04335.p01	CDS	COG0163	822009	822542	-	[H] 3-polyprenyl-4-hydroxybenzoate decarboxylase
404
	PFDSM3638_04340.p01	CDS	COG1624	822652	823461	+	[S] Uncharacterized conserved protein
405
	PFDSM3638_04345.p01	CDS	COG4003	823458	823769	-	[S] Uncharacterized protein conserved in archaea
406
	PFDSM3638_04350.p01	CDS	COG1208	823905	825146	+	[MJ] Nucleoside-diphosphate-sugar pyrophosphorylase involved in lipopolysaccharide biosynthesis/translation
	PFDSM3638_04355.p01	CDS	COG0017	825207	826523	+	[J] Aspartyl/asparaginyl-tRNA synthetases
407
	PFDSM3638_04360.p01	CDS	NA	826524	828317	-	NA
	PFDSM3638_04365.p01	CDS	NA	828317	828724	-	NA
	PFDSM3638_04370.p01	CDS	COG0467	828726	829436	-	[T] RecA-superfamily ATPases implicated in signal transduction
408
	PFDSM3638_04375.p01	CDS	COG2355	829504	830442	+	[E] Zn-dependent dipeptidase, microsomal dipeptidase homolog
	PFDSM3638_04380.p01	CDS	COG2521	830439	831302	+	[R] Predicted archaeal methyltransferase
409
	PFDSM3638_04385.p01	CDS	COG1632	831280	831864	-	[J] Ribosomal protein L15E
410
	PFDSM3638_04395.p01	CDS	COG1672	832862	834265	+	[R] Predicted ATPase (AAA+ superfamily)
411
	PFDSM3638_04400.p01	CDS	COG4555	834459	835166	-	[CP] ABC-type Na+ transport system, ATPase component
	PFDSM3638_04405.p01	CDS	NA	835153	835617	-	NA
	PFDSM3638_04410.p01	CDS	ROG3682	835614	836369	-	NA
	PFDSM3638_04415.p01	CDS	NA	836366	837409	-	NA
412
	PFDSM3638_04420.p01	CDS	NA	837503	837850	-	NA
413
	PFDSM3638_04430.p01	CDS	ROG5158	838882	839787	+	NA
	PFDSM3638_04435.p01	CDS	NA	839772	840695	+	NA
414
	PFDSM3638_04440.p01	CDS	ROG5047	840821	841684	+	NA
415
	PFDSM3638_04445.p01	CDS	COG5218	841698	842675	-	[BD] Chromosome condensation complex Condensin, subunit G
416
	PFDSM3638_04450.p01	CDS	COG0495	842911	845814	+	[J] Leucyl-tRNA synthetase
417
	PFDSM3638_04455.p01	CDS	COG1145	846046	847149	+	[C] Ferredoxin
	PFDSM3638_04460.p01	CDS	COG0543	847146	848024	+	[HC] 2-polyprenylphenol hydroxylase and related flavodoxin oxidoreductases
	PFDSM3638_04465.p01	CDS	COG1941	848035	848820	+	[C] Coenzyme F420-reducing hydrogenase, gamma subunit
	PFDSM3638_04470.p01	CDS	COG3259	848817	850103	+	[C] Coenzyme F420-reducing hydrogenase, alpha subunit
418
	PFDSM3638_04475.p01	CDS	COG4555	850100	850720	-	[CP] ABC-type Na+ transport system, ATPase component
	PFDSM3638_04480.p01	CDS	NA	850717	851145	-	NA
	PFDSM3638_04485.p01	CDS	NA	851138	852280	-	NA
	PFDSM3638_04490.p01	CDS	NA	852286	852549	-	NA
419
	PFDSM3638_04495.p01	CDS	COG3316	852939	853640	-	[L] Transposase and inactivated derivatives
420
	PFDSM3638_04500.p01	CDS	NA	853760	854047	+	NA
421
	PFDSM3638_04505.p01	CDS	ROG0341	854402	855382	+	NA
422
	PFDSM3638_04510.p01	CDS	NA	855819	856259	-	NA
423
	PFDSM3638_04515.p01	CDS	ROG8529	856486	857481	+	NA
424
	PFDSM3638_04520.r01	tRNA	NA	857662	857749	-	NA
425
	PFDSM3638_04525.p01	CDS	COG1907	857846	858814	+	[R] Predicted archaeal sugar kinases
	PFDSM3638_04530.p01	CDS	COG4047	858824	859552	+	[S] Uncharacterized protein conserved in archaea
426
	PFDSM3638_04535.p01	CDS	COG4555	859811	860572	+	[CP] ABC-type Na+ transport system, ATPase component
	PFDSM3638_04540.p01	CDS	COG3368	860572	862035	+	[R] Predicted permease
	PFDSM3638_04545.p01	CDS	COG5256	862047	862373	+	[J] Translation elongation factor EF-1alpha (GTPase)
	PFDSM3638_04550.p01	CDS	COG1831	862383	863222	+	[R] Predicted metal-dependent hydrolase (urease superfamily)
427
	PFDSM3638_04555.p01	CDS	COG1120	863219	863965	-	[PH] ABC-type cobalamin/Fe3+-siderophores transport systems, ATPase components
	PFDSM3638_04560.p01	CDS	COG0609	863962	864993	-	[P] ABC-type Fe3+-siderophore transport system, permease component
	PFDSM3638_04565.p01	CDS	COG0614	865025	866110	-	[P] ABC-type Fe3+-hydroxamate transport system, periplasmic component
428
	PFDSM3638_04575.p01	CDS	ROG4594	866916	867629	-	NA
	PFDSM3638_04580.p01	CDS	COG3270	867687	868076	-	[S] Uncharacterized conserved protein
	PFDSM3638_04585.p01	CDS	NA	868086	868589	-	NA
429
	PFDSM3638_04590.p01	CDS	COG0101	868638	869438	+	[J] Pseudouridylate synthase
	PFDSM3638_04595.p01	CDS	NA	869469	869675	+	NA
430
	PFDSM3638_04605.p01	CDS	COG4555	870301	871218	-	[CP] ABC-type Na+ transport system, ATPase component
	PFDSM3638_04610.p01	CDS	COG1668	871230	872036	-	[CP] ABC-type Na+ efflux pump, permease component
	PFDSM3638_04615.p01	CDS	NA	872023	872505	-	NA
	PFDSM3638_04620.p01	CDS	ROG8504	872502	872930	-	NA
	PFDSM3638_04625.p01	CDS	COG0535	872927	873778	-	[R] Predicted Fe-S oxidoreductases
	PFDSM3638_04630.p01	CDS	COG0535	873705	874085	-	[R] Predicted Fe-S oxidoreductases
	PFDSM3638_04635.p01	CDS	ROG6142	874091	874318	-	NA
431
	PFDSM3638_04640.p01	CDS	COG1412	874725	875147	-	[R] Uncharacterized proteins of PilT N-term./Vapc superfamily
432
	PFDSM3638_04650.p01	CDS	COG2723	875471	875629	+	[G] Beta-glucosidase/6-phospho-beta-glucosidase/beta-galactosidase
	PFDSM3638_04655.p01	CDS	COG1762	875683	876153	+	[GT] Phosphotransferase system mannitol/fructose-specific IIA domain (Ntr-type)
433
	PFDSM3638_04660.p01	CDS	COG1634	876253	876948	+	[R] Uncharacterized Rossmann fold enzyme
434
	PFDSM3638_04665.p01	CDS	COG0105	876938	877423	-	[F] Nucleoside diphosphate kinase
	PFDSM3638_04670.p01	CDS	NA	877410	877664	-	NA
	PFDSM3638_04675.p01	CDS	COG1199	877639	879582	-	[KL] Rad3-related DNA helicases
435
	PFDSM3638_04680.p01	CDS	NA	879922	880308	+	NA
436
	PFDSM3638_04685.p01	CDS	COG0028	880617	882311	+	[EH] Thiamine pyrophosphate-requiring enzymes [acetolactate synthase, pyruvate
	PFDSM3638_04690.p01	CDS	COG0059	882322	883311	+	[EH] Ketol-acid reductoisomerase
	PFDSM3638_04695.p01	CDS	COG0119	883346	884845	+	[E] Isopropylmalate/homocitrate/citramalate synthases
	PFDSM3638_04700.p01	CDS	COG0065	884850	886124	+	[E] 3-isopropylmalate dehydratase large subunit
	PFDSM3638_04705.p01	CDS	COG0066	886121	886615	+	[E] 3-isopropylmalate dehydratase small subunit
	PFDSM3638_04710.p01	CDS	COG0473	886612	887679	+	[CE] Isocitrate/isopropylmalate dehydrogenase
	PFDSM3638_04715.p01	CDS	COG0119	887660	889237	+	[E] Isopropylmalate/homocitrate/citramalate synthases
	PFDSM3638_04720.p01	CDS	COG0129	889234	890889	+	[EG] Dihydroxyacid dehydratase/phosphogluconate dehydratase
437
	PFDSM3638_04725.p01	CDS	COG2250	891051	891386	+	[S] Uncharacterized conserved protein related to C-terminal
	PFDSM3638_04730.p01	CDS	COG1708	891349	891717	+	[R] Predicted nucleotidyltransferases
438
	PFDSM3638_04735.p01	CDS	NA	891718	892107	-	NA
439
	PFDSM3638_04740.p01	CDS	COG3316	892230	892931	+	[L] Transposase and inactivated derivatives
440
	PFDSM3638_04745.p01	CDS	ROG5746	892891	893664	-	NA
441
	PFDSM3638_04750.p01	CDS	NA	894319	895050	+	NA
	PFDSM3638_04755.p01	CDS	NA	895063	895419	+	NA
442
	PFDSM3638_04760.p01	CDS	ROG1182	895828	896157	+	NA
	PFDSM3638_04765.p01	CDS	ROG1182	896228	897295	+	NA
443
	PFDSM3638_04770.p01	CDS	COG0454	897251	898120	-	[KR] Histone acetyltransferase HPA2 and related acetyltransferases
444
	PFDSM3638_04775.p01	CDS	NA	898225	898674	-	NA
	PFDSM3638_04780.p01	CDS	ROG7951	898690	899628	-	NA
445
	PFDSM3638_04785.p01	CDS	NA	899832	900695	-	NA
446
	PFDSM3638_04790.p01	CDS	ROG6320	900845	901030	-	NA
447
	PFDSM3638_04795.p01	CDS	COG1373	901195	901569	-	[R] Predicted ATPase (AAA+ superfamily)
448
	PFDSM3638_04800.p01	CDS	COG1487	902028	902255	-	[R] Predicted nucleic acid-binding protein, contains PIN
	PFDSM3638_04805.p01	CDS	NA	902294	902476	-	NA
	PFDSM3638_04810.p01	CDS	COG3682	902473	902658	-	[K] Predicted transcriptional regulator
	PFDSM3638_04815.p01	CDS	ROG7236	902694	903059	-	NA
449
	PFDSM3638_04820.r01	tRNA	NA	903162	903239	+	NA
	PFDSM3638_04825.r01	tRNA	NA	903252	903329	+	NA
450
	PFDSM3638_04830.p01	CDS	NA	903354	903572	-	NA
451
	PFDSM3638_04835.p01	CDS	ROG1579	903734	904252	-	NA
452
	PFDSM3638_04840.p01	CDS	COG0464	904328	906841	-	[O] ATPases of the AAA+ class
	PFDSM3638_04845.p01	CDS	ROG1859	906846	907601	-	NA
453
	PFDSM3638_04850.p01	CDS	COG1013	907666	908661	-	[C] Pyruvate:ferredoxin oxidoreductase and related 2-oxoacid:ferredoxin oxidoreductases,
	PFDSM3638_04855.p01	CDS	COG0674	908672	909862	-	[C] Pyruvate:ferredoxin oxidoreductase and related 2-oxoacid:ferredoxin oxidoreductases,
	PFDSM3638_04860.p01	CDS	COG1144	909873	910190	-	[C] Pyruvate:ferredoxin oxidoreductase and related 2-oxoacid:ferredoxin oxidoreductases,
	PFDSM3638_04865.p01	CDS	COG1013	910239	911174	-	[C] Pyruvate:ferredoxin oxidoreductase and related 2-oxoacid:ferredoxin oxidoreductases,
	PFDSM3638_04870.p01	CDS	COG0674	911180	912364	-	[C] Pyruvate:ferredoxin oxidoreductase and related 2-oxoacid:ferredoxin oxidoreductases,
	PFDSM3638_04875.p01	CDS	COG1144	912377	912694	-	[C] Pyruvate:ferredoxin oxidoreductase and related 2-oxoacid:ferredoxin oxidoreductases,
	PFDSM3638_04880.p01	CDS	COG1014	912731	913288	-	[C] Pyruvate:ferredoxin oxidoreductase and related 2-oxoacid:ferredoxin oxidoreductases,
454
	PFDSM3638_04885.p01	CDS	COG3425	913527	914579	+	[I] 3-hydroxy-3-methylglutaryl CoA synthase
	PFDSM3638_04890.p01	CDS	COG0183	914593	915759	+	[I] Acetyl-CoA acetyltransferase
	PFDSM3638_04895.p01	CDS	COG1545	915761	916171	+	[R] Predicted nucleic-acid-binding protein containing a Zn-ribbon
	PFDSM3638_04900.p01	CDS	COG0680	916203	916655	+	[C] Ni,Fe-hydrogenase maturation factor
	PFDSM3638_04905.p01	CDS	COG2431	916657	916905	+	[S] Predicted membrane protein
	PFDSM3638_04910.p01	CDS	COG2431	916902	917495	+	[S] Predicted membrane protein
455
	PFDSM3638_04920.p01	CDS	COG2096	918456	918974	+	[S] Uncharacterized conserved protein
	PFDSM3638_04925.p01	CDS	COG1794	918971	919657	+	[M] Aspartate racemase
456
	PFDSM3638_04930.r01	tRNA	NA	919661	919738	-	NA
457
	PFDSM3638_04935.p01	CDS	COG2271	919905	921158	+	[G] Sugar phosphate permease
458
	PFDSM3638_04940.p01	CDS	COG1711	921115	921675	-	[S] Uncharacterized protein conserved in archaea
	PFDSM3638_04945.p01	CDS	NA	921712	922461	-	NA
	PFDSM3638_04950.p01	CDS	NA	922451	922630	-	NA
	PFDSM3638_04955.p01	CDS	COG1594	922612	922944	-	[K] DNA-directed RNA polymerase, subunit M/Transcription elongation
459
	PFDSM3638_04960.p01	CDS	COG2178	923032	923655	+	[J] Predicted RNA-binding protein of the translin
	PFDSM3638_04965.p01	CDS	COG1515	923642	924217	+	[L] Deoxyinosine 3'endonuclease (endonuclease V)
	PFDSM3638_04970.p01	CDS	COG1339	924204	924842	+	[KH] Transcriptional regulator of a riboflavin/FAD biosynthetic
460
	PFDSM3638_04975.p01	CDS	COG0016	925061	926560	+	[J] Phenylalanyl-tRNA synthetase alpha subunit
	PFDSM3638_04980.p01	CDS	COG0072	926571	928241	+	[J] Phenylalanyl-tRNA synthetase beta subunit
461
	PFDSM3638_04985.p01	CDS	COG1063	928411	929457	-	[ER] Threonine dehydrogenase and related Zn-dependent dehydrogenases
462
	PFDSM3638_04990.p01	CDS	COG2064	929537	930466	-	[NU] Flp pilus assembly protein TadC
	PFDSM3638_04995.p01	CDS	COG2064	930477	931544	-	[NU] Flp pilus assembly protein TadC
	PFDSM3638_05000.p01	CDS	COG4962	931557	934982	-	[U] Flp pilus assembly protein, ATPase CpaF
	PFDSM3638_05005.p01	CDS	ROG7869	934991	935920	-	NA
	PFDSM3638_05010.p01	CDS	COG1627	935925	937334	-	[S] Uncharacterized protein conserved in archaea
463
	PFDSM3638_05015.p01	CDS	ROG3378	937460	937795	+	NA
	PFDSM3638_05020.p01	CDS	COG1161	937749	938816	+	[R] Predicted GTPases
464
	PFDSM3638_05025.p01	CDS	COG1173	938929	940062	-	[EP] ABC-type dipeptide/oligopeptide/nickel transport systems, permease components
	PFDSM3638_05030.p01	CDS	COG0601	940064	941095	-	[EP] ABC-type dipeptide/oligopeptide/nickel transport systems, permease components
465
	PFDSM3638_05035.p01	CDS	COG0116	941225	942322	+	[L] Predicted N6-adenine-specific DNA methylase
466
	PFDSM3638_05040.p01	CDS	COG0226	942417	943544	+	[P] ABC-type phosphate transport system, periplasmic component
	PFDSM3638_05045.p01	CDS	COG1785	943558	945042	+	[P] Alkaline phosphatase
	PFDSM3638_05050.p01	CDS	COG1082	945076	945918	+	[G] Sugar phosphate isomerases/epimerases
	PFDSM3638_05055.p01	CDS	COG0573	945915	946835	+	[P] ABC-type phosphate transport system, permease component
	PFDSM3638_05060.p01	CDS	COG0581	946783	947652	+	[P] ABC-type phosphate transport system, permease component
	PFDSM3638_05065.p01	CDS	COG1117	947649	948410	+	[P] ABC-type phosphate transport system, ATPase component
	PFDSM3638_05070.p01	CDS	COG0704	948407	949000	+	[P] Phosphate uptake regulator
	PFDSM3638_05075.p01	CDS	COG0704	949063	949602	+	[P] Phosphate uptake regulator
467
	PFDSM3638_05080.p01	CDS	COG1131	949706	950590	+	[V] ABC-type multidrug transport system, ATPase component
	PFDSM3638_05085.p01	CDS	COG1277	950587	951768	+	[R] ABC-type transport system involved in multi-copper
468
	PFDSM3638_05090.p01	CDS	COG2839	952059	952448	+	[S] Uncharacterized protein conserved in bacteria
469
	PFDSM3638_05095.p01	CDS	COG2834	952453	953013	-	[M] Outer membrane lipoprotein-sorting protein
	PFDSM3638_05100.p01	CDS	NA	953010	953324	-	NA
	PFDSM3638_05105.p01	CDS	COG0675	953339	954553	-	[L] Transposase and inactivated derivatives
470
	PFDSM3638_05110.p01	CDS	COG0179	955132	955815	-	[Q] 2-keto-4-pentenoate hydratase/2-oxohepta-3-ene-1,7-dioic acid hydratase (catechol pathway)
	PFDSM3638_05115.p01	CDS	COG0388	955821	956609	-	[R] Predicted amidohydrolase
471
	PFDSM3638_05120.p01	CDS	COG1407	957019	957672	+	[R] Predicted ICC-like phosphoesterases
472
	PFDSM3638_05125.p01	CDS	COG0306	957744	958982	+	[P] Phosphate/sulphate permeases
	PFDSM3638_05130.p01	CDS	COG1392	958987	959655	+	[P] Phosphate transport regulator (distant homolog of
473
	PFDSM3638_05135.p01	CDS	ROG3776	959662	959889	-	NA
474
	PFDSM3638_05140.p01	CDS	COG3316	959956	960657	-	[L] Transposase and inactivated derivatives
475
	PFDSM3638_05145.p01	CDS	COG0215	960790	962223	+	[J] Cysteinyl-tRNA synthetase
476
	PFDSM3638_05150.p01	CDS	COG5580	962220	963278	-	[O] Activator of HSP90 ATPase
477
	PFDSM3638_05155.p01	CDS	COG0281	963366	964673	-	[C] Malic enzyme
	PFDSM3638_05160.p01	CDS	COG1041	964720	965841	-	[L] Predicted DNA modification methylase
478
	PFDSM3638_05165.p01	CDS	NA	965945	966907	+	NA
	PFDSM3638_05170.p01	CDS	COG2512	966912	967760	+	[S] Uncharacterized membrane-associated protein/domain
479
	PFDSM3638_05175.p01	CDS	COG0143	967836	970010	+	[J] Methionyl-tRNA synthetase
480
	PFDSM3638_05180.p01	CDS	COG1324	970003	970314	-	[P] Uncharacterized protein involved in tolerance to
	PFDSM3638_05185.p01	CDS	COG1499	970320	971483	-	[J] NMD protein affecting ribosome stability and
481
	PFDSM3638_05190.p01	CDS	COG0450	971552	972202	-	[O] Peroxiredoxin
482
	PFDSM3638_05195.p01	CDS	COG0461	972337	972885	-	[F] Orotate phosphoribosyltransferase
483
	PFDSM3638_05200.p01	CDS	COG2139	973084	973377	+	[J] Ribosomal protein L21E
	PFDSM3638_05205.p01	CDS	COG1460	973384	973746	+	[S] Uncharacterized protein conserved in archaea
484
	PFDSM3638_05210.p01	CDS	NA	973844	974062	+	NA
485
	PFDSM3638_05215.p01	CDS	COG0419	974051	974668	-	[L] ATPase involved in DNA repair
486
	PFDSM3638_05220.p01	CDS	COG1646	974739	975494	+	[R] Predicted phosphate-binding enzymes, TIM-barrel fold
	PFDSM3638_05225.p01	CDS	COG1833	975491	975919	+	[S] Uncharacterized conserved protein
487
	PFDSM3638_05230.p01	CDS	COG1855	975873	977681	-	[R] ATPase (PilT family)
488
	PFDSM3638_05235.p01	CDS	ROG6821	977780	978382	+	NA
489
	PFDSM3638_05240.p01	CDS	COG0467	978468	979688	+	[T] RecA-superfamily ATPases implicated in signal transduction
490
	PFDSM3638_05245.p01	CDS	COG4345	979691	980137	-	[S] Uncharacterized protein conserved in archaea
491
	PFDSM3638_05250.p01	CDS	COG0563	980197	980859	+	[F] Adenylate kinase and related kinases
	PFDSM3638_05255.p01	CDS	COG1370	980897	982654	+	[O] Prefoldin, molecular chaperone implicated in de
	PFDSM3638_05260.p01	CDS	COG2383	982692	982991	+	[S] Uncharacterized conserved protein
492
	PFDSM3638_05265.p01	CDS	COG1524	982971	984095	-	[R] Uncharacterized proteins of the AP superfamily
493
	PFDSM3638_05270.p01	CDS	COG1313	984197	985210	+	[R] Uncharacterized Fe-S protein PflX, homolog of
	PFDSM3638_05275.p01	CDS	COG1430	985216	985566	+	[S] Uncharacterized conserved protein
	PFDSM3638_05280.p01	CDS	COG1201	985594	988194	+	[R] Lhr-like helicases
494
	PFDSM3638_05285.p01	CDS	COG0527	988334	989455	+	[E] Aspartokinases
	PFDSM3638_05290.p01	CDS	COG0527	989466	990545	+	[E] Aspartokinases
	PFDSM3638_05295.p01	CDS	COG0083	990496	991374	+	[E] Homoserine kinase
	PFDSM3638_05300.p01	CDS	COG0498	991365	992549	+	[E] Threonine synthase
	PFDSM3638_05305.p01	CDS	COG0136	992546	993550	+	[E] Aspartate-semialdehyde dehydrogenase
	PFDSM3638_05310.p01	CDS	COG0126	993757	994989	+	[G] 3-phosphoglycerate kinase
	PFDSM3638_05315.p01	CDS	COG1213	995045	996313	+	[M] Predicted sugar nucleotidyltransferases
	PFDSM3638_05320.p01	CDS	COG0500	996306	997481	+	[QR] SAM-dependent methyltransferases
495
	PFDSM3638_05325.p01	CDS	COG1779	997450	998073	-	[R] C4-type Zn-finger protein
496
	PFDSM3638_05330.p01	CDS	COG2104	998145	998348	+	[H] Sulfur transfer protein involved in thiamine
497
	PFDSM3638_05335.p01	CDS	COG3269	998440	998712	+	[R] Predicted RNA-binding protein, contains TRAM domain
	PFDSM3638_05340.p01	CDS	COG1736	998744	999778	+	[J] Diphthamide synthase subunit DPH2
	PFDSM3638_05345.p01	CDS	NA	999741	1000142	+	NA
498
	PFDSM3638_05350.p01	CDS	COG0327	1000137	1000895	-	[S] Uncharacterized conserved protein
499
	PFDSM3638_05355.p01	CDS	COG0520	1000952	1002112	+	[E] Selenocysteine lyase
500
	PFDSM3638_05360.p01	CDS	COG2007	1002763	1003146	+	[J] Ribosomal protein S8E
	PFDSM3638_05365.p01	CDS	COG1310	1003124	1003546	+	[R] Predicted metal-dependent protease of the PAD1/JAB1
	PFDSM3638_05370.p01	CDS	COG0367	1003632	1005047	+	[E] Asparagine synthase (glutamine-hydrolyzing)
501
	PFDSM3638_05375.p01	CDS	COG0640	1005174	1005587	+	[K] Predicted transcriptional regulators
	PFDSM3638_05380.p01	CDS	ROG4242	1005580	1006872	+	NA
	PFDSM3638_05385.p01	CDS	COG3595	1006874	1007518	+	[S] Uncharacterized conserved protein
	PFDSM3638_05390.p01	CDS	COG0730	1007554	1008276	+	[R] Predicted permeases
	PFDSM3638_05395.p01	CDS	COG0312	1008360	1009781	+	[R] Predicted Zn-dependent proteases and their inactivated
	PFDSM3638_05400.p01	CDS	COG0312	1009793	1011115	+	[R] Predicted Zn-dependent proteases and their inactivated
502
	PFDSM3638_05410.p01	CDS	NA	1012694	1013416	+	NA
	PFDSM3638_05415.p01	CDS	ROG4154	1013421	1013783	+	NA
503
	PFDSM3638_05420.p01	CDS	COG1233	1014483	1015724	-	[Q] Phytoene dehydrogenase and related proteins
	PFDSM3638_05425.p01	CDS	COG1019	1015721	1016203	-	[R] Predicted nucleotidyltransferase
504
	PFDSM3638_05430.p01	CDS	COG1042	1016250	1017578	+	[C] Acyl-CoA synthetase (NDP forming)
505
	PFDSM3638_05435.p01	CDS	NA	1017565	1017789	-	NA
506
	PFDSM3638_05440.p01	CDS	COG2090	1017896	1018318	-	[S] Uncharacterized protein conserved in archaea
	PFDSM3638_05445.p01	CDS	COG2118	1018342	1018680	-	[R] DNA-binding protein
	PFDSM3638_05450.p01	CDS	ROG5220	1018714	1019016	-	NA
	PFDSM3638_05455.p01	CDS	NA	1019016	1019522	-	NA
	PFDSM3638_05460.p01	CDS	COG4133	1019583	1020191	-	[O] ABC-type transport system involved in cytochrome
	PFDSM3638_05465.p01	CDS	NA	1020188	1020616	-	NA
	PFDSM3638_05470.p01	CDS	NA	1020618	1021748	-	NA
	PFDSM3638_05475.p01	CDS	NA	1021745	1022020	-	NA
507
	PFDSM3638_05480.p01	CDS	NA	1022237	1022518	+	NA
	PFDSM3638_05485.p01	CDS	ROG8082	1022515	1022826	+	NA
508
	PFDSM3638_05490.p01	CDS	COG0060	1023020	1026220	-	[J] Isoleucyl-tRNA synthetase
509
	PFDSM3638_05495.p01	CDS	COG1672	1026350	1027414	-	[R] Predicted ATPase (AAA+ superfamily)
	PFDSM3638_05500.p01	CDS	COG1590	1027457	1028059	-	[S] Uncharacterized conserved protein
510
	PFDSM3638_05505.p01	CDS	COG2421	1028046	1028990	+	[C] Predicted acetamidase/formamidase
511
	PFDSM3638_05510.p01	CDS	NA	1029424	1030410	+	NA
512
	PFDSM3638_05515.p01	CDS	COG0595	1030507	1031826	+	[R] Predicted hydrolase of the metallo-beta-lactamase superfamily
	PFDSM3638_05520.p01	CDS	COG0142	1031840	1032862	+	[H] Geranylgeranyl pyrophosphate synthase
	PFDSM3638_05525.p01	CDS	COG0061	1032926	1033759	+	[G] Predicted sugar kinase
513
	PFDSM3638_05530.p01	CDS	COG0460	1033760	1034722	-	[E] Homoserine dehydrogenase
514
	PFDSM3638_05535.p01	CDS	COG1335	1034830	1035366	+	[Q] Amidases related to nicotinamidase
515
	PFDSM3638_05540.p01	CDS	ROG0997	1035353	1036333	-	NA
	PFDSM3638_05545.p01	CDS	COG0537	1036323	1036763	-	[FGR] Diadenosine tetraphosphate (Ap4A) hydrolase and other
516
	PFDSM3638_05550.r01	tRNA	NA	1036856	1036933	+	NA
	PFDSM3638_05555.p01	CDS	COG2819	1036957	1038171	+	[R] Predicted hydrolase of the alpha/beta superfamily
517
	PFDSM3638_05560.p01	CDS	COG1572	1038245	1041643	+	[S] Uncharacterized conserved protein
518
	PFDSM3638_05565.p01	CDS	COG1568	1041682	1042731	-	[R] Predicted methyltransferases
519
	PFDSM3638_05570.p01	CDS	ROG1327	1042876	1043706	-	NA
	PFDSM3638_05575.p01	CDS	NA	1043707	1043904	-	NA
520
	PFDSM3638_05580.p01	CDS	ROG1693	1044213	1044803	+	NA
	PFDSM3638_05585.p01	CDS	COG0284	1044800	1045435	+	[F] Orotidine-5'-phosphate decarboxylase
	PFDSM3638_05590.p01	CDS	COG2016	1045420	1045938	+	[J] Predicted RNA-binding protein (contains PUA domain)
	PFDSM3638_05595.p01	CDS	COG0615	1045917	1046363	+	[MI] Cytidylyltransferase
521
	PFDSM3638_05600.p01	CDS	COG1343	1049355	1049612	+	[L] Uncharacterized protein predicted to be involved
522
	PFDSM3638_05605.p01	CDS	COG1518	1049609	1050577	-	[L] Uncharacterized protein predicted to be involved
	PFDSM3638_05610.p01	CDS	COG1468	1050582	1051091	-	[L] RecB family exonuclease
	PFDSM3638_05615.p01	CDS	COG1203	1051091	1053265	-	[R] Predicted helicases
	PFDSM3638_05620.p01	CDS	COG1688	1053262	1053891	-	[L] Uncharacterized protein predicted to be involved
	PFDSM3638_05625.p01	CDS	COG1857	1053902	1054957	-	[L] Uncharacterized protein predicted to be involved
	PFDSM3638_05630.p01	CDS	ROG3240	1054954	1056291	-	NA
	PFDSM3638_05635.p01	CDS	COG1604	1056284	1057306	-	[L] Uncharacterized protein predicted to be involved
	PFDSM3638_05640.p01	CDS	COG3337	1057290	1057799	-	[L] Uncharacterized protein predicted to be involved
	PFDSM3638_05645.p01	CDS	COG1336	1057777	1058664	-	[L] Uncharacterized protein predicted to be involved
	PFDSM3638_05650.p01	CDS	COG1517	1058661	1060103	-	[L] Uncharacterized protein predicted to be involved
	PFDSM3638_05655.p01	CDS	COG1769	1060094	1061062	-	[L] Uncharacterized protein predicted to be involved
	PFDSM3638_05660.p01	CDS	COG1353	1061059	1063674	-	[R] Predicted hydrolase of the HD superfamily
	PFDSM3638_05665.p01	CDS	COG1367	1063667	1064680	-	[L] Uncharacterized protein predicted to be involved
523
	PFDSM3638_05670.p01	CDS	COG1583	1064798	1065592	-	[L] Uncharacterized protein predicted to be involved
524
	PFDSM3638_05675.p01	CDS	COG2192	1065701	1067311	-	[O] Predicted carbamoyl transferase, NodU family
	PFDSM3638_05680.p01	CDS	ROG5096	1067344	1067550	-	NA
525
	PFDSM3638_05685.p01	CDS	COG1936	1067685	1068227	+	[F] Predicted nucleotide kinase (related to CMP
	PFDSM3638_05690.p01	CDS	COG0501	1068230	1069099	+	[O] Zn-dependent protease with chaperone function
526
	PFDSM3638_05695.p01	CDS	COG5584	1069172	1071295	+	[S] Predicted small secreted protein
527
	PFDSM3638_05700.p01	CDS	COG0532	1071329	1074283	-	[J] Translation initiation factor 2 (IF-2; GTPase)
528
	PFDSM3638_05705.p01	CDS	COG0043	1075664	1076926	-	[H] 3-polyprenyl-4-hydroxybenzoate decarboxylase and related decarboxylases
	PFDSM3638_05710.p01	CDS	COG1258	1076907	1078073	-	[J] Predicted pseudouridylate synthase
529
	PFDSM3638_05715.p01	CDS	COG1093	1078139	1078966	+	[J] Translation initiation factor 2, alpha subunit
	PFDSM3638_05720.p01	CDS	COG2260	1078972	1079154	+	[J] Predicted Zn-ribbon RNA-binding protein
	PFDSM3638_05725.p01	CDS	COG2047	1079151	1079954	+	[R] Uncharacterized protein (ATP-grasp superfamily)
	PFDSM3638_05730.p01	CDS	COG0413	1079983	1080834	+	[H] Ketopantoate hydroxymethyltransferase
530
	PFDSM3638_05735.p01	CDS	COG0697	1080824	1081627	-	[GER] Permeases of the drug/metabolite transporter (DMT)
	PFDSM3638_05740.p01	CDS	COG0489	1081611	1082498	-	[D] ATPases involved in chromosome partitioning
531
	PFDSM3638_05745.p01	CDS	NA	1082626	1082823	+	NA
532
	PFDSM3638_05750.p01	CDS	COG0651	1082832	1084295	-	[CP] Formate hydrogenlyase subunit 3/Multisubunit Na+/H+ antiporter,
	PFDSM3638_05755.p01	CDS	COG1006	1084292	1084564	-	[P] Multisubunit Na+/H+ antiporter, MnhC subunit
	PFDSM3638_05760.p01	CDS	COG2111	1084567	1084950	-	[P] Multisubunit Na+/H+ antiporter, MnhB subunit
	PFDSM3638_05765.p01	CDS	COG2111	1084950	1085417	-	[P] Multisubunit Na+/H+ antiporter, MnhB subunit
	PFDSM3638_05770.p01	CDS	COG1320	1085398	1085712	-	[P] Multisubunit Na+/H+ antiporter, MnhG subunit
	PFDSM3638_05775.p01	CDS	COG2212	1085709	1085978	-	[P] Multisubunit Na+/H+ antiporter, MnhF subunit
	PFDSM3638_05780.p01	CDS	COG1863	1085954	1086559	-	[P] Multisubunit Na+/H+ antiporter, MnhE subunit
	PFDSM3638_05785.p01	CDS	COG0846	1086556	1087308	-	[K] NAD-dependent protein deacetylases, SIR2 family
533
	PFDSM3638_05790.p01	CDS	ROG3523	1087384	1087911	+	NA
534
	PFDSM3638_05795.p01	CDS	COG1850	1087913	1089175	-	[G] Ribulose 1,5-bisphosphate carboxylase, large subunit
535
	PFDSM3638_05800.p01	CDS	COG1824	1089279	1090445	+	[P] Permease, similar to cation transporters
536
	PFDSM3638_05805.p01	CDS	COG1856	1090438	1091262	-	[S] Uncharacterized homolog of biotin synthetase
	PFDSM3638_05810.p01	CDS	COG0076	1091259	1092407	-	[E] Glutamate decarboxylase and related PLP-dependent proteins
	PFDSM3638_05815.p01	CDS	COG0170	1092407	1093015	-	[I] Dolichol kinase
	PFDSM3638_05820.p01	CDS	COG1011	1093049	1093684	-	[R] Predicted hydrolase (HAD superfamily)
537
	PFDSM3638_05825.p01	CDS	COG2034	1093738	1093989	+	[S] Predicted membrane protein
	PFDSM3638_05830.p01	CDS	ROG1113	1093991	1095172	+	NA
	PFDSM3638_05835.p01	CDS	COG0433	1095193	1096848	+	[R] Predicted ATPase
	PFDSM3638_05840.p01	CDS	COG0420	1096864	1098150	+	[L] DNA repair exonuclease
	PFDSM3638_05845.p01	CDS	COG0419	1098147	1100795	+	[L] ATPase involved in DNA repair
	PFDSM3638_05850.p01	CDS	COG1630	1100792	1102147	+	[S] Uncharacterized protein conserved in archaea
	PFDSM3638_05855.p01	CDS	ROG0631	1102166	1102465	+	NA
538
	PFDSM3638_05860.p01	CDS	NA	1102490	1102759	-	NA
	PFDSM3638_05865.p01	CDS	ROG7618	1102753	1103328	-	NA
539
	PFDSM3638_05870.r01	tRNA	NA	1103638	1103715	+	NA
	PFDSM3638_05875.p01	CDS	COG2265	1103737	1104972	+	[J] SAM-dependent methyltransferases related to tRNA (uracil-5-)-methyltransferase
540
	PFDSM3638_05880.p01	CDS	ROG0035	1104955	1105347	-	NA
541
	PFDSM3638_05885.p01	CDS	COG2886	1105401	1105814	+	[S] Uncharacterized small protein
	PFDSM3638_05890.p01	CDS	COG0500	1105814	1106446	+	[QR] SAM-dependent methyltransferases
	PFDSM3638_05895.p01	CDS	COG3082	1106447	1106740	+	[S] Uncharacterized protein conserved in bacteria
	PFDSM3638_05900.p01	CDS	COG2262	1106764	1108056	+	[R] GTPases
542
	PFDSM3638_05905.p01	CDS	COG0306	1108040	1108981	-	[P] Phosphate/sulphate permeases
543
	PFDSM3638_05910.p01	CDS	COG1321	1109044	1109247	-	[K] Mn-dependent transcriptional regulator
544
	PFDSM3638_05915.p01	CDS	COG0498	1109321	1110472	+	[E] Threonine synthase
545
	PFDSM3638_05920.p01	CDS	ROG2822	1110475	1111809	-	NA
546
	PFDSM3638_05925.p01	CDS	ROG4594	1111977	1112486	-	NA
	PFDSM3638_05930.p01	CDS	NA	1112529	1112915	-	NA
	PFDSM3638_05935.p01	CDS	COG1801	1112946	1113668	-	[S] Uncharacterized conserved protein
547
	PFDSM3638_05940.p01	CDS	COG0624	1113828	1114880	+	[E] Acetylornithine deacetylase/Succinyl-diaminopimelate desuccinylase and related deacylases
548
	PFDSM3638_05945.p01	CDS	COG0446	1114877	1116205	-	[R] Uncharacterized NAD(FAD)-dependent dehydrogenases
	PFDSM3638_05950.p01	CDS	COG2441	1116264	1117331	-	[C] Predicted butyrate kinase
549
	PFDSM3638_05955.p01	CDS	COG0469	1117396	1118820	+	[G] Pyruvate kinase
	PFDSM3638_05960.p01	CDS	COG0489	1118831	1119154	+	[D] ATPases involved in chromosome partitioning
	PFDSM3638_05965.p01	CDS	COG1633	1119192	1119716	+	[S] Uncharacterized conserved protein
550
	PFDSM3638_05970.p01	CDS	COG1633	1119720	1120757	-	[S] Uncharacterized conserved protein
551
	PFDSM3638_05975.p01	CDS	COG2406	1120837	1121394	-	[R] Protein distantly related to bacterial ferritins
552
	PFDSM3638_05980.p01	CDS	COG0735	1121500	1121883	+	[P] Fe2+/Zn2+ uptake regulation proteins
553
	PFDSM3638_05985.p01	CDS	COG1633	1121891	1122370	-	[S] Uncharacterized conserved protein
554
	PFDSM3638_05990.p01	CDS	COG1633	1122466	1123020	+	[S] Uncharacterized conserved protein
	PFDSM3638_05995.p01	CDS	COG0446	1123025	1124104	+	[R] Uncharacterized NAD(FAD)-dependent dehydrogenases
555
	PFDSM3638_06000.p01	CDS	COG1489	1124087	1124779	-	[R] DNA-binding protein, stimulates sugar fermentation
	PFDSM3638_06005.p01	CDS	COG1633	1124782	1125306	-	[S] Uncharacterized conserved protein
556
	PFDSM3638_06010.p01	CDS	COG3316	1125372	1126073	-	[L] Transposase and inactivated derivatives
557
	PFDSM3638_06015.p01	CDS	COG4072	1126200	1126694	-	[S] Uncharacterized protein conserved in archaea
558
	PFDSM3638_06020.p01	CDS	COG2414	1126870	1128729	+	[C] Aldehyde:ferredoxin oxidoreductase
	PFDSM3638_06025.p01	CDS	COG0172	1128802	1130169	+	[J] Seryl-tRNA synthetase
	PFDSM3638_06030.p01	CDS	COG1439	1130166	1130633	+	[R] Predicted nucleic acid-binding protein, consists of
559
	PFDSM3638_06035.p01	CDS	ROG1451	1130630	1131100	-	NA
	PFDSM3638_06040.p01	CDS	ROG5809	1131097	1131327	-	NA
	PFDSM3638_06045.p01	CDS	COG2723	1131331	1132863	-	[G] Beta-glucosidase/6-phospho-beta-glucosidase/beta-galactosidase
560
	PFDSM3638_06050.p01	CDS	COG0747	1133035	1134903	+	[E] ABC-type dipeptide transport system, periplasmic component
	PFDSM3638_06055.p01	CDS	COG0601	1134974	1135960	+	[EP] ABC-type dipeptide/oligopeptide/nickel transport systems, permease components
	PFDSM3638_06060.p01	CDS	COG1173	1135965	1136897	+	[EP] ABC-type dipeptide/oligopeptide/nickel transport systems, permease components
	PFDSM3638_06065.p01	CDS	COG0444	1136899	1137867	+	[EP] ABC-type dipeptide/oligopeptide/nickel transport system, ATPase component
	PFDSM3638_06070.p01	CDS	COG1123	1137860	1138810	+	[R] ATPase components of various ABC-type transport
561
	PFDSM3638_06075.p01	CDS	COG1855	1138994	1139491	-	[R] ATPase (PilT family)
562
	PFDSM3638_06080.p01	CDS	ROG4134	1139830	1140084	-	NA
563
	PFDSM3638_06090.p01	CDS	COG0438	1141092	1141478	+	[M] Glycosyltransferase
	PFDSM3638_06095.p01	CDS	COG1287	1141417	1141794	+	[R] Uncharacterized membrane protein, required for N-linked
564
	PFDSM3638_06100.p01	CDS	COG3379	1141745	1141927	-	[S] Uncharacterized conserved protein
565
	PFDSM3638_06110.p01	CDS	COG1753	1143094	1143330	+	[S] Uncharacterized conserved protein
	PFDSM3638_06115.p01	CDS	COG1487	1143303	1143674	+	[R] Predicted nucleic acid-binding protein, contains PIN
566
	PFDSM3638_06125.p01	CDS	COG3316	1144975	1145676	+	[L] Transposase and inactivated derivatives
567
	PFDSM3638_06130.p01	CDS	COG0705	1145739	1146320	+	[R] Uncharacterized membrane protein (homolog of Drosophila
568
	PFDSM3638_06135.p01	CDS	COG0177	1146317	1146994	-	[L] Predicted EndoIII-related endonuclease
	PFDSM3638_06140.p01	CDS	NA	1146957	1147409	-	NA
	PFDSM3638_06145.p01	CDS	COG1522	1147393	1147839	-	[K] Transcriptional regulators
569
	PFDSM3638_06150.p01	CDS	COG0160	1147962	1149293	+	[E] 4-aminobutyrate aminotransferase and related aminotransferases
570
	PFDSM3638_06155.p01	CDS	ROG1669	1149940	1152093	-	NA
	PFDSM3638_06160.p01	CDS	COG3325	1152131	1153168	-	[G] Chitinase
571
	PFDSM3638_06165.p01	CDS	COG0239	1153497	1153868	+	[D] Integral membrane protein possibly involved in
	PFDSM3638_06170.p01	CDS	COG1993	1153874	1154254	+	[S] Uncharacterized conserved protein
572
	PFDSM3638_06175.p01	CDS	COG1504	1154316	1154672	+	[S] Uncharacterized conserved protein
	PFDSM3638_06180.p01	CDS	COG2401	1154717	1156615	+	[R] ABC-type ATPase fused to a predicted
573
	PFDSM3638_06185.p01	CDS	ROG3471	1156612	1157070	-	NA
574
	PFDSM3638_06190.p01	CDS	COG2233	1157142	1158425	+	[F] Xanthine/uracil permeases
	PFDSM3638_06195.p01	CDS	COG0035	1158430	1159128	+	[F] Uracil phosphoribosyltransferase
575
	PFDSM3638_06200.p01	CDS	COG0243	1159097	1161022	-	[C] Anaerobic dehydrogenases, typically selenocysteine-containing
	PFDSM3638_06205.p01	CDS	ROG6037	1161038	1161325	-	NA
	PFDSM3638_06210.p01	CDS	COG3981	1161328	1161606	-	[R] Predicted acetyltransferase
576
	PFDSM3638_06215.p01	CDS	ROG0563	1161780	1163249	+	NA
	PFDSM3638_06220.p01	CDS	COG0665	1163255	1164403	+	[E] Glycine/D-amino acid oxidases (deaminating)
577
	PFDSM3638_06225.p01	CDS	COG1277	1164555	1165505	+	[R] ABC-type transport system involved in multi-copper
578
	PFDSM3638_06230.p01	CDS	ROG7944	1165476	1165919	-	NA
	PFDSM3638_06230.p01_2	CDS	ROG7944	1165922	1166347	-	NA
579
	PFDSM3638_06235.p01	CDS	COG1131	1166468	1167394	+	[V] ABC-type multidrug transport system, ATPase component
	PFDSM3638_06240.p01	CDS	COG1470	1167391	1169589	+	[S] Predicted membrane protein
	PFDSM3638_06245.p01	CDS	COG1277	1169593	1170582	+	[R] ABC-type transport system involved in multi-copper
580
	PFDSM3638_06250.p01	CDS	COG0436	1170575	1171744	-	[E] Aspartate/tyrosine/aromatic aminotransferase
581
	PFDSM3638_06255.p01	CDS	COG0733	1171912	1173474	+	[R] Na+-dependent transporters of the SNF family
582
	PFDSM3638_06260.p01	CDS	ROG4263	1173631	1174365	+	NA
583
	PFDSM3638_06265.p01	CDS	COG0144	1174362	1175294	-	[J] tRNA and rRNA cytosine-C5-methylases
	PFDSM3638_06270.p01	CDS	COG0120	1175296	1175985	-	[G] Ribose 5-phosphate isomerase
	PFDSM3638_06275.p01	CDS	COG1589	1175989	1176312	-	[M] Cell division septal protein
	PFDSM3638_06280.p01	CDS	ROG4214	1176363	1177277	-	NA
	PFDSM3638_06285.p01	CDS	ROG5042	1177279	1177851	-	NA
584
	PFDSM3638_06290.p01	CDS	COG1756	1177898	1178569	+	[S] Uncharacterized conserved protein
	PFDSM3638_06295.p01	CDS	COG0733	1178631	1180004	+	[R] Na+-dependent transporters of the SNF family
585
	PFDSM3638_06300.p01	CDS	COG0231	1180066	1180482	+	[J] Translation elongation factor P (EF-P)/translation initiation
586
	PFDSM3638_06305.p01	CDS	COG0144	1180503	1181855	-	[J] tRNA and rRNA cytosine-C5-methylases
587
	PFDSM3638_06310.p01	CDS	COG0626	1181997	1183097	+	[E] Cystathionine beta-lyases/cystathionine gamma-synthases
	PFDSM3638_06315.p01	CDS	ROG0969	1183100	1184122	+	NA
	PFDSM3638_06320.p01	CDS	COG0620	1184135	1185064	+	[E] Methionine synthase II (cobalamin-independent)
	PFDSM3638_06325.p01	CDS	COG0620	1185066	1186082	+	[E] Methionine synthase II (cobalamin-independent)
588
	PFDSM3638_06330.p01	CDS	NA	1186079	1186978	-	NA
589
	PFDSM3638_06335.r01	tRNA	NA	1187037	1187124	+	NA
590
	PFDSM3638_06340.p01	CDS	NA	1187213	1187524	-	NA
591
	PFDSM3638_06345.p01	CDS	COG1540	1187908	1188675	+	[R] Uncharacterized proteins, homologs of lactam utilization
	PFDSM3638_06350.p01	CDS	COG2049	1188672	1189355	+	[E] Allophanate hydrolase subunit 1
	PFDSM3638_06355.p01	CDS	COG1984	1189348	1190337	+	[E] Allophanate hydrolase subunit 2
	PFDSM3638_06360.p01	CDS	COG2412	1190373	1190681	+	[S] Uncharacterized conserved protein
592
	PFDSM3638_06365.p01	CDS	NA	1190678	1190959	-	NA
	PFDSM3638_06370.p01	CDS	COG0602	1190960	1191721	-	[O] Organic radical activating enzymes
	PFDSM3638_06375.p01	CDS	COG0720	1191718	1192062	-	[H] 6-pyruvoyl-tetrahydropterin synthase
	PFDSM3638_06380.p01	CDS	COG0197	1192103	1192648	-	[J] Ribosomal protein L16/L10E
593
	PFDSM3638_06385.p01	CDS	NA	1192871	1193266	+	NA
594
	PFDSM3638_06390.p01	CDS	COG2033	1193517	1193891	-	[C] Desulfoferrodoxin
	PFDSM3638_06395.p01	CDS	COG1773	1193902	1194066	-	[C] Rubredoxin
	PFDSM3638_06400.p01	CDS	COG1592	1194143	1194658	-	[C] Rubrerythrin
595
	PFDSM3638_06405.p01	CDS	COG2036	1194763	1194942	-	[B] Histones H3 and H4
596
	PFDSM3638_06410.p01	CDS	COG0719	1195072	1196163	-	[O] ABC-type transport system involved in Fe-S
	PFDSM3638_06415.p01	CDS	COG0719	1196163	1197590	-	[O] ABC-type transport system involved in Fe-S
	PFDSM3638_06420.p01	CDS	COG0396	1197580	1198311	-	[O] ABC-type transport system involved in Fe-S
	PFDSM3638_06425.p01	CDS	COG0301	1198401	1199492	-	[H] Thiamine biosynthesis ATP pyrophosphatase
	PFDSM3638_06430.p01	CDS	COG0476	1199495	1200457	-	[H] Dinucleotide-utilizing enzymes involved in molybdopterin and
597
	PFDSM3638_06435.p01	CDS	COG5418	1200547	1201116	+	[S] Predicted secreted protein
598
	PFDSM3638_06440.p01	CDS	COG0622	1201179	1201937	+	[R] Predicted phosphoesterase
599
	PFDSM3638_06445.p01	CDS	COG2244	1201906	1203198	-	[R] Membrane protein involved in the export
600
	PFDSM3638_06450.p01	CDS	COG0442	1203266	1204705	+	[J] Prolyl-tRNA synthetase
	PFDSM3638_06455.p01	CDS	ROG3621	1204721	1205281	+	NA
	PFDSM3638_06460.p01	CDS	COG2101	1205330	1205905	+	[K] TATA-box binding protein (TBP), component of
	PFDSM3638_06465.p01	CDS	COG0294	1205910	1206734	+	[H] Dihydropteroate synthase and related enzymes
601
	PFDSM3638_06470.p01	CDS	COG1931	1206724	1207131	-	[S] Uncharacterized protein conserved in archaea
	PFDSM3638_06475.p01	CDS	COG1525	1207170	1207679	-	[L] Micrococcal nuclease (thermonuclease) homologs
	PFDSM3638_06480.p01	CDS	COG2039	1207676	1208302	-	[O] Pyrrolidone-carboxylate peptidase (N-terminal pyroglutamyl peptidase)
	PFDSM3638_06485.p01	CDS	COG1531	1208299	1208553	-	[S] Uncharacterized protein conserved in archaea
	PFDSM3638_06490.p01	CDS	COG0491	1208553	1209239	-	[R] Zn-dependent hydrolases, including glyoxylases
602
	PFDSM3638_06495.p01	CDS	COG0440	1209489	1209896	-	[E] Acetolactate synthase, small (regulatory) subunit
603
	PFDSM3638_06500.p01	CDS	COG4025	1209965	1210672	-	[S] Predicted membrane protein
	PFDSM3638_06505.p01	CDS	COG5306	1210682	1213168	-	[S] Uncharacterized conserved protein
	PFDSM3638_06510.p01	CDS	ROG3151	1213168	1215333	-	NA
	PFDSM3638_06515.p01	CDS	NA	1215330	1216784	-	NA
	PFDSM3638_06520.p01	CDS	NA	1216830	1217249	-	NA
604
	PFDSM3638_06525.p01	CDS	COG2880	1217366	1217569	+	[S] Uncharacterized protein conserved in archaea
605
	PFDSM3638_06530.p01	CDS	NA	1218303	1218572	-	NA
606
	PFDSM3638_06535.p01	CDS	NA	1218643	1220133	+	NA
607
	PFDSM3638_06540.p01	CDS	NA	1220281	1220664	+	NA
	PFDSM3638_06545.p01	CDS	COG1040	1220687	1221394	+	[R] Predicted amidophosphoribosyltransferases
	PFDSM3638_06550.p01	CDS	COG0758	1221396	1222049	+	[LU] Predicted Rossmann fold nucleotide-binding protein involved
608
	PFDSM3638_06555.p01	CDS	COG1432	1222254	1222811	+	[S] Uncharacterized conserved protein
	PFDSM3638_06560.p01	CDS	COG1479	1222869	1223126	+	[S] Uncharacterized conserved protein
	PFDSM3638_06565.p01	CDS	NA	1223142	1224512	+	NA
609
	PFDSM3638_06580.p01	CDS	NA	1225830	1226018	+	NA
610
	PFDSM3638_06585.p01	CDS	COG1373	1226216	1227622	+	[R] Predicted ATPase (AAA+ superfamily)
611
	PFDSM3638_06590.p01	CDS	COG1598	1227905	1228135	+	[S] Uncharacterized conserved protein
	PFDSM3638_06595.p01	CDS	ROG5650	1228132	1228359	+	NA
612
	PFDSM3638_06600.p01	CDS	COG2870	1228832	1229305	+	[M] ADP-heptose synthase, bifunctional sugar kinase/adenylyltransferase
	PFDSM3638_06605.p01	CDS	COG1814	1229311	1230399	+	[S] Uncharacterized membrane protein
613
	PFDSM3638_06610.p01	CDS	NA	1230396	1230896	-	NA
	PFDSM3638_06615.p01	CDS	COG0493	1230930	1232354	-	[ER] NADPH-dependent glutamate synthase beta chain and
	PFDSM3638_06620.p01	CDS	COG0543	1232355	1233191	-	[HC] 2-polyprenylphenol hydroxylase and related flavodoxin oxidoreductases
614
	PFDSM3638_06625.p01	CDS	COG1145	1233350	1234354	+	[C] Ferredoxin
	PFDSM3638_06630.p01	CDS	COG0543	1234351	1235217	+	[HC] 2-polyprenylphenol hydroxylase and related flavodoxin oxidoreductases
	PFDSM3638_06635.p01	CDS	COG1941	1235217	1235930	+	[C] Coenzyme F420-reducing hydrogenase, gamma subunit
	PFDSM3638_06640.p01	CDS	COG3259	1235933	1237171	+	[C] Coenzyme F420-reducing hydrogenase, alpha subunit
615
	PFDSM3638_06645.p01	CDS	COG0351	1237168	1238523	-	[H] Hydroxymethylpyrimidine/phosphomethylpyrimidine kinase
	PFDSM3638_06650.p01	CDS	COG0352	1238520	1239143	-	[H] Thiamine monophosphate synthase
	PFDSM3638_06655.p01	CDS	COG2145	1239140	1239937	-	[H] Hydroxyethylthiazole kinase, sugar kinase family
	PFDSM3638_06660.p01	CDS	COG1457	1239934	1241187	-	[F] Purine-cytosine permease and related proteins
	PFDSM3638_06665.p01	CDS	COG0819	1241180	1241818	-	[K] Putative transcription activator
	PFDSM3638_06670.p01	CDS	COG0819	1241808	1242452	-	[K] Putative transcription activator
616
	PFDSM3638_06675.p01	CDS	NA	1242545	1243216	-	NA
	PFDSM3638_06680.p01	CDS	NA	1243213	1243878	-	NA
617
	PFDSM3638_06685.p01	CDS	COG0404	1243975	1245171	-	[E] Glycine cleavage system T protein (aminomethyltransferase)
618
	PFDSM3638_06690.p01	CDS	NA	1245296	1245838	+	NA
619
	PFDSM3638_06695.p01	CDS	COG0006	1245830	1246876	-	[E] Xaa-Pro aminopeptidase
620
	PFDSM3638_06700.p01	CDS	COG3473	1247012	1247722	+	[Q] Maleate cis-trans isomerase
	PFDSM3638_06705.p01	CDS	COG1234	1247722	1248645	+	[R] Metal-dependent hydrolases of the beta-lactamase superfamily
	PFDSM3638_06710.p01	CDS	COG1916	1248623	1249291	+	[S] Uncharacterized homolog of PrgY (pheromone shutdown
621
	PFDSM3638_06715.p01	CDS	NA	1249255	1249521	-	NA
622
	PFDSM3638_06720.p01	CDS	NA	1249606	1249812	-	NA
623
	PFDSM3638_06725.p01	CDS	COG0182	1249948	1251018	+	[J] Predicted translation initiation factor 2B subunit,
624
	PFDSM3638_06730.p01	CDS	COG2211	1251125	1252411	+	[G] Na+/melibiose symporter and related transporters
625
	PFDSM3638_06735.p01	CDS	COG0441	1252354	1254231	-	[J] Threonyl-tRNA synthetase
626
	PFDSM3638_06740.p01	CDS	COG4113	1254303	1254707	-	[R] Predicted nucleic acid-binding protein, contains PIN
	PFDSM3638_06745.p01	CDS	ROG1176	1254694	1254915	-	NA
627
	PFDSM3638_06750.p01	CDS	COG2244	1255139	1256395	+	[R] Membrane protein involved in the export
	PFDSM3638_06755.p01	CDS	COG1004	1256405	1257688	+	[M] Predicted UDP-glucose 6-dehydrogenase
	PFDSM3638_06760.p01	CDS	COG1210	1257685	1258536	+	[M] UDP-glucose pyrophosphorylase
	PFDSM3638_06765.p01	CDS	COG0451	1258533	1259543	+	[MG] Nucleoside-diphosphate-sugar epimerases
	PFDSM3638_06770.p01	CDS	NA	1259544	1259777	+	NA
	PFDSM3638_06775.p01	CDS	COG0438	1259787	1260695	+	[M] Glycosyltransferase
	PFDSM3638_06780.p01	CDS	COG1216	1260719	1261624	+	[R] Predicted glycosyltransferases
	PFDSM3638_06785.p01	CDS	COG0438	1261621	1262718	+	[M] Glycosyltransferase
628
	PFDSM3638_06790.p01	CDS	COG0438	1262708	1263859	-	[M] Glycosyltransferase
	PFDSM3638_06795.p01	CDS	COG0438	1263868	1265106	-	[M] Glycosyltransferase
	PFDSM3638_06800.p01	CDS	COG0438	1265084	1266052	-	[M] Glycosyltransferase
	PFDSM3638_06805.p01	CDS	COG0438	1266049	1267170	-	[M] Glycosyltransferase
629
	PFDSM3638_06815.p01	CDS	COG3316	1267646	1268347	-	[L] Transposase and inactivated derivatives
630
	PFDSM3638_06820.p01	CDS	COG1358	1268501	1268872	+	[J] Ribosomal protein HS6-type (S12/L30/L7a)
	PFDSM3638_06825.p01	CDS	COG2053	1268919	1269134	+	[J] Ribosomal protein S28E/S33
	PFDSM3638_06830.p01	CDS	COG2075	1269140	1269340	+	[J] Ribosomal protein L24E
631
	PFDSM3638_06835.p01	CDS	COG1119	1269535	1269756	+	[P] ABC-type molybdenum transport system, ATPase component/photorepair
	PFDSM3638_06840.p01	CDS	COG0697	1269791	1270621	+	[GER] Permeases of the drug/metabolite transporter (DMT)
632
	PFDSM3638_06845.r01	tRNA	NA	1270622	1270699	-	NA
	PFDSM3638_06850.r01	tRNA	NA	1270706	1270781	-	NA
633
	PFDSM3638_06855.p01	CDS	NA	1271128	1271361	+	NA
634
	PFDSM3638_06865.p01	CDS	COG0053	1271601	1272455	+	[P] Predicted Co/Zn/Cd cation transporters
635
	PFDSM3638_06870.p01	CDS	COG0095	1272457	1273206	-	[H] Lipoate-protein ligase A
636
	PFDSM3638_06875.p01	CDS	COG5256	1273477	1274763	+	[J] Translation elongation factor EF-1alpha (GTPase)
	PFDSM3638_06880.p01	CDS	COG0051	1274803	1275111	+	[J] Ribosomal protein S10
	PFDSM3638_06885.r01	tRNA	NA	1275149	1275235	+	NA
637
	PFDSM3638_06890.p01	CDS	COG1405	1275327	1276229	-	[K] Transcription initiation factor TFIIIB, Brf1 subunit/Transcription
638
	PFDSM3638_06895.p01	CDS	COG1369	1276377	1276739	+	[J] RNase P/RNase MRP subunit POP5
	PFDSM3638_06900.p01	CDS	COG1537	1276745	1277815	+	[R] Predicted RNA-binding proteins
	PFDSM3638_06905.p01	CDS	COG0018	1277826	1279715	+	[J] Arginyl-tRNA synthetase
639
	PFDSM3638_06910.p01	CDS	COG1860	1279720	1280154	-	[S] Uncharacterized protein conserved in archaea
	PFDSM3638_06915.p01	CDS	COG0371	1280168	1281208	-	[C] Glycerol dehydrogenase and related enzymes
	PFDSM3638_06920.r01	tRNA	NA	1281255	1281364	-	NA
640
	PFDSM3638_06925.p01	CDS	COG1082	1281448	1282251	+	[G] Sugar phosphate isomerases/epimerases
	PFDSM3638_06930.p01	CDS	ROG8489	1282257	1282631	+	NA
	PFDSM3638_06935.p01	CDS	COG1573	1282632	1283222	+	[L] Uracil-DNA glycosylase
	PFDSM3638_06940.p01	CDS	COG1709	1283267	1283986	+	[K] Predicted transcriptional regulator
641
	PFDSM3638_06945.p01	CDS	COG1701	1283983	1284768	-	[S] Uncharacterized protein conserved in archaea
	PFDSM3638_06950.p01	CDS	COG1765	1284829	1285260	-	[O] Predicted redox protein, regulator of disulfide
642
	PFDSM3638_06955.p01	CDS	COG1533	1285330	1286166	+	[L] DNA repair photolyase
643
	PFDSM3638_06960.p01	CDS	NA	1286152	1286985	-	NA
644
	PFDSM3638_06965.p01	CDS	NA	1287070	1287507	-	NA
	PFDSM3638_06970.p01	CDS	COG1293	1287507	1289456	-	[K] Predicted RNA-binding protein homologous to eukaryotic
645
	PFDSM3638_06975.p01	CDS	COG1543	1289640	1291538	+	[S] Uncharacterized conserved protein
646
	PFDSM3638_06980.p01	CDS	COG0111	1291521	1292441	-	[HE] Phosphoglycerate dehydrogenase and related dehydrogenases
	PFDSM3638_06985.p01	CDS	COG1392	1292447	1293085	-	[P] Phosphate transport regulator (distant homolog of
	PFDSM3638_06990.p01	CDS	COG1893	1293063	1293989	-	[H] Ketopantoate reductase
647
	PFDSM3638_06995.p01	CDS	COG1180	1294053	1295099	+	[O] Pyruvate-formate lyase-activating enzyme
	PFDSM3638_07000.p01	CDS	ROG5375	1295101	1295904	+	NA
[truncated: 991 more rows]
